# Supplementary material for: Shotgun metagenomic analysis of microbial communities from the Loxahatchee nature preserve in the Florida Everglades
Source: Environ Microbiome. 2020 Jan 21;15:2. doi: 10.1186/s40793-019-0352-4 (PMC8067648; doi:10.1186/s40793-019-0352-4)
Supplement: Supplementary file 2 — Additional file 2: Tables S6-S9. Containing biomarker gene counts, taxonomic data for methanogens, sulfate reducers, and nitrogen fixers. [file 40793_2019_352_MOESM2_ESM.xlsx]

## Sheet: S6- Biomarker counts
Function ID	Name	3300032893 Lox_Sample_1.1	3300032829 Lox_Sample_1.3	3300032897 Lox_Sample_1.5	3300032898 Lox_Sample_2.1	3300033134 Lox_Sample_2.2	3300032895 Lox_Sample_2.3	3300032896 Lox_Sample_2.4	3300032955 Lox_Sample_2.5	3300033158 Lox_Sample_3.1	3300032805 Lox_Sample_3.2	3300032783 Lox_Sample_3.3	3300032828 Lox_Sample_3.4	3300032892 Lox_Sample_3.5	3300032782 Lox_Sample_4.1	3300032954 Lox_Sample_4.2	3300033004 Lox_Sample_4.4	3300032770 Lox_Sample_4.5	3300032893 Lox_Sample_1.1	3300032829 Lox_Sample_1.3	3300032897 Lox_Sample_1.5	3300032898 Lox_Sample_2.1	3300033134 Lox_Sample_2.2	3300032895 Lox_Sample_2.3	3300032896 Lox_Sample_2.4	3300032955 Lox_Sample_2.5	3300033158 Lox_Sample_3.1	3300032805 Lox_Sample_3.2	3300032783 Lox_Sample_3.3	3300032828 Lox_Sample_3.4	3300032892 Lox_Sample_3.5	3300032782 Lox_Sample_4.1	3300032954 Lox_Sample_4.2	3300033004 Lox_Sample_4.4	3300032770 Lox_Sample_4.5
KO:K00399	methyl-coenzyme M reductase alpha subunit [EC:2.8.4.1] (mcrA)	56	93	126	0	4	3	0	17	23	26	62	70	48	34	2	69	38	1.40981e-05	2.79931e-05	4.0876e-05	0	1.45873e-06	1.49099e-06	0	6.51629e-06	7.39988e-06	7.14499e-06	1.86958e-05	2.00154e-05	1.29814e-05	1.33983e-05	8.57997e-07	1.81938e-05	9.83765e-06
KO:K00401	methyl-coenzyme M reductase beta subunit [EC:2.8.4.1] (mcrB)	42	81	103	0	6	2	0	6	17	19	34	50	42	34	5	63	28	1.05736e-05	2.43811e-05	3.34145e-05	0	2.1881e-06	9.93996e-07	0	2.29987e-06	5.46948e-06	5.22134e-06	1.02525e-05	1.42967e-05	1.13588e-05	1.33983e-05	2.14499e-06	1.66117e-05	7.24879e-06
KO:K00402	methyl-coenzyme M reductase gamma subunit [EC:2.8.4.1] (mcrG)	32	56	85	0	5	0	0	6	15	9	37	36	27	15	3	45	17	8.05607e-06	1.6856e-05	2.75751e-05	0	1.82342e-06	0	0	2.29987e-06	4.82601e-06	2.47327e-06	1.11572e-05	1.02936e-05	7.30206e-06	5.91104e-06	1.287e-06	1.18655e-05	4.40105e-06
KO:K02586	nitrogenase molybdenum-iron protein alpha chain [EC:1.18.6.1] (nifD)	235	220	298	41	63	35	13	69	79	154	136	154	111	106	39	109	131	5.91617e-05	6.62201e-05	9.66749e-05	1.67895e-05	2.29751e-05	1.73949e-05	5.81661e-06	2.64485e-05	2.5417e-05	4.23204e-05	4.10101e-05	4.40338e-05	3.00196e-05	4.17713e-05	1.67309e-05	2.8741e-05	3.3914e-05
KO:K02587	nitrogenase molybdenum-cofactor synthesis protein NifE (nifE)	212	236	317	22	45	18	10	75	124	151	169	188	144	126	39	152	136	5.33714e-05	7.10362e-05	0.000102839	9.00902e-06	1.64108e-05	8.94596e-06	4.47432e-06	2.87483e-05	3.9895e-05	4.14959e-05	5.09611e-05	5.37556e-05	3.89443e-05	4.96527e-05	1.67309e-05	4.00791e-05	3.52084e-05
KO:K02588	nitrogenase iron protein NifH [EC:1.18.6.1] (nifH)	205	226	317	22	39	18	8	61	74	122	130	158	134	116	36	155	144	5.16092e-05	6.80261e-05	0.000102839	9.00902e-06	1.42227e-05	8.94596e-06	3.57946e-06	2.3382e-05	2.38083e-05	3.35265e-05	3.92008e-05	4.51776e-05	3.62398e-05	4.5712e-05	1.54439e-05	4.08702e-05	3.72795e-05
KO:K02591	nitrogenase molybdenum-iron protein beta chain [EC:1.18.6.1] (nifK)	227	175	250	38	59	16	11	62	85	151	111	168	118	115	41	99	104	5.71477e-05	5.26751e-05	8.11031e-05	1.5561e-05	2.15163e-05	7.95197e-06	4.92175e-06	2.37653e-05	2.73474e-05	4.14959e-05	3.34715e-05	4.80369e-05	3.19127e-05	4.53179e-05	1.75889e-05	2.61042e-05	2.69241e-05
KO:K11180	sulfite reductase alpha subunit [EC:1.8.99.3 1.8.99.5] (dsrA)	195	239	241	16	24	19	9	29	105	124	128	78	196	90	63	176	171	4.90917e-05	7.19392e-05	7.81834e-05	6.55202e-06	8.7524e-06	9.44296e-06	4.02689e-06	1.1116e-05	3.37821e-05	3.40761e-05	3.85978e-05	2.23028e-05	5.30075e-05	3.54662e-05	2.70269e-05	4.64074e-05	4.42694e-05
KO:K11181	sulfite reductase beta subunit [EC:1.8.99.3 1.8.99.5] (dsrB)	188	229	227	28	26	24	8	31	109	133	127	81	179	87	52	171	155	4.73294e-05	6.89291e-05	7.36416e-05	1.1466e-05	9.48177e-06	1.19279e-05	3.57946e-06	1.18826e-05	3.5069e-05	3.65494e-05	3.82962e-05	2.31606e-05	4.84099e-05	3.4284e-05	2.23079e-05	4.5089e-05	4.01272e-05

## Sheet: S7- Methanogens
Scaffold ID	Genome ID	Genome	Gene Count	Sequence Length (bp)	GC Content	Read Depth	Lineage Domain	Lineage Phylum	Lineage Class	Lineage Order	Lineage Family	Lineage Genus	Lineage Species	Lineage Percentage	Ecosystem	Ecosystem Category	Ecosystem Type	Ecosystem Subtype	Specific Ecosystem
3300032829 assembled Ga0335070_10000005	3300032829	Soil microbial communities from Loxahatchee National Wildlife Refuge, Florida, United States - Lox_Sample_1.3 (*) (MER-FS) (assembled)	475	458173	0.55	28	Archaea	Euryarchaeota	Methanomicrobia	Methanomicrobiales	Methanoregulaceae	Methanoregula	Methanoregula boonei	0.77	Environmental	Terrestrial	Soil	Wetlands
3300032893 assembled Ga0335069_10000150	3300032893	Soil microbial communities from Loxahatchee National Wildlife Refuge, Florida, United States - Lox_Sample_1.1 (*) (MER-FS) (assembled)	148	118093	0.57	69	Archaea	Euryarchaeota	Methanomicrobia	Methanomicrobiales	Methanoregulaceae	Methanoregula	Methanoregula boonei	0.84	Environmental	Terrestrial	Soil	Wetlands
3300032897 assembled Ga0335071_10000424	3300032897	Soil microbial communities from Loxahatchee National Wildlife Refuge, Florida, United States - Lox_Sample_1.5 (*) (MER-FS) (assembled)	60	47613	0.57	17	Archaea	Euryarchaeota	Methanomicrobia	Methanocellales	Methanocellaceae	Methanocella	Methanocella paludicola	0.87	Environmental	Terrestrial	Soil	Wetlands
3300032829 assembled Ga0335070_10001113	3300032829	Soil microbial communities from Loxahatchee National Wildlife Refuge, Florida, United States - Lox_Sample_1.3 (*) (MER-FS) (assembled)	29	30634	0.52	33	Archaea	Euryarchaeota	Methanomicrobia	Methanomicrobiales	Methanoregulaceae			0.72	Environmental	Terrestrial	Soil	Wetlands
3300032897 assembled Ga0335071_10001222	3300032897	Soil microbial communities from Loxahatchee National Wildlife Refuge, Florida, United States - Lox_Sample_1.5 (*) (MER-FS) (assembled)	29	27854	0.53	20	Archaea	Euryarchaeota	Methanomicrobia	Methanomicrobiales				0.66	Environmental	Terrestrial	Soil	Wetlands
3300032897 assembled Ga0335071_10001457	3300032897	Soil microbial communities from Loxahatchee National Wildlife Refuge, Florida, United States - Lox_Sample_1.5 (*) (MER-FS) (assembled)	26	25488	0.6	12	Archaea	Euryarchaeota	Thermoplasmata	Methanomassiliicoccales	Methanomassiliicoccaceae	Methanomassiliicoccus	Methanomassiliicoccus luminyensis	0.54	Environmental	Terrestrial	Soil	Wetlands
3300032893 assembled Ga0335069_10003684	3300032893	Soil microbial communities from Loxahatchee National Wildlife Refuge, Florida, United States - Lox_Sample_1.1 (*) (MER-FS) (assembled)	24	23025	0.54	12	Archaea	Euryarchaeota	Methanomicrobia	Methanomicrobiales	Methanoregulaceae	Methanoregula	Methanoregula formicica	0.67	Environmental	Terrestrial	Soil	Wetlands
3300032897 assembled Ga0335071_10002792	3300032897	Soil microbial communities from Loxahatchee National Wildlife Refuge, Florida, United States - Lox_Sample_1.5 (*) (MER-FS) (assembled)	20	18566	0.63	25	Archaea	Euryarchaeota	Methanomicrobia	Methanomicrobiales				0.6	Environmental	Terrestrial	Soil	Wetlands
3300032805 assembled Ga0335078_10006529	3300032805	Soil microbial communities from Loxahatchee National Wildlife Refuge, Florida, United States - Lox_Sample_3.2 (*) (MER-FS) (assembled)	18	17257	0.53	9	Archaea	Euryarchaeota						0.67	Environmental	Terrestrial	Soil	Wetlands
3300032828 assembled Ga0335080_10005562	3300032828	Soil microbial communities from Loxahatchee National Wildlife Refuge, Florida, United States - Lox_Sample_3.4 (*) (MER-FS) (assembled)	19	12974	0.54	15	Archaea	Euryarchaeota	Methanomicrobia	Methanomicrobiales	Methanoregulaceae	Methanoregula	Methanoregula formicica	0.58	Environmental	Terrestrial	Soil	Wetlands
3300032805 assembled Ga0335078_10017258	3300032805	Soil microbial communities from Loxahatchee National Wildlife Refuge, Florida, United States - Lox_Sample_3.2 (*) (MER-FS) (assembled)	12	10718	0.52	13	Archaea	Euryarchaeota	Methanomicrobia	Methanomicrobiales	Methanoregulaceae			0.67	Environmental	Terrestrial	Soil	Wetlands
3300032897 assembled Ga0335071_10009688	3300032897	Soil microbial communities from Loxahatchee National Wildlife Refuge, Florida, United States - Lox_Sample_1.5 (*) (MER-FS) (assembled)	13	9860	0.58	18	Archaea	Euryarchaeota	Methanomicrobia	Methanomicrobiales	Methanoregulaceae	Methanoregula		0.69	Environmental	Terrestrial	Soil	Wetlands
3300032892 assembled Ga0335081_10037331	3300032892	Soil microbial communities from Loxahatchee National Wildlife Refuge, Florida, United States - Lox_Sample_3.5 (*) (MER-FS) (assembled)	6	7744	0.56	16	Archaea	Euryarchaeota	Methanomicrobia	Methanosarcinales	Methanosaetaceae	Methanothrix	Methanothrix soehngenii	1	Environmental	Terrestrial	Soil	Wetlands
3300032783 assembled Ga0335079_10022811	3300032783	Soil microbial communities from Loxahatchee National Wildlife Refuge, Florida, United States - Lox_Sample_3.3 (*) (MER-FS) (assembled)	8	7165	0.62	15	Archaea	Euryarchaeota	Methanomicrobia	Methanomicrobiales	Methanomicrobiaceae			0.38	Environmental	Terrestrial	Soil	Wetlands
3300032897 assembled Ga0335071_10022073	3300032897	Soil microbial communities from Loxahatchee National Wildlife Refuge, Florida, United States - Lox_Sample_1.5 (*) (MER-FS) (assembled)	7	6381	0.54	33	Archaea	Euryarchaeota	Methanomicrobia	Methanomicrobiales	Methanoregulaceae	Methanoregula	Methanoregula formicica	0.71	Environmental	Terrestrial	Soil	Wetlands
3300032897 assembled Ga0335071_10038179	3300032897	Soil microbial communities from Loxahatchee National Wildlife Refuge, Florida, United States - Lox_Sample_1.5 (*) (MER-FS) (assembled)	5	4756	0.57	12	Archaea	Euryarchaeota	Methanomicrobia	Methanomicrobiales	Methanoregulaceae	Methanoregula	Methanoregula boonei	0.6	Environmental	Terrestrial	Soil	Wetlands
3300032897 assembled Ga0335071_10048426	3300032897	Soil microbial communities from Loxahatchee National Wildlife Refuge, Florida, United States - Lox_Sample_1.5 (*) (MER-FS) (assembled)	6	4197	0.53	10	Archaea	Euryarchaeota	Methanomicrobia	Methanomicrobiales	Methanoregulaceae	Methanoregula	Methanoregula boonei	0.67	Environmental	Terrestrial	Soil	Wetlands
3300032829 assembled Ga0335070_10059165	3300032829	Soil microbial communities from Loxahatchee National Wildlife Refuge, Florida, United States - Lox_Sample_1.3 (*) (MER-FS) (assembled)	6	4173	0.55	20	Archaea	Euryarchaeota	Methanomicrobia	Methanocellales	Methanocellaceae	Methanocella	Methanocella paludicola	0.83	Environmental	Terrestrial	Soil	Wetlands
3300032770 assembled Ga0335085_10090020	3300032770	Soil microbial communities from Loxahatchee National Wildlife Refuge, Florida, United States - Lox_Sample_4.5 (*) (MER-FS) (assembled)	4	4001	0.59	8	Archaea	Euryarchaeota	Methanomicrobia	Methanomicrobiales	Methanoregulaceae	Methanoregula	Methanoregula formicica	1	Environmental	Terrestrial	Soil	Wetlands
3300032829 assembled Ga0335070_10074073	3300032829	Soil microbial communities from Loxahatchee National Wildlife Refuge, Florida, United States - Lox_Sample_1.3 (*) (MER-FS) (assembled)	4	3646	0.62	109	Archaea	Euryarchaeota	Methanomicrobia	Methanomicrobiales	Methanoregulaceae			0.75	Environmental	Terrestrial	Soil	Wetlands
3300032897 assembled Ga0335071_10064948	3300032897	Soil microbial communities from Loxahatchee National Wildlife Refuge, Florida, United States - Lox_Sample_1.5 (*) (MER-FS) (assembled)	3	3588	0.5	6	Archaea	Euryarchaeota						1	Environmental	Terrestrial	Soil	Wetlands
3300032829 assembled Ga0335070_10077527	3300032829	Soil microbial communities from Loxahatchee National Wildlife Refuge, Florida, United States - Lox_Sample_1.3 (*) (MER-FS) (assembled)	9	3548	0.54	7									Environmental	Terrestrial	Soil	Wetlands
3300032829 assembled Ga0335070_10082868	3300032829	Soil microbial communities from Loxahatchee National Wildlife Refuge, Florida, United States - Lox_Sample_1.3 (*) (MER-FS) (assembled)	3	3406	0.58	12	Archaea	Euryarchaeota	Methanomicrobia	Methanomicrobiales	Methanoregulaceae	Methanoregula	Methanoregula boonei	0.67	Environmental	Terrestrial	Soil	Wetlands
3300032783 assembled Ga0335079_10098374	3300032783	Soil microbial communities from Loxahatchee National Wildlife Refuge, Florida, United States - Lox_Sample_3.3 (*) (MER-FS) (assembled)	4	3318	0.57	12	Archaea	Euryarchaeota	Methanomicrobia	Methanomicrobiales	Methanoregulaceae	Methanoregula	Methanoregula formicica	0.75	Environmental	Terrestrial	Soil	Wetlands
3300032770 assembled Ga0335085_10125831	3300032770	Soil microbial communities from Loxahatchee National Wildlife Refuge, Florida, United States - Lox_Sample_4.5 (*) (MER-FS) (assembled)	5	3261	0.58	13	Archaea	Euryarchaeota	Methanomicrobia	Methanomicrobiales	Methanoregulaceae	Methanoregula	Methanoregula boonei	0.8	Environmental	Terrestrial	Soil	Wetlands
3300032829 assembled Ga0335070_10090752	3300032829	Soil microbial communities from Loxahatchee National Wildlife Refuge, Florida, United States - Lox_Sample_1.3 (*) (MER-FS) (assembled)	4	3224	0.62	12	Archaea	Euryarchaeota	Thermoplasmata	Methanomassiliicoccales	Methanomassiliicoccaceae	Methanomassiliicoccus	Methanomassiliicoccus luminyensis	1	Environmental	Terrestrial	Soil	Wetlands
3300032783 assembled Ga0335079_10105711	3300032783	Soil microbial communities from Loxahatchee National Wildlife Refuge, Florida, United States - Lox_Sample_3.3 (*) (MER-FS) (assembled)	5	3186	0.57	10	Archaea	Euryarchaeota	Methanomicrobia	Methanomicrobiales	Methanoregulaceae	Methanoregula	Methanoregula boonei	1	Environmental	Terrestrial	Soil	Wetlands
3300032897 assembled Ga0335071_10082081	3300032897	Soil microbial communities from Loxahatchee National Wildlife Refuge, Florida, United States - Lox_Sample_1.5 (*) (MER-FS) (assembled)	5	3160	0.58	8	Archaea	Euryarchaeota	Methanomicrobia	Methanomicrobiales	Methanoregulaceae	Methanoregula	Methanoregula formicica	0.6	Environmental	Terrestrial	Soil	Wetlands
3300032893 assembled Ga0335069_10132108	3300032893	Soil microbial communities from Loxahatchee National Wildlife Refuge, Florida, United States - Lox_Sample_1.1 (*) (MER-FS) (assembled)	5	3114	0.63	11	Archaea	Euryarchaeota	Methanomicrobia	Methanomicrobiales				0.8	Environmental	Terrestrial	Soil	Wetlands
3300032783 assembled Ga0335079_10113425	3300032783	Soil microbial communities from Loxahatchee National Wildlife Refuge, Florida, United States - Lox_Sample_3.3 (*) (MER-FS) (assembled)	4	3064	0.58	11	Archaea	Euryarchaeota	Methanomicrobia	Methanomicrobiales	Methanoregulaceae	Methanoregula	Methanoregula boonei	0.75	Environmental	Terrestrial	Soil	Wetlands
3300032829 assembled Ga0335070_10102312	3300032829	Soil microbial communities from Loxahatchee National Wildlife Refuge, Florida, United States - Lox_Sample_1.3 (*) (MER-FS) (assembled)	5	2995	0.59	16	Archaea	Euryarchaeota	Methanomicrobia	Methanomicrobiales	Methanoregulaceae	Methanoregula	Methanoregula formicica	0.8	Environmental	Terrestrial	Soil	Wetlands
3300032828 assembled Ga0335080_10118398	3300032828	Soil microbial communities from Loxahatchee National Wildlife Refuge, Florida, United States - Lox_Sample_3.4 (*) (MER-FS) (assembled)	4	2939	0.58	22	Archaea	Euryarchaeota	Methanomicrobia	Methanomicrobiales	Methanoregulaceae	Methanoregula	Methanoregula boonei	0.75	Environmental	Terrestrial	Soil	Wetlands
3300032897 assembled Ga0335071_10096932	3300032897	Soil microbial communities from Loxahatchee National Wildlife Refuge, Florida, United States - Lox_Sample_1.5 (*) (MER-FS) (assembled)	4	2892	0.55	10	Archaea	Euryarchaeota	Methanomicrobia	Methanomicrobiales	Methanoregulaceae	Methanoregula	Methanoregula formicica	1	Environmental	Terrestrial	Soil	Wetlands
3300032893 assembled Ga0335069_10165102	3300032893	Soil microbial communities from Loxahatchee National Wildlife Refuge, Florida, United States - Lox_Sample_1.1 (*) (MER-FS) (assembled)	5	2730	0.56	16	Archaea	Euryarchaeota	Methanomicrobia	Methanocellales	Methanocellaceae	Methanocella	Methanocella paludicola	1	Environmental	Terrestrial	Soil	Wetlands
3300032897 assembled Ga0335071_10109474	3300032897	Soil microbial communities from Loxahatchee National Wildlife Refuge, Florida, United States - Lox_Sample_1.5 (*) (MER-FS) (assembled)	3	2708	0.6	15	Archaea	Euryarchaeota	Methanomicrobia	Methanomicrobiales	Methanoregulaceae	Methanoregula	Methanoregula formicica	0.67	Environmental	Terrestrial	Soil	Wetlands
3300032829 assembled Ga0335070_10126408	3300032829	Soil microbial communities from Loxahatchee National Wildlife Refuge, Florida, United States - Lox_Sample_1.3 (*) (MER-FS) (assembled)	5	2635	0.62	25	Archaea	Euryarchaeota	Methanomicrobia	Methanomicrobiales	Methanoregulaceae			0.6	Environmental	Terrestrial	Soil	Wetlands
3300032893 assembled Ga0335069_10180977	3300032893	Soil microbial communities from Loxahatchee National Wildlife Refuge, Florida, United States - Lox_Sample_1.1 (*) (MER-FS) (assembled)	4	2585	0.58	13	Archaea	Euryarchaeota	Methanomicrobia	Methanomicrobiales	Methanoregulaceae	Methanoregula		0.75	Environmental	Terrestrial	Soil	Wetlands
3300032897 assembled Ga0335071_10120706	3300032897	Soil microbial communities from Loxahatchee National Wildlife Refuge, Florida, United States - Lox_Sample_1.5 (*) (MER-FS) (assembled)	3	2569	0.42	12	Archaea	Euryarchaeota	Methanobacteria	Methanobacteriales	Methanobacteriaceae	Methanobacterium		1	Environmental	Terrestrial	Soil	Wetlands
3300032829 assembled Ga0335070_10133958	3300032829	Soil microbial communities from Loxahatchee National Wildlife Refuge, Florida, United States - Lox_Sample_1.3 (*) (MER-FS) (assembled)	3	2543	0.56	9	Archaea	Euryarchaeota	Methanomicrobia	Methanomicrobiales	Methanoregulaceae	Methanoregula		0.67	Environmental	Terrestrial	Soil	Wetlands
3300033158 assembled Ga0335077_10164519	3300033158	Soil microbial communities from Loxahatchee National Wildlife Refuge, Florida, United States - Lox_Sample_3.1 (*) (MER-FS) (assembled)	4	2531	0.64	10	Archaea	Euryarchaeota	Methanomicrobia	Methanomicrobiales				0.75	Environmental	Terrestrial	Soil	Wetlands
3300032829 assembled Ga0335070_10139269	3300032829	Soil microbial communities from Loxahatchee National Wildlife Refuge, Florida, United States - Lox_Sample_1.3 (*) (MER-FS) (assembled)	3	2483	0.58	12	Archaea	Euryarchaeota	Methanomicrobia	Methanomicrobiales	Methanoregulaceae	Methanoregula	Methanoregula formicica	0.67	Environmental	Terrestrial	Soil	Wetlands
3300032828 assembled Ga0335080_10164226	3300032828	Soil microbial communities from Loxahatchee National Wildlife Refuge, Florida, United States - Lox_Sample_3.4 (*) (MER-FS) (assembled)	3	2455	0.63	14	Archaea	Euryarchaeota	Methanomicrobia	Methanomicrobiales	Methanoregulaceae	Methanosphaerula	Methanosphaerula palustris	0.67	Environmental	Terrestrial	Soil	Wetlands
3300032783 assembled Ga0335079_10175870	3300032783	Soil microbial communities from Loxahatchee National Wildlife Refuge, Florida, United States - Lox_Sample_3.3 (*) (MER-FS) (assembled)	4	2389	0.54	11	Archaea	Euryarchaeota	Methanomicrobia	Methanosarcinales	Methanosaetaceae	Methanothrix	Methanothrix soehngenii	0.75	Environmental	Terrestrial	Soil	Wetlands
3300032897 assembled Ga0335071_10139576	3300032897	Soil microbial communities from Loxahatchee National Wildlife Refuge, Florida, United States - Lox_Sample_1.5 (*) (MER-FS) (assembled)	3	2375	0.6	10	Archaea	Euryarchaeota	Methanomicrobia	Methanomicrobiales	Methanoregulaceae	Methanoregula	Methanoregula formicica	0.67	Environmental	Terrestrial	Soil	Wetlands
3300033134 assembled Ga0335073_10217698	3300033134	Soil microbial communities from Loxahatchee National Wildlife Refuge, Florida, United States - Lox_Sample_2.2 (*) (MER-FS) (assembled)	3	2356	0.56	11	Archaea	Euryarchaeota	Methanomicrobia	Methanocellales	Methanocellaceae	Methanocella	Methanocella paludicola	0.67	Environmental	Terrestrial	Soil	Wetlands
3300032897 assembled Ga0335071_10143819	3300032897	Soil microbial communities from Loxahatchee National Wildlife Refuge, Florida, United States - Lox_Sample_1.5 (*) (MER-FS) (assembled)	3	2337	0.61	10	Archaea	Euryarchaeota	Thermoplasmata	Methanomassiliicoccales	Methanomassiliicoccaceae	Methanomassiliicoccus		0.67	Environmental	Terrestrial	Soil	Wetlands
3300032829 assembled Ga0335070_10174083	3300032829	Soil microbial communities from Loxahatchee National Wildlife Refuge, Florida, United States - Lox_Sample_1.3 (*) (MER-FS) (assembled)	3	2166	0.59	9	Archaea	Euryarchaeota	Methanomicrobia	Methanomicrobiales	Methanoregulaceae	Methanolinea	Methanolinea tarda	0.67	Environmental	Terrestrial	Soil	Wetlands
3300032770 assembled Ga0335085_10252989	3300032770	Soil microbial communities from Loxahatchee National Wildlife Refuge, Florida, United States - Lox_Sample_4.5 (*) (MER-FS) (assembled)	2	2116	0.58	7									Environmental	Terrestrial	Soil	Wetlands
3300033004 assembled Ga0335084_10195827	3300033004	Soil microbial communities from Loxahatchee National Wildlife Refuge, Florida, United States - Lox_Sample_4.4 (*) (MER-FS) (assembled)	3	2099	0.61	7									Environmental	Terrestrial	Soil	Wetlands
3300032897 assembled Ga0335071_10175073	3300032897	Soil microbial communities from Loxahatchee National Wildlife Refuge, Florida, United States - Lox_Sample_1.5 (*) (MER-FS) (assembled)	4	2098	0.58	11	Archaea	Euryarchaeota	Methanomicrobia	Methanocellales	Methanocellaceae	Methanocella	Methanocella paludicola	0.75	Environmental	Terrestrial	Soil	Wetlands
3300032770 assembled Ga0335085_10292780	3300032770	Soil microbial communities from Loxahatchee National Wildlife Refuge, Florida, United States - Lox_Sample_4.5 (*) (MER-FS) (assembled)	2	1934	0.58	12									Environmental	Terrestrial	Soil	Wetlands
3300032828 assembled Ga0335080_10258898	3300032828	Soil microbial communities from Loxahatchee National Wildlife Refuge, Florida, United States - Lox_Sample_3.4 (*) (MER-FS) (assembled)	3	1899	0.63	9	Archaea	Euryarchaeota	Methanomicrobia	Methanomicrobiales	Methanoregulaceae	Methanolinea	Methanolinea tarda	1	Environmental	Terrestrial	Soil	Wetlands
3300032897 assembled Ga0335071_10227227	3300032897	Soil microbial communities from Loxahatchee National Wildlife Refuge, Florida, United States - Lox_Sample_1.5 (*) (MER-FS) (assembled)	2	1820	0.59	10	Archaea	Euryarchaeota	Thermoplasmata	Methanomassiliicoccales	Methanomassiliicoccaceae			1	Environmental	Terrestrial	Soil	Wetlands
3300032829 assembled Ga0335070_10235608	3300032829	Soil microbial communities from Loxahatchee National Wildlife Refuge, Florida, United States - Lox_Sample_1.3 (*) (MER-FS) (assembled)	3	1802	0.61	26	Archaea	Euryarchaeota	Methanomicrobia	Methanomicrobiales				0.67	Environmental	Terrestrial	Soil	Wetlands
3300032893 assembled Ga0335069_10335660	3300032893	Soil microbial communities from Loxahatchee National Wildlife Refuge, Florida, United States - Lox_Sample_1.1 (*) (MER-FS) (assembled)	2	1789	0.59	17	Archaea	Euryarchaeota	Methanomicrobia	Methanomicrobiales	Methanoregulaceae	Methanoregula	Methanoregula boonei	1	Environmental	Terrestrial	Soil	Wetlands
3300032782 assembled Ga0335082_10222085	3300032782	Soil microbial communities from Loxahatchee National Wildlife Refuge, Florida, United States - Lox_Sample_4.1 (*) (MER-FS) (assembled)	3	1781	0.59	15	Archaea	Euryarchaeota	Methanomicrobia	Methanomicrobiales	Methanoregulaceae	Methanoregula	Methanoregula boonei	0.67	Environmental	Terrestrial	Soil	Wetlands
3300033004 assembled Ga0335084_10269875	3300033004	Soil microbial communities from Loxahatchee National Wildlife Refuge, Florida, United States - Lox_Sample_4.4 (*) (MER-FS) (assembled)	2	1761	0.58	10	Archaea	Euryarchaeota	Methanomicrobia	Methanomicrobiales	Methanoregulaceae	Methanoregula	Methanoregula boonei	1	Environmental	Terrestrial	Soil	Wetlands
3300033004 assembled Ga0335084_10273248	3300033004	Soil microbial communities from Loxahatchee National Wildlife Refuge, Florida, United States - Lox_Sample_4.4 (*) (MER-FS) (assembled)	2	1748	0.63	19									Environmental	Terrestrial	Soil	Wetlands
3300033004 assembled Ga0335084_10285812	3300033004	Soil microbial communities from Loxahatchee National Wildlife Refuge, Florida, United States - Lox_Sample_4.4 (*) (MER-FS) (assembled)	2	1706	0.47	16	Archaea	Euryarchaeota	Methanobacteria	Methanobacteriales	Methanobacteriaceae	Methanobacterium		1	Environmental	Terrestrial	Soil	Wetlands
3300032897 assembled Ga0335071_10257060	3300032897	Soil microbial communities from Loxahatchee National Wildlife Refuge, Florida, United States - Lox_Sample_1.5 (*) (MER-FS) (assembled)	2	1700	0.62	10	Archaea	Euryarchaeota	Methanomicrobia	Methanomicrobiales	Methanoregulaceae	Methanoregula		1	Environmental	Terrestrial	Soil	Wetlands
3300032770 assembled Ga0335085_10365146	3300032770	Soil microbial communities from Loxahatchee National Wildlife Refuge, Florida, United States - Lox_Sample_4.5 (*) (MER-FS) (assembled)	1	1687	0.59	10	Archaea	Euryarchaeota	Methanomicrobia	Methanomicrobiales	Methanoregulaceae	Methanoregula	Methanoregula formicica	1	Environmental	Terrestrial	Soil	Wetlands
3300032897 assembled Ga0335071_10275431	3300032897	Soil microbial communities from Loxahatchee National Wildlife Refuge, Florida, United States - Lox_Sample_1.5 (*) (MER-FS) (assembled)	2	1636	0.6	8	Archaea	Euryarchaeota	Methanomicrobia	Methanomicrobiales				1	Environmental	Terrestrial	Soil	Wetlands
3300032897 assembled Ga0335071_10285976	3300032897	Soil microbial communities from Loxahatchee National Wildlife Refuge, Florida, United States - Lox_Sample_1.5 (*) (MER-FS) (assembled)	2	1602	0.59	12	Archaea	Euryarchaeota	Methanomicrobia	Methanomicrobiales	Methanoregulaceae	Methanoregula	Methanoregula formicica	1	Environmental	Terrestrial	Soil	Wetlands
3300032828 assembled Ga0335080_10360483	3300032828	Soil microbial communities from Loxahatchee National Wildlife Refuge, Florida, United States - Lox_Sample_3.4 (*) (MER-FS) (assembled)	2	1567	0.41	13	Archaea	Euryarchaeota	Methanobacteria	Methanobacteriales	Methanobacteriaceae	Methanobacterium		1	Environmental	Terrestrial	Soil	Wetlands
3300032782 assembled Ga0335082_10276809	3300032782	Soil microbial communities from Loxahatchee National Wildlife Refuge, Florida, United States - Lox_Sample_4.1 (*) (MER-FS) (assembled)	2	1556	0.6	16	Archaea	Euryarchaeota	Methanomicrobia	Methanocellales	Methanocellaceae	Methanocella	Methanocella paludicola	1	Environmental	Terrestrial	Soil	Wetlands
3300032783 assembled Ga0335079_10390312	3300032783	Soil microbial communities from Loxahatchee National Wildlife Refuge, Florida, United States - Lox_Sample_3.3 (*) (MER-FS) (assembled)	1	1503	0.57	6	Archaea	Euryarchaeota	Methanomicrobia	Methanomicrobiales	Methanoregulaceae	Methanoregula	Methanoregula formicica	1	Environmental	Terrestrial	Soil	Wetlands
3300032892 assembled Ga0335081_10519886	3300032892	Soil microbial communities from Loxahatchee National Wildlife Refuge, Florida, United States - Lox_Sample_3.5 (*) (MER-FS) (assembled)	1	1491	0.6	22	Archaea	Euryarchaeota	Methanomicrobia	Methanomicrobiales	Methanoregulaceae	Methanoregula	Methanoregula formicica	1	Environmental	Terrestrial	Soil	Wetlands
3300032783 assembled Ga0335079_10411944	3300032783	Soil microbial communities from Loxahatchee National Wildlife Refuge, Florida, United States - Lox_Sample_3.3 (*) (MER-FS) (assembled)	2	1455	0.47	11									Environmental	Terrestrial	Soil	Wetlands
3300032829 assembled Ga0335070_10341515	3300032829	Soil microbial communities from Loxahatchee National Wildlife Refuge, Florida, United States - Lox_Sample_1.3 (*) (MER-FS) (assembled)	3	1443	0.61	14	Archaea	Euryarchaeota	Methanomicrobia	Methanomicrobiales	Methanoregulaceae	Methanoregula	Methanoregula formicica	1	Environmental	Terrestrial	Soil	Wetlands
3300032770 assembled Ga0335085_10486974	3300032770	Soil microbial communities from Loxahatchee National Wildlife Refuge, Florida, United States - Lox_Sample_4.5 (*) (MER-FS) (assembled)	1	1411	0.65	13									Environmental	Terrestrial	Soil	Wetlands
3300032783 assembled Ga0335079_10438732	3300032783	Soil microbial communities from Loxahatchee National Wildlife Refuge, Florida, United States - Lox_Sample_3.3 (*) (MER-FS) (assembled)	3	1402	0.55	11	Archaea	Euryarchaeota	Methanomicrobia	Methanosarcinales	Methanosaetaceae	Methanothrix	Methanothrix soehngenii	0.67	Environmental	Terrestrial	Soil	Wetlands
3300032805 assembled Ga0335078_10607454	3300032805	Soil microbial communities from Loxahatchee National Wildlife Refuge, Florida, United States - Lox_Sample_3.2 (*) (MER-FS) (assembled)	1	1378	0.55	10	Archaea	Euryarchaeota	Methanomicrobia	Methanomicrobiales	Methanoregulaceae	Methanoregula	Methanoregula boonei	1	Environmental	Terrestrial	Soil	Wetlands
3300033004 assembled Ga0335084_10421300	3300033004	Soil microbial communities from Loxahatchee National Wildlife Refuge, Florida, United States - Lox_Sample_4.4 (*) (MER-FS) (assembled)	1	1375	0.6	17	Archaea	Euryarchaeota	Methanomicrobia	Methanosarcinales	Methanosaetaceae	Methanothrix	Methanothrix soehngenii	1	Environmental	Terrestrial	Soil	Wetlands
3300033004 assembled Ga0335084_10455845	3300033004	Soil microbial communities from Loxahatchee National Wildlife Refuge, Florida, United States - Lox_Sample_4.4 (*) (MER-FS) (assembled)	1	1315	0.66	20	Archaea	Euryarchaeota	Methanomicrobia	Methanocellales	Methanocellaceae	Methanocella	Methanocella arvoryzae	1	Environmental	Terrestrial	Soil	Wetlands
3300032829 assembled Ga0335070_10401013	3300032829	Soil microbial communities from Loxahatchee National Wildlife Refuge, Florida, United States - Lox_Sample_1.3 (*) (MER-FS) (assembled)	1	1312	0.59	9	Archaea	Euryarchaeota	Methanomicrobia	Methanomicrobiales	Methanoregulaceae	Methanoregula	Methanoregula formicica	1	Environmental	Terrestrial	Soil	Wetlands
3300032897 assembled Ga0335071_10414958	3300032897	Soil microbial communities from Loxahatchee National Wildlife Refuge, Florida, United States - Lox_Sample_1.5 (*) (MER-FS) (assembled)	2	1299	0.58	42	Archaea	Euryarchaeota	Methanomicrobia	Methanomicrobiales	Methanoregulaceae	Methanoregula		1	Environmental	Terrestrial	Soil	Wetlands
3300032829 assembled Ga0335070_10410785	3300032829	Soil microbial communities from Loxahatchee National Wildlife Refuge, Florida, United States - Lox_Sample_1.3 (*) (MER-FS) (assembled)	2	1293	0.57	11	Archaea	Euryarchaeota	Methanomicrobia	Methanomicrobiales	Methanoregulaceae	Methanoregula		1	Environmental	Terrestrial	Soil	Wetlands
3300032783 assembled Ga0335079_10513267	3300032783	Soil microbial communities from Loxahatchee National Wildlife Refuge, Florida, United States - Lox_Sample_3.3 (*) (MER-FS) (assembled)	2	1277	0.42	11									Environmental	Terrestrial	Soil	Wetlands
3300032783 assembled Ga0335079_10528380	3300032783	Soil microbial communities from Loxahatchee National Wildlife Refuge, Florida, United States - Lox_Sample_3.3 (*) (MER-FS) (assembled)	2	1255	0.58	6	Archaea	Euryarchaeota	Methanomicrobia	Methanomicrobiales	Methanoregulaceae			1	Environmental	Terrestrial	Soil	Wetlands
3300033004 assembled Ga0335084_10497805	3300033004	Soil microbial communities from Loxahatchee National Wildlife Refuge, Florida, United States - Lox_Sample_4.4 (*) (MER-FS) (assembled)	2	1252	0.6	8	Archaea	Euryarchaeota	Methanomicrobia	Methanocellales	Methanocellaceae	Methanocella	Methanocella paludicola	1	Environmental	Terrestrial	Soil	Wetlands
3300032893 assembled Ga0335069_10610361	3300032893	Soil microbial communities from Loxahatchee National Wildlife Refuge, Florida, United States - Lox_Sample_1.1 (*) (MER-FS) (assembled)	2	1250	0.6	16	Archaea	Euryarchaeota	Methanomicrobia	Methanomicrobiales	Methanoregulaceae	Methanoregula	Methanoregula boonei	1	Environmental	Terrestrial	Soil	Wetlands
3300032897 assembled Ga0335071_10443962	3300032897	Soil microbial communities from Loxahatchee National Wildlife Refuge, Florida, United States - Lox_Sample_1.5 (*) (MER-FS) (assembled)	1	1250	0.49	8	Archaea	Euryarchaeota	Methanobacteria	Methanobacteriales	Methanobacteriaceae	Methanobacterium	Methanobacterium formicicum	1	Environmental	Terrestrial	Soil	Wetlands
3300032829 assembled Ga0335070_10446388	3300032829	Soil microbial communities from Loxahatchee National Wildlife Refuge, Florida, United States - Lox_Sample_1.3 (*) (MER-FS) (assembled)	2	1231	0.59	9	Archaea	Euryarchaeota	Methanomicrobia	Methanomicrobiales	Methanoregulaceae	Methanoregula		1	Environmental	Terrestrial	Soil	Wetlands
3300033134 assembled Ga0335073_10615505	3300033134	Soil microbial communities from Loxahatchee National Wildlife Refuge, Florida, United States - Lox_Sample_2.2 (*) (MER-FS) (assembled)	2	1209	0.41	8	Archaea	Euryarchaeota	Methanobacteria	Methanobacteriales	Methanobacteriaceae	Methanobacterium		1	Environmental	Terrestrial	Soil	Wetlands
3300032897 assembled Ga0335071_10483182	3300032897	Soil microbial communities from Loxahatchee National Wildlife Refuge, Florida, United States - Lox_Sample_1.5 (*) (MER-FS) (assembled)	1	1191	0.6	13	Archaea	Euryarchaeota	Methanomicrobia	Methanocellales	Methanocellaceae	Methanocella	Methanocella paludicola	1	Environmental	Terrestrial	Soil	Wetlands
3300032782 assembled Ga0335082_10435002	3300032782	Soil microbial communities from Loxahatchee National Wildlife Refuge, Florida, United States - Lox_Sample_4.1 (*) (MER-FS) (assembled)	1	1175	0.58	9	Archaea	Euryarchaeota	Methanomicrobia	Methanomicrobiales	Methanoregulaceae	Methanoregula	Methanoregula formicica	1	Environmental	Terrestrial	Soil	Wetlands
3300032783 assembled Ga0335079_10594152	3300032783	Soil microbial communities from Loxahatchee National Wildlife Refuge, Florida, United States - Lox_Sample_3.3 (*) (MER-FS) (assembled)	1	1168	0.65	14									Environmental	Terrestrial	Soil	Wetlands
3300033004 assembled Ga0335084_10574109	3300033004	Soil microbial communities from Loxahatchee National Wildlife Refuge, Florida, United States - Lox_Sample_4.4 (*) (MER-FS) (assembled)	2	1155	0.61	11	Archaea	Euryarchaeota	Methanomicrobia	Methanomicrobiales	Methanoregulaceae	Methanoregula	Methanoregula formicica	1	Environmental	Terrestrial	Soil	Wetlands
3300033004 assembled Ga0335084_10584644	3300033004	Soil microbial communities from Loxahatchee National Wildlife Refuge, Florida, United States - Lox_Sample_4.4 (*) (MER-FS) (assembled)	1	1143	0.65	10									Environmental	Terrestrial	Soil	Wetlands
3300033134 assembled Ga0335073_10674866	3300033134	Soil microbial communities from Loxahatchee National Wildlife Refuge, Florida, United States - Lox_Sample_2.2 (*) (MER-FS) (assembled)	2	1136	0.42	9	Archaea	Euryarchaeota	Methanobacteria	Methanobacteriales	Methanobacteriaceae			1	Environmental	Terrestrial	Soil	Wetlands
3300033004 assembled Ga0335084_10610102	3300033004	Soil microbial communities from Loxahatchee National Wildlife Refuge, Florida, United States - Lox_Sample_4.4 (*) (MER-FS) (assembled)	1	1116	0.57	7	Archaea	Euryarchaeota	Methanomicrobia	Methanomicrobiales	Methanoregulaceae	Methanoregula	Methanoregula formicica	1	Environmental	Terrestrial	Soil	Wetlands
3300033158 assembled Ga0335077_10637097	3300033158	Soil microbial communities from Loxahatchee National Wildlife Refuge, Florida, United States - Lox_Sample_3.1 (*) (MER-FS) (assembled)	1	1107	0.48	8	Archaea	Euryarchaeota	Methanomicrobia	Methanosarcinales	Methanosarcinaceae	Methanosarcina	Methanosarcina sp. DSM 11855	1	Environmental	Terrestrial	Soil	Wetlands
3300032782 assembled Ga0335082_10493120	3300032782	Soil microbial communities from Loxahatchee National Wildlife Refuge, Florida, United States - Lox_Sample_4.1 (*) (MER-FS) (assembled)	1	1087	0.6	13	Archaea	Euryarchaeota	Methanomicrobia	Methanomicrobiales	Methanoregulaceae	Methanoregula	Methanoregula boonei	1	Environmental	Terrestrial	Soil	Wetlands
3300032892 assembled Ga0335081_10855767	3300032892	Soil microbial communities from Loxahatchee National Wildlife Refuge, Florida, United States - Lox_Sample_3.5 (*) (MER-FS) (assembled)	2	1078	0.4	13	Archaea	Euryarchaeota	Methanobacteria	Methanobacteriales	Methanobacteriaceae	Methanobacterium		1	Environmental	Terrestrial	Soil	Wetlands
3300032897 assembled Ga0335071_10576927	3300032897	Soil microbial communities from Loxahatchee National Wildlife Refuge, Florida, United States - Lox_Sample_1.5 (*) (MER-FS) (assembled)	1	1076	0.61	15	Archaea	Euryarchaeota	Methanomicrobia	Methanomicrobiales	Methanoregulaceae	Methanoregula	Methanoregula formicica	1	Environmental	Terrestrial	Soil	Wetlands
3300032829 assembled Ga0335070_10567922	3300032829	Soil microbial communities from Loxahatchee National Wildlife Refuge, Florida, United States - Lox_Sample_1.3 (*) (MER-FS) (assembled)	2	1070	0.61	7	Archaea	Euryarchaeota	Methanomicrobia	Methanomicrobiales	Methanoregulaceae	Methanoregula	Methanoregula formicica	1	Environmental	Terrestrial	Soil	Wetlands
3300032892 assembled Ga0335081_10869259	3300032892	Soil microbial communities from Loxahatchee National Wildlife Refuge, Florida, United States - Lox_Sample_3.5 (*) (MER-FS) (assembled)	1	1067	0.64	22									Environmental	Terrestrial	Soil	Wetlands
3300032897 assembled Ga0335071_10587567	3300032897	Soil microbial communities from Loxahatchee National Wildlife Refuge, Florida, United States - Lox_Sample_1.5 (*) (MER-FS) (assembled)	2	1065	0.58	7	Archaea	Euryarchaeota	Methanomicrobia	Methanomicrobiales	Methanoregulaceae	Methanoregula		1	Environmental	Terrestrial	Soil	Wetlands
3300032897 assembled Ga0335071_10589847	3300032897	Soil microbial communities from Loxahatchee National Wildlife Refuge, Florida, United States - Lox_Sample_1.5 (*) (MER-FS) (assembled)	2	1063	0.46	12	Archaea	Euryarchaeota	Methanobacteria	Methanobacteriales	Methanobacteriaceae	Methanobacterium		1	Environmental	Terrestrial	Soil	Wetlands
3300033004 assembled Ga0335084_10671282	3300033004	Soil microbial communities from Loxahatchee National Wildlife Refuge, Florida, United States - Lox_Sample_4.4 (*) (MER-FS) (assembled)	1	1057	0.61	16	Archaea	Euryarchaeota	Methanomicrobia	Methanomicrobiales	Methanoregulaceae	Methanoregula	Methanoregula formicica	1	Environmental	Terrestrial	Soil	Wetlands
3300033004 assembled Ga0335084_10682179	3300033004	Soil microbial communities from Loxahatchee National Wildlife Refuge, Florida, United States - Lox_Sample_4.4 (*) (MER-FS) (assembled)	2	1048	0.43	14									Environmental	Terrestrial	Soil	Wetlands
3300032897 assembled Ga0335071_10623875	3300032897	Soil microbial communities from Loxahatchee National Wildlife Refuge, Florida, United States - Lox_Sample_1.5 (*) (MER-FS) (assembled)	1	1029	0.66	24	Archaea	Euryarchaeota	Methanomicrobia	Methanocellales	Methanocellaceae	Methanocella	Methanocella paludicola	1	Environmental	Terrestrial	Soil	Wetlands
3300032782 assembled Ga0335082_10546766	3300032782	Soil microbial communities from Loxahatchee National Wildlife Refuge, Florida, United States - Lox_Sample_4.1 (*) (MER-FS) (assembled)	1	1020	0.63	14	Archaea	Euryarchaeota	Methanomicrobia	Methanocellales	Methanocellaceae	Methanocella	Methanocella arvoryzae	1	Environmental	Terrestrial	Soil	Wetlands

## Sheet: S8- S04 reducers
Scaffold ID	Genome ID	Genome	Gene Count	Sequence Length (bp)	GC Content	Read Depth	Lineage Domain	Lineage Phylum	Lineage Class	Lineage Order	Lineage Family	Lineage Genus	Lineage Species	Lineage Percentage	Ecosystem	Ecosystem Category	Ecosystem Type	Ecosystem Subtype	Specific Ecosystem
3300032770 assembled Ga0335085_10000013	3300032770	Soil microbial communities from Loxahatchee National Wildlife Refuge, Florida, United States - Lox_Sample_4.5 (*) (MER-FS) (assembled)	636	732090	0.62	94	Bacteria							0.72	Environmental	Terrestrial	Soil	Wetlands
3300032805 assembled Ga0335078_10000007	3300032805	Soil microbial communities from Loxahatchee National Wildlife Refuge, Florida, United States - Lox_Sample_3.2 (*) (MER-FS) (assembled)	341	436839	0.61	17	Bacteria	Acidobacteria	Acidobacteriia	Acidobacteriales	Acidobacteriaceae			0.64	Environmental	Terrestrial	Soil	Wetlands
3300032770 assembled Ga0335085_10000155	3300032770	Soil microbial communities from Loxahatchee National Wildlife Refuge, Florida, United States - Lox_Sample_4.5 (*) (MER-FS) (assembled)	216	219548	0.64	29	Bacteria	Proteobacteria	Betaproteobacteria					0.54	Environmental	Terrestrial	Soil	Wetlands
3300032954 assembled Ga0335083_10000076	3300032954	Soil microbial communities from Loxahatchee National Wildlife Refuge, Florida, United States - Lox_Sample_4.2 (*) (MER-FS) (assembled)	155	172042	0.64	16	Bacteria							0.86	Environmental	Terrestrial	Soil	Wetlands
3300032892 assembled Ga0335081_10000110	3300032892	Soil microbial communities from Loxahatchee National Wildlife Refuge, Florida, United States - Lox_Sample_3.5 (*) (MER-FS) (assembled)	152	162738	0.53	20	Bacteria							0.64	Environmental	Terrestrial	Soil	Wetlands
3300032783 assembled Ga0335079_10000052	3300032783	Soil microbial communities from Loxahatchee National Wildlife Refuge, Florida, United States - Lox_Sample_3.3 (*) (MER-FS) (assembled)	142	134154	0.57	18	Bacteria							0.67	Environmental	Terrestrial	Soil	Wetlands
3300032770 assembled Ga0335085_10000614	3300032770	Soil microbial communities from Loxahatchee National Wildlife Refuge, Florida, United States - Lox_Sample_4.5 (*) (MER-FS) (assembled)	83	95577	0.71	21	Bacteria							0.64	Environmental	Terrestrial	Soil	Wetlands
3300032897 assembled Ga0335071_10000146	3300032897	Soil microbial communities from Loxahatchee National Wildlife Refuge, Florida, United States - Lox_Sample_1.5 (*) (MER-FS) (assembled)	86	83806	0.63	17	Bacteria							0.76	Environmental	Terrestrial	Soil	Wetlands
3300032893 assembled Ga0335069_10000316	3300032893	Soil microbial communities from Loxahatchee National Wildlife Refuge, Florida, United States - Lox_Sample_1.1 (*) (MER-FS) (assembled)	85	82975	0.63	19	Bacteria							0.76	Environmental	Terrestrial	Soil	Wetlands
3300032892 assembled Ga0335081_10000598	3300032892	Soil microbial communities from Loxahatchee National Wildlife Refuge, Florida, United States - Lox_Sample_3.5 (*) (MER-FS) (assembled)	59	60185	0.54	27	Bacteria							0.73	Environmental	Terrestrial	Soil	Wetlands
3300032770 assembled Ga0335085_10001328	3300032770	Soil microbial communities from Loxahatchee National Wildlife Refuge, Florida, United States - Lox_Sample_4.5 (*) (MER-FS) (assembled)	39	54071	0.6	28	Bacteria							0.82	Environmental	Terrestrial	Soil	Wetlands
3300032829 assembled Ga0335070_10000353	3300032829	Soil microbial communities from Loxahatchee National Wildlife Refuge, Florida, United States - Lox_Sample_1.3 (*) (MER-FS) (assembled)	57	53307	0.49	13	Bacteria	Nitrospirae						0.53	Environmental	Terrestrial	Soil	Wetlands
3300032893 assembled Ga0335069_10000843	3300032893	Soil microbial communities from Loxahatchee National Wildlife Refuge, Florida, United States - Lox_Sample_1.1 (*) (MER-FS) (assembled)	53	49331	0.67	14	Bacteria	Proteobacteria	Betaproteobacteria					0.6	Environmental	Terrestrial	Soil	Wetlands
3300032829 assembled Ga0335070_10000422	3300032829	Soil microbial communities from Loxahatchee National Wildlife Refuge, Florida, United States - Lox_Sample_1.3 (*) (MER-FS) (assembled)	51	47511	0.53	25	Bacteria							0.86	Environmental	Terrestrial	Soil	Wetlands
3300032892 assembled Ga0335081_10000981	3300032892	Soil microbial communities from Loxahatchee National Wildlife Refuge, Florida, United States - Lox_Sample_3.5 (*) (MER-FS) (assembled)	46	45742	0.53	11	Bacteria							0.63	Environmental	Terrestrial	Soil	Wetlands
3300032898 assembled Ga0335072_10001949	3300032898	Soil microbial communities from Loxahatchee National Wildlife Refuge, Florida, United States - Lox_Sample_2.1 (*) (MER-FS) (assembled)	31	32710	0.6	14	Bacteria							0.84	Environmental	Terrestrial	Soil	Wetlands
3300032897 assembled Ga0335071_10000888	3300032897	Soil microbial communities from Loxahatchee National Wildlife Refuge, Florida, United States - Lox_Sample_1.5 (*) (MER-FS) (assembled)	29	32243	0.59	18	Bacteria	Proteobacteria	Deltaproteobacteria	Syntrophobacterales	Syntrophaceae			0.55	Environmental	Terrestrial	Soil	Wetlands
3300033004 assembled Ga0335084_10000591	3300033004	Soil microbial communities from Loxahatchee National Wildlife Refuge, Florida, United States - Lox_Sample_4.4 (*) (MER-FS) (assembled)	31	31242	0.72	14	Bacteria	Proteobacteria						0.52	Environmental	Terrestrial	Soil	Wetlands
3300032829 assembled Ga0335070_10001102	3300032829	Soil microbial communities from Loxahatchee National Wildlife Refuge, Florida, United States - Lox_Sample_1.3 (*) (MER-FS) (assembled)	31	30803	0.48	21	Bacteria							0.84	Environmental	Terrestrial	Soil	Wetlands
3300032897 assembled Ga0335071_10001003	3300032897	Soil microbial communities from Loxahatchee National Wildlife Refuge, Florida, United States - Lox_Sample_1.5 (*) (MER-FS) (assembled)	31	30492	0.59	11	Bacteria							0.68	Environmental	Terrestrial	Soil	Wetlands
3300032893 assembled Ga0335069_10002632	3300032893	Soil microbial communities from Loxahatchee National Wildlife Refuge, Florida, United States - Lox_Sample_1.1 (*) (MER-FS) (assembled)	29	27504	0.61	10	Bacteria							0.72	Environmental	Terrestrial	Soil	Wetlands
3300032782 assembled Ga0335082_10001220	3300032782	Soil microbial communities from Loxahatchee National Wildlife Refuge, Florida, United States - Lox_Sample_4.1 (*) (MER-FS) (assembled)	35	27415	0.53	20	Bacteria							0.71	Environmental	Terrestrial	Soil	Wetlands
3300032893 assembled Ga0335069_10002710	3300032893	Soil microbial communities from Loxahatchee National Wildlife Refuge, Florida, United States - Lox_Sample_1.1 (*) (MER-FS) (assembled)	26	27042	0.49	9	Bacteria							0.58	Environmental	Terrestrial	Soil	Wetlands
3300032892 assembled Ga0335081_10002974	3300032892	Soil microbial communities from Loxahatchee National Wildlife Refuge, Florida, United States - Lox_Sample_3.5 (*) (MER-FS) (assembled)	21	26616	0.59	14	Bacteria							0.76	Environmental	Terrestrial	Soil	Wetlands
3300032892 assembled Ga0335081_10003132	3300032892	Soil microbial communities from Loxahatchee National Wildlife Refuge, Florida, United States - Lox_Sample_3.5 (*) (MER-FS) (assembled)	28	26006	0.59	15	Bacteria							0.54	Environmental	Terrestrial	Soil	Wetlands
3300032892 assembled Ga0335081_10003331	3300032892	Soil microbial communities from Loxahatchee National Wildlife Refuge, Florida, United States - Lox_Sample_3.5 (*) (MER-FS) (assembled)	26	25261	0.53	9	Bacteria	Proteobacteria	Deltaproteobacteria	Syntrophobacterales	Syntrophaceae			0.54	Environmental	Terrestrial	Soil	Wetlands
3300032805 assembled Ga0335078_10003278	3300032805	Soil microbial communities from Loxahatchee National Wildlife Refuge, Florida, United States - Lox_Sample_3.2 (*) (MER-FS) (assembled)	18	24147	0.64	17	Bacteria							0.83	Environmental	Terrestrial	Soil	Wetlands
3300032892 assembled Ga0335081_10003893	3300032892	Soil microbial communities from Loxahatchee National Wildlife Refuge, Florida, United States - Lox_Sample_3.5 (*) (MER-FS) (assembled)	23	23540	0.52	13	Bacteria							0.83	Environmental	Terrestrial	Soil	Wetlands
3300033134 assembled Ga0335073_10003126	3300033134	Soil microbial communities from Loxahatchee National Wildlife Refuge, Florida, United States - Lox_Sample_2.2 (*) (MER-FS) (assembled)	24	22911	0.6	19	Bacteria							0.96	Environmental	Terrestrial	Soil	Wetlands
3300032829 assembled Ga0335070_10002288	3300032829	Soil microbial communities from Loxahatchee National Wildlife Refuge, Florida, United States - Lox_Sample_1.3 (*) (MER-FS) (assembled)	25	22327	0.5	14	Bacteria							0.96	Environmental	Terrestrial	Soil	Wetlands
3300032892 assembled Ga0335081_10004468	3300032892	Soil microbial communities from Loxahatchee National Wildlife Refuge, Florida, United States - Lox_Sample_3.5 (*) (MER-FS) (assembled)	25	22045	0.61	14	Bacteria							0.64	Environmental	Terrestrial	Soil	Wetlands
3300033158 assembled Ga0335077_10002663	3300033158	Soil microbial communities from Loxahatchee National Wildlife Refuge, Florida, United States - Lox_Sample_3.1 (*) (MER-FS) (assembled)	26	21400	0.54	13	Bacteria							0.54	Environmental	Terrestrial	Soil	Wetlands
3300032897 assembled Ga0335071_10002212	3300032897	Soil microbial communities from Loxahatchee National Wildlife Refuge, Florida, United States - Lox_Sample_1.5 (*) (MER-FS) (assembled)	20	20903	0.64	15	Bacteria	Verrucomicrobia	Verrucomicrobiae	Verrucomicrobiales	Verrucomicrobia subdivision 3	Pedosphaera	Pedosphaera parvula	0.55	Environmental	Terrestrial	Soil	Wetlands
3300032892 assembled Ga0335081_10005828	3300032892	Soil microbial communities from Loxahatchee National Wildlife Refuge, Florida, United States - Lox_Sample_3.5 (*) (MER-FS) (assembled)	23	19520	0.62	16	Bacteria							0.74	Environmental	Terrestrial	Soil	Wetlands
3300032892 assembled Ga0335081_10006056	3300032892	Soil microbial communities from Loxahatchee National Wildlife Refuge, Florida, United States - Lox_Sample_3.5 (*) (MER-FS) (assembled)	21	19196	0.47	11	Bacteria							0.76	Environmental	Terrestrial	Soil	Wetlands
3300032829 assembled Ga0335070_10003770	3300032829	Soil microbial communities from Loxahatchee National Wildlife Refuge, Florida, United States - Lox_Sample_1.3 (*) (MER-FS) (assembled)	20	17712	0.7	13	Bacteria	Proteobacteria	Gammaproteobacteria	Acidiferrobacterales	Acidiferrobacteraceae			0.75	Environmental	Terrestrial	Soil	Wetlands
3300032892 assembled Ga0335081_10007525	3300032892	Soil microbial communities from Loxahatchee National Wildlife Refuge, Florida, United States - Lox_Sample_3.5 (*) (MER-FS) (assembled)	17	17411	0.63	17	Bacteria							0.88	Environmental	Terrestrial	Soil	Wetlands
3300032892 assembled Ga0335081_10007827	3300032892	Soil microbial communities from Loxahatchee National Wildlife Refuge, Florida, United States - Lox_Sample_3.5 (*) (MER-FS) (assembled)	18	17117	0.53	29	Bacteria							0.61	Environmental	Terrestrial	Soil	Wetlands
3300032783 assembled Ga0335079_10004242	3300032783	Soil microbial communities from Loxahatchee National Wildlife Refuge, Florida, United States - Lox_Sample_3.3 (*) (MER-FS) (assembled)	18	16480	0.54	11	Bacteria							0.61	Environmental	Terrestrial	Soil	Wetlands
3300032805 assembled Ga0335078_10007301	3300032805	Soil microbial communities from Loxahatchee National Wildlife Refuge, Florida, United States - Lox_Sample_3.2 (*) (MER-FS) (assembled)	17	16390	0.52	10	Bacteria							0.71	Environmental	Terrestrial	Soil	Wetlands
3300032782 assembled Ga0335082_10003832	3300032782	Soil microbial communities from Loxahatchee National Wildlife Refuge, Florida, United States - Lox_Sample_4.1 (*) (MER-FS) (assembled)	20	16375	0.67	17	Bacteria	Proteobacteria	Betaproteobacteria					0.6	Environmental	Terrestrial	Soil	Wetlands
3300032892 assembled Ga0335081_10008718	3300032892	Soil microbial communities from Loxahatchee National Wildlife Refuge, Florida, United States - Lox_Sample_3.5 (*) (MER-FS) (assembled)	17	16269	0.63	25	Bacteria							0.88	Environmental	Terrestrial	Soil	Wetlands
3300032770 assembled Ga0335085_10011251	3300032770	Soil microbial communities from Loxahatchee National Wildlife Refuge, Florida, United States - Lox_Sample_4.5 (*) (MER-FS) (assembled)	16	13296	0.67	14									Environmental	Terrestrial	Soil	Wetlands
3300032829 assembled Ga0335070_10007388	3300032829	Soil microbial communities from Loxahatchee National Wildlife Refuge, Florida, United States - Lox_Sample_1.3 (*) (MER-FS) (assembled)	14	12884	0.6	11	Bacteria							0.86	Environmental	Terrestrial	Soil	Wetlands
3300033158 assembled Ga0335077_10008876	3300033158	Soil microbial communities from Loxahatchee National Wildlife Refuge, Florida, United States - Lox_Sample_3.1 (*) (MER-FS) (assembled)	14	12467	0.68	25	Bacteria	Proteobacteria	Betaproteobacteria					0.57	Environmental	Terrestrial	Soil	Wetlands
3300032892 assembled Ga0335081_10016655	3300032892	Soil microbial communities from Loxahatchee National Wildlife Refuge, Florida, United States - Lox_Sample_3.5 (*) (MER-FS) (assembled)	12	11902	0.62	12	Bacteria							0.83	Environmental	Terrestrial	Soil	Wetlands
3300032892 assembled Ga0335081_10017299	3300032892	Soil microbial communities from Loxahatchee National Wildlife Refuge, Florida, United States - Lox_Sample_3.5 (*) (MER-FS) (assembled)	16	11673	0.7	14									Environmental	Terrestrial	Soil	Wetlands
3300032829 assembled Ga0335070_10010057	3300032829	Soil microbial communities from Loxahatchee National Wildlife Refuge, Florida, United States - Lox_Sample_1.3 (*) (MER-FS) (assembled)	11	11064	0.53	25	Bacteria							0.82	Environmental	Terrestrial	Soil	Wetlands
3300032770 assembled Ga0335085_10017143	3300032770	Soil microbial communities from Loxahatchee National Wildlife Refuge, Florida, United States - Lox_Sample_4.5 (*) (MER-FS) (assembled)	13	10446	0.69	15									Environmental	Terrestrial	Soil	Wetlands
3300032897 assembled Ga0335071_10009015	3300032897	Soil microbial communities from Loxahatchee National Wildlife Refuge, Florida, United States - Lox_Sample_1.5 (*) (MER-FS) (assembled)	8	10221	0.51	11	Bacteria	Proteobacteria	Deltaproteobacteria	Syntrophobacterales	Syntrophaceae	Desulfomonile	Desulfomonile tiedjei	1	Environmental	Terrestrial	Soil	Wetlands
3300032895 assembled Ga0335074_10019141	3300032895	Soil microbial communities from Loxahatchee National Wildlife Refuge, Florida, United States - Lox_Sample_2.3 (*) (MER-FS) (assembled)	8	9675	0.62	15	Bacteria	Proteobacteria						0.38	Environmental	Terrestrial	Soil	Wetlands
3300033004 assembled Ga0335084_10009626	3300033004	Soil microbial communities from Loxahatchee National Wildlife Refuge, Florida, United States - Lox_Sample_4.4 (*) (MER-FS) (assembled)	12	9653	0.68	21									Environmental	Terrestrial	Soil	Wetlands
3300033004 assembled Ga0335084_10009896	3300033004	Soil microbial communities from Loxahatchee National Wildlife Refuge, Florida, United States - Lox_Sample_4.4 (*) (MER-FS) (assembled)	10	9543	0.5	17	Bacteria							0.6	Environmental	Terrestrial	Soil	Wetlands
3300032829 assembled Ga0335070_10013846	3300032829	Soil microbial communities from Loxahatchee National Wildlife Refuge, Florida, United States - Lox_Sample_1.3 (*) (MER-FS) (assembled)	12	9393	0.68	13	Bacteria	Proteobacteria	Gammaproteobacteria	Acidiferrobacterales	Acidiferrobacteraceae	Sulfurifustis	Sulfurifustis variabilis	0.58	Environmental	Terrestrial	Soil	Wetlands
3300032897 assembled Ga0335071_10010856	3300032897	Soil microbial communities from Loxahatchee National Wildlife Refuge, Florida, United States - Lox_Sample_1.5 (*) (MER-FS) (assembled)	15	9318	0.63	15									Environmental	Terrestrial	Soil	Wetlands
3300032770 assembled Ga0335085_10021900	3300032770	Soil microbial communities from Loxahatchee National Wildlife Refuge, Florida, United States - Lox_Sample_4.5 (*) (MER-FS) (assembled)	13	9090	0.65	9									Environmental	Terrestrial	Soil	Wetlands
3300032897 assembled Ga0335071_10011659	3300032897	Soil microbial communities from Loxahatchee National Wildlife Refuge, Florida, United States - Lox_Sample_1.5 (*) (MER-FS) (assembled)	9	8980	0.53	13	Bacteria	Proteobacteria	Deltaproteobacteria	Syntrophobacterales	Syntrophaceae	Desulfomonile	Desulfomonile tiedjei	0.78	Environmental	Terrestrial	Soil	Wetlands
3300032770 assembled Ga0335085_10023626	3300032770	Soil microbial communities from Loxahatchee National Wildlife Refuge, Florida, United States - Lox_Sample_4.5 (*) (MER-FS) (assembled)	14	8696	0.56	14	Bacteria	Proteobacteria	Betaproteobacteria	Nitrosomonadales	Gallionellaceae	Sideroxydans	Sideroxydans lithotrophicus	1	Environmental	Terrestrial	Soil	Wetlands
3300032893 assembled Ga0335069_10023217	3300032893	Soil microbial communities from Loxahatchee National Wildlife Refuge, Florida, United States - Lox_Sample_1.1 (*) (MER-FS) (assembled)	15	8536	0.63	20									Environmental	Terrestrial	Soil	Wetlands
3300033004 assembled Ga0335084_10012582	3300033004	Soil microbial communities from Loxahatchee National Wildlife Refuge, Florida, United States - Lox_Sample_4.4 (*) (MER-FS) (assembled)	11	8513	0.66	12	Bacteria	Proteobacteria	Betaproteobacteria					0.64	Environmental	Terrestrial	Soil	Wetlands
3300032892 assembled Ga0335081_10032148	3300032892	Soil microbial communities from Loxahatchee National Wildlife Refuge, Florida, United States - Lox_Sample_3.5 (*) (MER-FS) (assembled)	14	8429	0.69	10									Environmental	Terrestrial	Soil	Wetlands
3300032805 assembled Ga0335078_10027696	3300032805	Soil microbial communities from Loxahatchee National Wildlife Refuge, Florida, United States - Lox_Sample_3.2 (*) (MER-FS) (assembled)	8	8409	0.58	12	Bacteria	Firmicutes	Clostridia					0.38	Environmental	Terrestrial	Soil	Wetlands
3300033004 assembled Ga0335084_10013250	3300033004	Soil microbial communities from Loxahatchee National Wildlife Refuge, Florida, United States - Lox_Sample_4.4 (*) (MER-FS) (assembled)	8	8293	0.68	13	Bacteria	Firmicutes	Clostridia	Thermoanaerobacterales	Thermoanaerobacteraceae			0.38	Environmental	Terrestrial	Soil	Wetlands
3300032805 assembled Ga0335078_10028673	3300032805	Soil microbial communities from Loxahatchee National Wildlife Refuge, Florida, United States - Lox_Sample_3.2 (*) (MER-FS) (assembled)	7	8261	0.63	17	Bacteria	Proteobacteria	Deltaproteobacteria					0.43	Environmental	Terrestrial	Soil	Wetlands
3300032893 assembled Ga0335069_10025111	3300032893	Soil microbial communities from Loxahatchee National Wildlife Refuge, Florida, United States - Lox_Sample_1.1 (*) (MER-FS) (assembled)	13	8168	0.69	17									Environmental	Terrestrial	Soil	Wetlands
3300032893 assembled Ga0335069_10025366	3300032893	Soil microbial communities from Loxahatchee National Wildlife Refuge, Florida, United States - Lox_Sample_1.1 (*) (MER-FS) (assembled)	9	8124	0.64	28	Bacteria							0.67	Environmental	Terrestrial	Soil	Wetlands
3300032829 assembled Ga0335070_10020418	3300032829	Soil microbial communities from Loxahatchee National Wildlife Refuge, Florida, United States - Lox_Sample_1.3 (*) (MER-FS) (assembled)	9	7658	0.5	7	Archaea	Aigarchaeota	unclassified	unclassified	unclassified	unclassified	unclassified	0.56	Environmental	Terrestrial	Soil	Wetlands
3300033004 assembled Ga0335084_10015672	3300033004	Soil microbial communities from Loxahatchee National Wildlife Refuge, Florida, United States - Lox_Sample_4.4 (*) (MER-FS) (assembled)	12	7654	0.68	10									Environmental	Terrestrial	Soil	Wetlands
3300032770 assembled Ga0335085_10033081	3300032770	Soil microbial communities from Loxahatchee National Wildlife Refuge, Florida, United States - Lox_Sample_4.5 (*) (MER-FS) (assembled)	10	7180	0.7	11	Bacteria	Proteobacteria	Betaproteobacteria	Burkholderiales				1	Environmental	Terrestrial	Soil	Wetlands
3300032829 assembled Ga0335070_10024848	3300032829	Soil microbial communities from Loxahatchee National Wildlife Refuge, Florida, United States - Lox_Sample_1.3 (*) (MER-FS) (assembled)	10	6884	0.54	10	Bacteria							0.8	Environmental	Terrestrial	Soil	Wetlands
3300032782 assembled Ga0335082_10021826	3300032782	Soil microbial communities from Loxahatchee National Wildlife Refuge, Florida, United States - Lox_Sample_4.1 (*) (MER-FS) (assembled)	11	6880	0.7	56									Environmental	Terrestrial	Soil	Wetlands
3300032954 assembled Ga0335083_10024654	3300032954	Soil microbial communities from Loxahatchee National Wildlife Refuge, Florida, United States - Lox_Sample_4.2 (*) (MER-FS) (assembled)	8	6821	0.56	14	Bacteria	Proteobacteria						0.38	Environmental	Terrestrial	Soil	Wetlands
3300032892 assembled Ga0335081_10047031	3300032892	Soil microbial communities from Loxahatchee National Wildlife Refuge, Florida, United States - Lox_Sample_3.5 (*) (MER-FS) (assembled)	8	6796	0.51	10	Bacteria	Caldiserica	unclassified	unclassified	unclassified	unclassified	unclassified	0.5	Environmental	Terrestrial	Soil	Wetlands
3300032892 assembled Ga0335081_10047045	3300032892	Soil microbial communities from Loxahatchee National Wildlife Refuge, Florida, United States - Lox_Sample_3.5 (*) (MER-FS) (assembled)	9	6794	0.68	14	Bacteria	Proteobacteria	Betaproteobacteria	Nitrosomonadales				0.33	Environmental	Terrestrial	Soil	Wetlands
3300033004 assembled Ga0335084_10020950	3300033004	Soil microbial communities from Loxahatchee National Wildlife Refuge, Florida, United States - Lox_Sample_4.4 (*) (MER-FS) (assembled)	11	6643	0.67	10									Environmental	Terrestrial	Soil	Wetlands
3300033004 assembled Ga0335084_10021000	3300033004	Soil microbial communities from Loxahatchee National Wildlife Refuge, Florida, United States - Lox_Sample_4.4 (*) (MER-FS) (assembled)	12	6636	0.66	14	Bacteria	Proteobacteria	Betaproteobacteria					0.67	Environmental	Terrestrial	Soil	Wetlands
3300032897 assembled Ga0335071_10021442	3300032897	Soil microbial communities from Loxahatchee National Wildlife Refuge, Florida, United States - Lox_Sample_1.5 (*) (MER-FS) (assembled)	5	6480	0.49	11	Bacteria							0.6	Environmental	Terrestrial	Soil	Wetlands
3300032805 assembled Ga0335078_10047054	3300032805	Soil microbial communities from Loxahatchee National Wildlife Refuge, Florida, United States - Lox_Sample_3.2 (*) (MER-FS) (assembled)	8	6393	0.62	20	Bacteria	Firmicutes	Clostridia	Thermoanaerobacterales	Thermoanaerobacteraceae			0.38	Environmental	Terrestrial	Soil	Wetlands
3300033134 assembled Ga0335073_10040551	3300033134	Soil microbial communities from Loxahatchee National Wildlife Refuge, Florida, United States - Lox_Sample_2.2 (*) (MER-FS) (assembled)	6	6303	0.64	20	Bacteria							0.67	Environmental	Terrestrial	Soil	Wetlands
3300032829 assembled Ga0335070_10029487	3300032829	Soil microbial communities from Loxahatchee National Wildlife Refuge, Florida, United States - Lox_Sample_1.3 (*) (MER-FS) (assembled)	8	6262	0.69	9	Bacteria	Proteobacteria	Deltaproteobacteria					0.5	Environmental	Terrestrial	Soil	Wetlands
3300032892 assembled Ga0335081_10054796	3300032892	Soil microbial communities from Loxahatchee National Wildlife Refuge, Florida, United States - Lox_Sample_3.5 (*) (MER-FS) (assembled)	8	6221	0.55	12	Bacteria	Caldiserica	unclassified	unclassified	unclassified	unclassified	unclassified	0.38	Environmental	Terrestrial	Soil	Wetlands
3300032770 assembled Ga0335085_10042741	3300032770	Soil microbial communities from Loxahatchee National Wildlife Refuge, Florida, United States - Lox_Sample_4.5 (*) (MER-FS) (assembled)	6	6198	0.51	12	Bacteria	Caldiserica	unclassified	unclassified	unclassified	unclassified	unclassified	0.5	Environmental	Terrestrial	Soil	Wetlands
3300032893 assembled Ga0335069_10041594	3300032893	Soil microbial communities from Loxahatchee National Wildlife Refuge, Florida, United States - Lox_Sample_1.1 (*) (MER-FS) (assembled)	8	6117	0.62	33	Bacteria	Firmicutes	Clostridia					0.38	Environmental	Terrestrial	Soil	Wetlands
3300032828 assembled Ga0335080_10028432	3300032828	Soil microbial communities from Loxahatchee National Wildlife Refuge, Florida, United States - Lox_Sample_3.4 (*) (MER-FS) (assembled)	7	6095	0.61	13	Bacteria	Firmicutes						0.57	Environmental	Terrestrial	Soil	Wetlands
3300032805 assembled Ga0335078_10054368	3300032805	Soil microbial communities from Loxahatchee National Wildlife Refuge, Florida, United States - Lox_Sample_3.2 (*) (MER-FS) (assembled)	7	5904	0.61	9	Bacteria	Proteobacteria	Deltaproteobacteria					0.43	Environmental	Terrestrial	Soil	Wetlands
3300032782 assembled Ga0335082_10029425	3300032782	Soil microbial communities from Loxahatchee National Wildlife Refuge, Florida, United States - Lox_Sample_4.1 (*) (MER-FS) (assembled)	9	5838	0.59	7	Bacteria	Proteobacteria	Deltaproteobacteria	Syntrophobacterales	Syntrophobacteraceae			0.44	Environmental	Terrestrial	Soil	Wetlands
3300032782 assembled Ga0335082_10029430	3300032782	Soil microbial communities from Loxahatchee National Wildlife Refuge, Florida, United States - Lox_Sample_4.1 (*) (MER-FS) (assembled)	6	5837	0.68	15	Bacteria	Firmicutes	Clostridia	Clostridiales				0.5	Environmental	Terrestrial	Soil	Wetlands
3300032892 assembled Ga0335081_10061782	3300032892	Soil microbial communities from Loxahatchee National Wildlife Refuge, Florida, United States - Lox_Sample_3.5 (*) (MER-FS) (assembled)	9	5799	0.47	9	Bacteria	Caldiserica	unclassified	unclassified	unclassified	unclassified	unclassified	0.44	Environmental	Terrestrial	Soil	Wetlands
3300033004 assembled Ga0335084_10028262	3300033004	Soil microbial communities from Loxahatchee National Wildlife Refuge, Florida, United States - Lox_Sample_4.4 (*) (MER-FS) (assembled)	6	5727	0.6	10	Bacteria	Proteobacteria	Deltaproteobacteria	Desulfobacterales	Desulfobacteraceae			0.83	Environmental	Terrestrial	Soil	Wetlands
3300032770 assembled Ga0335085_10049650	3300032770	Soil microbial communities from Loxahatchee National Wildlife Refuge, Florida, United States - Lox_Sample_4.5 (*) (MER-FS) (assembled)	5	5682	0.64	8	Bacteria							0.6	Environmental	Terrestrial	Soil	Wetlands
3300032783 assembled Ga0335079_10036862	3300032783	Soil microbial communities from Loxahatchee National Wildlife Refuge, Florida, United States - Lox_Sample_3.3 (*) (MER-FS) (assembled)	9	5617	0.49	8	Bacteria							0.33	Environmental	Terrestrial	Soil	Wetlands
3300032828 assembled Ga0335080_10035610	3300032828	Soil microbial communities from Loxahatchee National Wildlife Refuge, Florida, United States - Lox_Sample_3.4 (*) (MER-FS) (assembled)	6	5460	0.59	9	Bacteria							0.5	Environmental	Terrestrial	Soil	Wetlands
3300032770 assembled Ga0335085_10053351	3300032770	Soil microbial communities from Loxahatchee National Wildlife Refuge, Florida, United States - Lox_Sample_4.5 (*) (MER-FS) (assembled)	5	5448	0.68	10	Bacteria							0.6	Environmental	Terrestrial	Soil	Wetlands
3300033004 assembled Ga0335084_10032434	3300033004	Soil microbial communities from Loxahatchee National Wildlife Refuge, Florida, United States - Lox_Sample_4.4 (*) (MER-FS) (assembled)	9	5353	0.68	12	Bacteria	Proteobacteria	Betaproteobacteria	Burkholderiales	Comamonadaceae	Curvibacter	Curvibacter sp. PAE-UM	0.44	Environmental	Terrestrial	Soil	Wetlands
3300032829 assembled Ga0335070_10038785	3300032829	Soil microbial communities from Loxahatchee National Wildlife Refuge, Florida, United States - Lox_Sample_1.3 (*) (MER-FS) (assembled)	11	5340	0.69	8	Bacteria	Proteobacteria	Betaproteobacteria	Nitrosomonadales				0.55	Environmental	Terrestrial	Soil	Wetlands
3300032770 assembled Ga0335085_10055280	3300032770	Soil microbial communities from Loxahatchee National Wildlife Refuge, Florida, United States - Lox_Sample_4.5 (*) (MER-FS) (assembled)	6	5336	0.69	12	Bacteria	Firmicutes	Clostridia	Clostridiales	Peptococcaceae			0.5	Environmental	Terrestrial	Soil	Wetlands
3300032829 assembled Ga0335070_10038879	3300032829	Soil microbial communities from Loxahatchee National Wildlife Refuge, Florida, United States - Lox_Sample_1.3 (*) (MER-FS) (assembled)	4	5330	0.66	16	Bacteria							0.75	Environmental	Terrestrial	Soil	Wetlands
3300033004 assembled Ga0335084_10033165	3300033004	Soil microbial communities from Loxahatchee National Wildlife Refuge, Florida, United States - Lox_Sample_4.4 (*) (MER-FS) (assembled)	8	5292	0.55	11	Bacteria	Proteobacteria	Betaproteobacteria	Nitrosomonadales	Gallionellaceae	Sideroxydans	Sideroxydans lithotrophicus	1	Environmental	Terrestrial	Soil	Wetlands
3300032897 assembled Ga0335071_10031525	3300032897	Soil microbial communities from Loxahatchee National Wildlife Refuge, Florida, United States - Lox_Sample_1.5 (*) (MER-FS) (assembled)	7	5275	0.54	15	Bacteria	Caldiserica	unclassified	unclassified	unclassified	unclassified	unclassified	0.43	Environmental	Terrestrial	Soil	Wetlands
3300032770 assembled Ga0335085_10056510	3300032770	Soil microbial communities from Loxahatchee National Wildlife Refuge, Florida, United States - Lox_Sample_4.5 (*) (MER-FS) (assembled)	11	5268	0.67	12	Bacteria	Proteobacteria						0.73	Environmental	Terrestrial	Soil	Wetlands
3300033004 assembled Ga0335084_10034339	3300033004	Soil microbial communities from Loxahatchee National Wildlife Refuge, Florida, United States - Lox_Sample_4.4 (*) (MER-FS) (assembled)	6	5202	0.5	11	Bacteria	Caldiserica	unclassified	unclassified	unclassified	unclassified	unclassified	0.5	Environmental	Terrestrial	Soil	Wetlands
3300032829 assembled Ga0335070_10041405	3300032829	Soil microbial communities from Loxahatchee National Wildlife Refuge, Florida, United States - Lox_Sample_1.3 (*) (MER-FS) (assembled)	6	5142	0.54	11	Bacteria	Caldiserica	unclassified	unclassified	unclassified	unclassified	unclassified	0.5	Environmental	Terrestrial	Soil	Wetlands
3300032892 assembled Ga0335081_10079330	3300032892	Soil microbial communities from Loxahatchee National Wildlife Refuge, Florida, United States - Lox_Sample_3.5 (*) (MER-FS) (assembled)	5	4974	0.66	15	Bacteria	Proteobacteria	Deltaproteobacteria					0.6	Environmental	Terrestrial	Soil	Wetlands
3300032829 assembled Ga0335070_10044401	3300032829	Soil microbial communities from Loxahatchee National Wildlife Refuge, Florida, United States - Lox_Sample_1.3 (*) (MER-FS) (assembled)	9	4935	0.67	26	Bacteria	Proteobacteria	Betaproteobacteria	Burkholderiales	unclassified	unclassified	Burkholderiales bacterium JOSHI_001	0.44	Environmental	Terrestrial	Soil	Wetlands
3300032897 assembled Ga0335071_10035912	3300032897	Soil microbial communities from Loxahatchee National Wildlife Refuge, Florida, United States - Lox_Sample_1.5 (*) (MER-FS) (assembled)	5	4916	0.54	12	Bacteria							0.6	Environmental	Terrestrial	Soil	Wetlands
3300033004 assembled Ga0335084_10038447	3300033004	Soil microbial communities from Loxahatchee National Wildlife Refuge, Florida, United States - Lox_Sample_4.4 (*) (MER-FS) (assembled)	6	4915	0.54	14	Bacteria	Nitrospirae	Nitrospira	Nitrospirales	Nitrospiraceae			0.5	Environmental	Terrestrial	Soil	Wetlands
3300032954 assembled Ga0335083_10042482	3300032954	Soil microbial communities from Loxahatchee National Wildlife Refuge, Florida, United States - Lox_Sample_4.2 (*) (MER-FS) (assembled)	8	4908	0.61	13	Bacteria	Proteobacteria	Alphaproteobacteria	Rhizobiales	Hyphomicrobiaceae	Rhodomicrobium	Rhodomicrobium vannielii	0.38	Environmental	Terrestrial	Soil	Wetlands
3300032783 assembled Ga0335079_10049570	3300032783	Soil microbial communities from Loxahatchee National Wildlife Refuge, Florida, United States - Lox_Sample_3.3 (*) (MER-FS) (assembled)	7	4811	0.61	13	Bacteria							0.43	Environmental	Terrestrial	Soil	Wetlands
3300032892 assembled Ga0335081_10084782	3300032892	Soil microbial communities from Loxahatchee National Wildlife Refuge, Florida, United States - Lox_Sample_3.5 (*) (MER-FS) (assembled)	5	4778	0.7	10	Bacteria	Proteobacteria						0.6	Environmental	Terrestrial	Soil	Wetlands
3300032897 assembled Ga0335071_10038716	3300032897	Soil microbial communities from Loxahatchee National Wildlife Refuge, Florida, United States - Lox_Sample_1.5 (*) (MER-FS) (assembled)	6	4721	0.65	8	Bacteria	Proteobacteria	Betaproteobacteria	Burkholderiales	unclassified	unclassified	Burkholderiales bacterium GJ-E10	0.5	Environmental	Terrestrial	Soil	Wetlands
3300032770 assembled Ga0335085_10069994	3300032770	Soil microbial communities from Loxahatchee National Wildlife Refuge, Florida, United States - Lox_Sample_4.5 (*) (MER-FS) (assembled)	6	4646	0.61	11	Bacteria	Proteobacteria	Alphaproteobacteria	Rhizobiales	Hyphomicrobiaceae	Rhodomicrobium		0.67	Environmental	Terrestrial	Soil	Wetlands
3300032893 assembled Ga0335069_10067586	3300032893	Soil microbial communities from Loxahatchee National Wildlife Refuge, Florida, United States - Lox_Sample_1.1 (*) (MER-FS) (assembled)	8	4611	0.65	11	Bacteria	Proteobacteria	Alphaproteobacteria	Rhizobiales	Hyphomicrobiaceae	Rhodomicrobium	Rhodomicrobium udaipurense	0.5	Environmental	Terrestrial	Soil	Wetlands
3300032897 assembled Ga0335071_10042247	3300032897	Soil microbial communities from Loxahatchee National Wildlife Refuge, Florida, United States - Lox_Sample_1.5 (*) (MER-FS) (assembled)	4	4507	0.65	9	Bacteria	Proteobacteria	Deltaproteobacteria	Desulfobacterales	Desulfobacteraceae			0.75	Environmental	Terrestrial	Soil	Wetlands
3300033158 assembled Ga0335077_10064095	3300033158	Soil microbial communities from Loxahatchee National Wildlife Refuge, Florida, United States - Lox_Sample_3.1 (*) (MER-FS) (assembled)	6	4413	0.57	9	Bacteria							0.5	Environmental	Terrestrial	Soil	Wetlands
3300032770 assembled Ga0335085_10076682	3300032770	Soil microbial communities from Loxahatchee National Wildlife Refuge, Florida, United States - Lox_Sample_4.5 (*) (MER-FS) (assembled)	5	4402	0.62	15									Environmental	Terrestrial	Soil	Wetlands
3300032782 assembled Ga0335082_10049195	3300032782	Soil microbial communities from Loxahatchee National Wildlife Refuge, Florida, United States - Lox_Sample_4.1 (*) (MER-FS) (assembled)	8	4368	0.65	13	Bacteria	Proteobacteria	Betaproteobacteria	Burkholderiales				0.5	Environmental	Terrestrial	Soil	Wetlands
3300032783 assembled Ga0335079_10062616	3300032783	Soil microbial communities from Loxahatchee National Wildlife Refuge, Florida, United States - Lox_Sample_3.3 (*) (MER-FS) (assembled)	4	4240	0.54	6	Bacteria	Firmicutes	Clostridia					0.75	Environmental	Terrestrial	Soil	Wetlands
3300032829 assembled Ga0335070_10060955	3300032829	Soil microbial communities from Loxahatchee National Wildlife Refuge, Florida, United States - Lox_Sample_1.3 (*) (MER-FS) (assembled)	4	4097	0.49	15									Environmental	Terrestrial	Soil	Wetlands
3300033004 assembled Ga0335084_10056744	3300033004	Soil microbial communities from Loxahatchee National Wildlife Refuge, Florida, United States - Lox_Sample_4.4 (*) (MER-FS) (assembled)	2	4043	0.49	12	Bacteria	Nitrospirae	Nitrospira	Nitrospirales	Nitrospiraceae	Candidatus Magnetobacterium	Candidatus Magnetobacterium casensis	1	Environmental	Terrestrial	Soil	Wetlands
3300032897 assembled Ga0335071_10052914	3300032897	Soil microbial communities from Loxahatchee National Wildlife Refuge, Florida, United States - Lox_Sample_1.5 (*) (MER-FS) (assembled)	8	4004	0.65	10	Bacteria	Proteobacteria	Betaproteobacteria					0.38	Environmental	Terrestrial	Soil	Wetlands
3300032783 assembled Ga0335079_10070178	3300032783	Soil microbial communities from Loxahatchee National Wildlife Refuge, Florida, United States - Lox_Sample_3.3 (*) (MER-FS) (assembled)	4	3990	0.6	8									Environmental	Terrestrial	Soil	Wetlands
3300033158 assembled Ga0335077_10076702	3300033158	Soil microbial communities from Loxahatchee National Wildlife Refuge, Florida, United States - Lox_Sample_3.1 (*) (MER-FS) (assembled)	7	3979	0.69	7									Environmental	Terrestrial	Soil	Wetlands
3300032892 assembled Ga0335081_10116222	3300032892	Soil microbial communities from Loxahatchee National Wildlife Refuge, Florida, United States - Lox_Sample_3.5 (*) (MER-FS) (assembled)	4	3926	0.64	16									Environmental	Terrestrial	Soil	Wetlands
3300032770 assembled Ga0335085_10095099	3300032770	Soil microbial communities from Loxahatchee National Wildlife Refuge, Florida, United States - Lox_Sample_4.5 (*) (MER-FS) (assembled)	5	3869	0.61	12	Bacteria							0.8	Environmental	Terrestrial	Soil	Wetlands
3300032893 assembled Ga0335069_10091457	3300032893	Soil microbial communities from Loxahatchee National Wildlife Refuge, Florida, United States - Lox_Sample_1.1 (*) (MER-FS) (assembled)	5	3861	0.54	17									Environmental	Terrestrial	Soil	Wetlands
3300032782 assembled Ga0335082_10061916	3300032782	Soil microbial communities from Loxahatchee National Wildlife Refuge, Florida, United States - Lox_Sample_4.1 (*) (MER-FS) (assembled)	6	3819	0.66	15									Environmental	Terrestrial	Soil	Wetlands
3300032782 assembled Ga0335082_10063722	3300032782	Soil microbial communities from Loxahatchee National Wildlife Refuge, Florida, United States - Lox_Sample_4.1 (*) (MER-FS) (assembled)	5	3756	0.56	10	Bacteria	Proteobacteria	Betaproteobacteria	Nitrosomonadales	Gallionellaceae	Sideroxydans	Sideroxydans lithotrophicus	1	Environmental	Terrestrial	Soil	Wetlands
3300032783 assembled Ga0335079_10078706	3300032783	Soil microbial communities from Loxahatchee National Wildlife Refuge, Florida, United States - Lox_Sample_3.3 (*) (MER-FS) (assembled)	4	3748	0.63	25	Bacteria							0.75	Environmental	Terrestrial	Soil	Wetlands
3300032783 assembled Ga0335079_10078957	3300032783	Soil microbial communities from Loxahatchee National Wildlife Refuge, Florida, United States - Lox_Sample_3.3 (*) (MER-FS) (assembled)	3	3741	0.48	9									Environmental	Terrestrial	Soil	Wetlands
3300032897 assembled Ga0335071_10060496	3300032897	Soil microbial communities from Loxahatchee National Wildlife Refuge, Florida, United States - Lox_Sample_1.5 (*) (MER-FS) (assembled)	6	3726	0.6	29	Bacteria	Proteobacteria	Alphaproteobacteria	Rhizobiales	Hyphomicrobiaceae	Rhodomicrobium	Rhodomicrobium vannielii	0.5	Environmental	Terrestrial	Soil	Wetlands
3300032770 assembled Ga0335085_10102917	3300032770	Soil microbial communities from Loxahatchee National Wildlife Refuge, Florida, United States - Lox_Sample_4.5 (*) (MER-FS) (assembled)	4	3688	0.57	8									Environmental	Terrestrial	Soil	Wetlands
3300032898 assembled Ga0335072_10101810	3300032898	Soil microbial communities from Loxahatchee National Wildlife Refuge, Florida, United States - Lox_Sample_2.1 (*) (MER-FS) (assembled)	5	3671	0.61	17									Environmental	Terrestrial	Soil	Wetlands
3300032805 assembled Ga0335078_10125451	3300032805	Soil microbial communities from Loxahatchee National Wildlife Refuge, Florida, United States - Lox_Sample_3.2 (*) (MER-FS) (assembled)	4	3668	0.65	12	Bacteria							1	Environmental	Terrestrial	Soil	Wetlands
3300033158 assembled Ga0335077_10088179	3300033158	Soil microbial communities from Loxahatchee National Wildlife Refuge, Florida, United States - Lox_Sample_3.1 (*) (MER-FS) (assembled)	4	3667	0.68	7									Environmental	Terrestrial	Soil	Wetlands
3300032892 assembled Ga0335081_10129866	3300032892	Soil microbial communities from Loxahatchee National Wildlife Refuge, Florida, United States - Lox_Sample_3.5 (*) (MER-FS) (assembled)	7	3657	0.68	11	Bacteria	Proteobacteria	Betaproteobacteria	Burkholderiales	unclassified	unclassified		0.43	Environmental	Terrestrial	Soil	Wetlands
3300032783 assembled Ga0335079_10082348	3300032783	Soil microbial communities from Loxahatchee National Wildlife Refuge, Florida, United States - Lox_Sample_3.3 (*) (MER-FS) (assembled)	4	3656	0.68	7									Environmental	Terrestrial	Soil	Wetlands
3300032829 assembled Ga0335070_10073841	3300032829	Soil microbial communities from Loxahatchee National Wildlife Refuge, Florida, United States - Lox_Sample_1.3 (*) (MER-FS) (assembled)	4	3654	0.68	10	Bacteria							0.75	Environmental	Terrestrial	Soil	Wetlands
3300032829 assembled Ga0335070_10074890	3300032829	Soil microbial communities from Loxahatchee National Wildlife Refuge, Florida, United States - Lox_Sample_1.3 (*) (MER-FS) (assembled)	7	3622	0.56	10	Bacteria							0.57	Environmental	Terrestrial	Soil	Wetlands
3300032893 assembled Ga0335069_10104686	3300032893	Soil microbial communities from Loxahatchee National Wildlife Refuge, Florida, United States - Lox_Sample_1.1 (*) (MER-FS) (assembled)	7	3568	0.64	16	Bacteria	Proteobacteria	Alphaproteobacteria	Rhizobiales	Hyphomicrobiaceae	Rhodomicrobium		0.57	Environmental	Terrestrial	Soil	Wetlands
3300032770 assembled Ga0335085_10111582	3300032770	Soil microbial communities from Loxahatchee National Wildlife Refuge, Florida, United States - Lox_Sample_4.5 (*) (MER-FS) (assembled)	7	3508	0.66	10	Bacteria	Proteobacteria	Betaproteobacteria	Burkholderiales	unclassified	unclassified		0.43	Environmental	Terrestrial	Soil	Wetlands
3300032782 assembled Ga0335082_10072991	3300032782	Soil microbial communities from Loxahatchee National Wildlife Refuge, Florida, United States - Lox_Sample_4.1 (*) (MER-FS) (assembled)	6	3468	0.69	11	Bacteria	Proteobacteria	Betaproteobacteria	Burkholderiales	Comamonadaceae	Curvibacter	Curvibacter sp. PAE-UM	0.67	Environmental	Terrestrial	Soil	Wetlands
3300032770 assembled Ga0335085_10116191	3300032770	Soil microbial communities from Loxahatchee National Wildlife Refuge, Florida, United States - Lox_Sample_4.5 (*) (MER-FS) (assembled)	5	3425	0.58	7	Bacteria	Nitrospirae	Nitrospira	Nitrospirales	Nitrospiraceae			0.6	Environmental	Terrestrial	Soil	Wetlands
3300033004 assembled Ga0335084_10079749	3300033004	Soil microbial communities from Loxahatchee National Wildlife Refuge, Florida, United States - Lox_Sample_4.4 (*) (MER-FS) (assembled)	4	3394	0.56	8	Bacteria	Caldiserica	unclassified	unclassified	unclassified	unclassified	unclassified	0.75	Environmental	Terrestrial	Soil	Wetlands
3300032893 assembled Ga0335069_10114542	3300032893	Soil microbial communities from Loxahatchee National Wildlife Refuge, Florida, United States - Lox_Sample_1.1 (*) (MER-FS) (assembled)	2	3387	0.48	6									Environmental	Terrestrial	Soil	Wetlands
3300032782 assembled Ga0335082_10076146	3300032782	Soil microbial communities from Loxahatchee National Wildlife Refuge, Florida, United States - Lox_Sample_4.1 (*) (MER-FS) (assembled)	4	3385	0.48	14									Environmental	Terrestrial	Soil	Wetlands
3300032893 assembled Ga0335069_10114719	3300032893	Soil microbial communities from Loxahatchee National Wildlife Refuge, Florida, United States - Lox_Sample_1.1 (*) (MER-FS) (assembled)	4	3383	0.56	7	Bacteria							0.75	Environmental	Terrestrial	Soil	Wetlands
3300032897 assembled Ga0335071_10073801	3300032897	Soil microbial communities from Loxahatchee National Wildlife Refuge, Florida, United States - Lox_Sample_1.5 (*) (MER-FS) (assembled)	4	3346	0.5	10	Bacteria	Proteobacteria	Deltaproteobacteria	Syntrophobacterales	Syntrophobacteraceae			0.75	Environmental	Terrestrial	Soil	Wetlands
3300033134 assembled Ga0335073_10122444	3300033134	Soil microbial communities from Loxahatchee National Wildlife Refuge, Florida, United States - Lox_Sample_2.2 (*) (MER-FS) (assembled)	5	3332	0.63	13	Bacteria							0.6	Environmental	Terrestrial	Soil	Wetlands
3300032805 assembled Ga0335078_10147587	3300032805	Soil microbial communities from Loxahatchee National Wildlife Refuge, Florida, United States - Lox_Sample_3.2 (*) (MER-FS) (assembled)	3	3331	0.61	11	Bacteria	Firmicutes	Clostridia	Thermoanaerobacterales	Thermoanaerobacteraceae			0.67	Environmental	Terrestrial	Soil	Wetlands
3300032897 assembled Ga0335071_10074525	3300032897	Soil microbial communities from Loxahatchee National Wildlife Refuge, Florida, United States - Lox_Sample_1.5 (*) (MER-FS) (assembled)	5	3327	0.61	11	Bacteria	Proteobacteria	Deltaproteobacteria					0.6	Environmental	Terrestrial	Soil	Wetlands
3300032897 assembled Ga0335071_10076568	3300032897	Soil microbial communities from Loxahatchee National Wildlife Refuge, Florida, United States - Lox_Sample_1.5 (*) (MER-FS) (assembled)	4	3280	0.55	15									Environmental	Terrestrial	Soil	Wetlands
3300032897 assembled Ga0335071_10076868	3300032897	Soil microbial communities from Loxahatchee National Wildlife Refuge, Florida, United States - Lox_Sample_1.5 (*) (MER-FS) (assembled)	4	3274	0.66	14									Environmental	Terrestrial	Soil	Wetlands
3300032897 assembled Ga0335071_10077225	3300032897	Soil microbial communities from Loxahatchee National Wildlife Refuge, Florida, United States - Lox_Sample_1.5 (*) (MER-FS) (assembled)	4	3266	0.64	12									Environmental	Terrestrial	Soil	Wetlands
3300032898 assembled Ga0335072_10122301	3300032898	Soil microbial communities from Loxahatchee National Wildlife Refuge, Florida, United States - Lox_Sample_2.1 (*) (MER-FS) (assembled)	3	3266	0.63	15	Bacteria	Proteobacteria	Deltaproteobacteria					0.67	Environmental	Terrestrial	Soil	Wetlands
3300033158 assembled Ga0335077_10111796	3300033158	Soil microbial communities from Loxahatchee National Wildlife Refuge, Florida, United States - Lox_Sample_3.1 (*) (MER-FS) (assembled)	4	3189	0.63	19	Bacteria							0.75	Environmental	Terrestrial	Soil	Wetlands
3300033134 assembled Ga0335073_10133325	3300033134	Soil microbial communities from Loxahatchee National Wildlife Refuge, Florida, United States - Lox_Sample_2.2 (*) (MER-FS) (assembled)	5	3169	0.62	9	Bacteria							0.8	Environmental	Terrestrial	Soil	Wetlands
3300032893 assembled Ga0335069_10130422	3300032893	Soil microbial communities from Loxahatchee National Wildlife Refuge, Florida, United States - Lox_Sample_1.1 (*) (MER-FS) (assembled)	5	3137	0.6	38	Bacteria	Proteobacteria	Alphaproteobacteria	Rhizobiales	Hyphomicrobiaceae	Rhodomicrobium		0.6	Environmental	Terrestrial	Soil	Wetlands
3300032782 assembled Ga0335082_10088478	3300032782	Soil microbial communities from Loxahatchee National Wildlife Refuge, Florida, United States - Lox_Sample_4.1 (*) (MER-FS) (assembled)	3	3096	0.61	7	Bacteria	Proteobacteria	Deltaproteobacteria	Syntrophobacterales				0.67	Environmental	Terrestrial	Soil	Wetlands
3300032770 assembled Ga0335085_10137633	3300032770	Soil microbial communities from Loxahatchee National Wildlife Refuge, Florida, United States - Lox_Sample_4.5 (*) (MER-FS) (assembled)	4	3086	0.56	18									Environmental	Terrestrial	Soil	Wetlands
3300032892 assembled Ga0335081_10170837	3300032892	Soil microbial communities from Loxahatchee National Wildlife Refuge, Florida, United States - Lox_Sample_3.5 (*) (MER-FS) (assembled)	3	3067	0.59	6	Bacteria							0.67	Environmental	Terrestrial	Soil	Wetlands
3300032893 assembled Ga0335069_10140249	3300032893	Soil microbial communities from Loxahatchee National Wildlife Refuge, Florida, United States - Lox_Sample_1.1 (*) (MER-FS) (assembled)	4	3005	0.57	11	Bacteria							0.75	Environmental	Terrestrial	Soil	Wetlands
3300032805 assembled Ga0335078_10179214	3300032805	Soil microbial communities from Loxahatchee National Wildlife Refuge, Florida, United States - Lox_Sample_3.2 (*) (MER-FS) (assembled)	3	2967	0.62	7	Bacteria	Proteobacteria	Deltaproteobacteria					1	Environmental	Terrestrial	Soil	Wetlands
3300032892 assembled Ga0335081_10183977	3300032892	Soil microbial communities from Loxahatchee National Wildlife Refuge, Florida, United States - Lox_Sample_3.5 (*) (MER-FS) (assembled)	3	2921	0.62	11									Environmental	Terrestrial	Soil	Wetlands
3300032897 assembled Ga0335071_10097087	3300032897	Soil microbial communities from Loxahatchee National Wildlife Refuge, Florida, United States - Lox_Sample_1.5 (*) (MER-FS) (assembled)	3	2890	0.64	5	Bacteria	Proteobacteria	Deltaproteobacteria					1	Environmental	Terrestrial	Soil	Wetlands
3300033004 assembled Ga0335084_10109343	3300033004	Soil microbial communities from Loxahatchee National Wildlife Refuge, Florida, United States - Lox_Sample_4.4 (*) (MER-FS) (assembled)	4	2874	0.7	7									Environmental	Terrestrial	Soil	Wetlands
3300032805 assembled Ga0335078_10190773	3300032805	Soil microbial communities from Loxahatchee National Wildlife Refuge, Florida, United States - Lox_Sample_3.2 (*) (MER-FS) (assembled)	3	2857	0.64	16	Bacteria							0.67	Environmental	Terrestrial	Soil	Wetlands
3300032829 assembled Ga0335070_10111290	3300032829	Soil microbial communities from Loxahatchee National Wildlife Refuge, Florida, United States - Lox_Sample_1.3 (*) (MER-FS) (assembled)	6	2847	0.6	19	Bacteria	Proteobacteria	Alphaproteobacteria	Rhizobiales	Hyphomicrobiaceae	Rhodomicrobium	Rhodomicrobium vannielii	0.5	Environmental	Terrestrial	Soil	Wetlands
3300032954 assembled Ga0335083_10101082	3300032954	Soil microbial communities from Loxahatchee National Wildlife Refuge, Florida, United States - Lox_Sample_4.2 (*) (MER-FS) (assembled)	3	2841	0.55	8	Bacteria	Nitrospirae	Nitrospira	Nitrospirales	Nitrospiraceae	Thermodesulfovibrio		0.67	Environmental	Terrestrial	Soil	Wetlands
3300032828 assembled Ga0335080_10128793	3300032828	Soil microbial communities from Loxahatchee National Wildlife Refuge, Florida, United States - Lox_Sample_3.4 (*) (MER-FS) (assembled)	5	2808	0.68	9	Bacteria	Proteobacteria	Betaproteobacteria	Burkholderiales				0.6	Environmental	Terrestrial	Soil	Wetlands
3300032897 assembled Ga0335071_10104680	3300032897	Soil microbial communities from Loxahatchee National Wildlife Refuge, Florida, United States - Lox_Sample_1.5 (*) (MER-FS) (assembled)	3	2775	0.64	14	Bacteria	Proteobacteria	Alphaproteobacteria	Rhizobiales	Hyphomicrobiaceae	Rhodomicrobium	Rhodomicrobium vannielii	0.67	Environmental	Terrestrial	Soil	Wetlands
3300032783 assembled Ga0335079_10135359	3300032783	Soil microbial communities from Loxahatchee National Wildlife Refuge, Florida, United States - Lox_Sample_3.3 (*) (MER-FS) (assembled)	4	2774	0.57	10									Environmental	Terrestrial	Soil	Wetlands
3300033158 assembled Ga0335077_10141513	3300033158	Soil microbial communities from Loxahatchee National Wildlife Refuge, Florida, United States - Lox_Sample_3.1 (*) (MER-FS) (assembled)	4	2771	0.62	9	Bacteria							0.75	Environmental	Terrestrial	Soil	Wetlands
3300032893 assembled Ga0335069_10161254	3300032893	Soil microbial communities from Loxahatchee National Wildlife Refuge, Florida, United States - Lox_Sample_1.1 (*) (MER-FS) (assembled)	3	2767	0.65	9	Bacteria	Proteobacteria	Deltaproteobacteria					0.67	Environmental	Terrestrial	Soil	Wetlands
3300032955 assembled Ga0335076_10105195	3300032955	Soil microbial communities from Loxahatchee National Wildlife Refuge, Florida, United States - Lox_Sample_2.5 (*) (MER-FS) (assembled)	3	2750	0.61	8	Bacteria	Firmicutes	Clostridia	Thermoanaerobacterales	Thermoanaerobacteraceae			0.67	Environmental	Terrestrial	Soil	Wetlands
3300032770 assembled Ga0335085_10168470	3300032770	Soil microbial communities from Loxahatchee National Wildlife Refuge, Florida, United States - Lox_Sample_4.5 (*) (MER-FS) (assembled)	3	2723	0.66	7									Environmental	Terrestrial	Soil	Wetlands
3300032782 assembled Ga0335082_10109794	3300032782	Soil microbial communities from Loxahatchee National Wildlife Refuge, Florida, United States - Lox_Sample_4.1 (*) (MER-FS) (assembled)	3	2721	0.54	9	Bacteria	Nitrospirae	Nitrospira	Nitrospirales	Nitrospiraceae	Thermodesulfovibrio	Thermodesulfovibrio thiophilus	0.67	Environmental	Terrestrial	Soil	Wetlands
3300032895 assembled Ga0335074_10171660	3300032895	Soil microbial communities from Loxahatchee National Wildlife Refuge, Florida, United States - Lox_Sample_2.3 (*) (MER-FS) (assembled)	3	2701	0.62	14	Bacteria	Proteobacteria	Deltaproteobacteria					0.67	Environmental	Terrestrial	Soil	Wetlands
3300032893 assembled Ga0335069_10171235	3300032893	Soil microbial communities from Loxahatchee National Wildlife Refuge, Florida, United States - Lox_Sample_1.1 (*) (MER-FS) (assembled)	5	2672	0.64	9	Bacteria	Proteobacteria	Alphaproteobacteria					0.6	Environmental	Terrestrial	Soil	Wetlands
3300033004 assembled Ga0335084_10127384	3300033004	Soil microbial communities from Loxahatchee National Wildlife Refuge, Florida, United States - Lox_Sample_4.4 (*) (MER-FS) (assembled)	4	2648	0.65	9									Environmental	Terrestrial	Soil	Wetlands
3300032828 assembled Ga0335080_10144516	3300032828	Soil microbial communities from Loxahatchee National Wildlife Refuge, Florida, United States - Lox_Sample_3.4 (*) (MER-FS) (assembled)	5	2634	0.47	9	Bacteria	Firmicutes						0.6	Environmental	Terrestrial	Soil	Wetlands
3300032893 assembled Ga0335069_10176643	3300032893	Soil microbial communities from Loxahatchee National Wildlife Refuge, Florida, United States - Lox_Sample_1.1 (*) (MER-FS) (assembled)	3	2622	0.63	19	Bacteria	Proteobacteria	Alphaproteobacteria	Rhizobiales	Hyphomicrobiaceae	Rhodomicrobium		0.67	Environmental	Terrestrial	Soil	Wetlands
3300032897 assembled Ga0335071_10117142	3300032897	Soil microbial communities from Loxahatchee National Wildlife Refuge, Florida, United States - Lox_Sample_1.5 (*) (MER-FS) (assembled)	6	2610	0.64	10	Bacteria	Proteobacteria	Betaproteobacteria	Burkholderiales	unclassified	unclassified	Burkholderiales bacterium GJ-E10	0.5	Environmental	Terrestrial	Soil	Wetlands
3300032805 assembled Ga0335078_10226415	3300032805	Soil microbial communities from Loxahatchee National Wildlife Refuge, Florida, United States - Lox_Sample_3.2 (*) (MER-FS) (assembled)	3	2572	0.59	8	Bacteria							0.67	Environmental	Terrestrial	Soil	Wetlands
3300033004 assembled Ga0335084_10146498	3300033004	Soil microbial communities from Loxahatchee National Wildlife Refuge, Florida, United States - Lox_Sample_4.4 (*) (MER-FS) (assembled)	4	2456	0.58	11	Bacteria	Proteobacteria	Betaproteobacteria	Nitrosomonadales	Gallionellaceae	Sideroxydans	Sideroxydans lithotrophicus	0.75	Environmental	Terrestrial	Soil	Wetlands
3300032805 assembled Ga0335078_10246647	3300032805	Soil microbial communities from Loxahatchee National Wildlife Refuge, Florida, United States - Lox_Sample_3.2 (*) (MER-FS) (assembled)	4	2441	0.63	11									Environmental	Terrestrial	Soil	Wetlands
3300032895 assembled Ga0335074_10200220	3300032895	Soil microbial communities from Loxahatchee National Wildlife Refuge, Florida, United States - Lox_Sample_2.3 (*) (MER-FS) (assembled)	5	2435	0.61	14									Environmental	Terrestrial	Soil	Wetlands
3300032897 assembled Ga0335071_10133900	3300032897	Soil microbial communities from Loxahatchee National Wildlife Refuge, Florida, United States - Lox_Sample_1.5 (*) (MER-FS) (assembled)	4	2430	0.63	6	Bacteria	Proteobacteria	Deltaproteobacteria	Syntrophobacterales	Syntrophaceae	Desulfobacca	Desulfobacca acetoxidans	1	Environmental	Terrestrial	Soil	Wetlands
3300032897 assembled Ga0335071_10134239	3300032897	Soil microbial communities from Loxahatchee National Wildlife Refuge, Florida, United States - Lox_Sample_1.5 (*) (MER-FS) (assembled)	2	2426	0.63	26	Bacteria	Proteobacteria	Betaproteobacteria	Burkholderiales	Comamonadaceae	Curvibacter	Curvibacter sp. PAE-UM	1	Environmental	Terrestrial	Soil	Wetlands
3300032955 assembled Ga0335076_10134594	3300032955	Soil microbial communities from Loxahatchee National Wildlife Refuge, Florida, United States - Lox_Sample_2.5 (*) (MER-FS) (assembled)	3	2392	0.63	14	Bacteria	Firmicutes	Clostridia					0.67	Environmental	Terrestrial	Soil	Wetlands
3300033158 assembled Ga0335077_10184345	3300033158	Soil microbial communities from Loxahatchee National Wildlife Refuge, Florida, United States - Lox_Sample_3.1 (*) (MER-FS) (assembled)	5	2362	0.7	7	Bacteria	Proteobacteria	Betaproteobacteria					0.6	Environmental	Terrestrial	Soil	Wetlands
3300032829 assembled Ga0335070_10152920	3300032829	Soil microbial communities from Loxahatchee National Wildlife Refuge, Florida, United States - Lox_Sample_1.3 (*) (MER-FS) (assembled)	2	2346	0.55	11	Bacteria	Firmicutes	Clostridia					1	Environmental	Terrestrial	Soil	Wetlands
3300032897 assembled Ga0335071_10147916	3300032897	Soil microbial communities from Loxahatchee National Wildlife Refuge, Florida, United States - Lox_Sample_1.5 (*) (MER-FS) (assembled)	2	2302	0.65	12	Bacteria	Proteobacteria						1	Environmental	Terrestrial	Soil	Wetlands
3300033004 assembled Ga0335084_10170188	3300033004	Soil microbial communities from Loxahatchee National Wildlife Refuge, Florida, United States - Lox_Sample_4.4 (*) (MER-FS) (assembled)	4	2265	0.56	6	Bacteria	Proteobacteria	Deltaproteobacteria					0.75	Environmental	Terrestrial	Soil	Wetlands
3300032829 assembled Ga0335070_10162375	3300032829	Soil microbial communities from Loxahatchee National Wildlife Refuge, Florida, United States - Lox_Sample_1.3 (*) (MER-FS) (assembled)	3	2260	0.57	7	Bacteria	Caldiserica	unclassified	unclassified	unclassified	unclassified	unclassified	1	Environmental	Terrestrial	Soil	Wetlands
3300032954 assembled Ga0335083_10144768	3300032954	Soil microbial communities from Loxahatchee National Wildlife Refuge, Florida, United States - Lox_Sample_4.2 (*) (MER-FS) (assembled)	2	2255	0.63	13	Bacteria	Firmicutes	Clostridia					1	Environmental	Terrestrial	Soil	Wetlands
3300033004 assembled Ga0335084_10172812	3300033004	Soil microbial communities from Loxahatchee National Wildlife Refuge, Florida, United States - Lox_Sample_4.4 (*) (MER-FS) (assembled)	4	2247	0.65	8									Environmental	Terrestrial	Soil	Wetlands
3300032893 assembled Ga0335069_10232284	3300032893	Soil microbial communities from Loxahatchee National Wildlife Refuge, Florida, United States - Lox_Sample_1.1 (*) (MER-FS) (assembled)	2	2228	0.63	12									Environmental	Terrestrial	Soil	Wetlands
3300032893 assembled Ga0335069_10234015	3300032893	Soil microbial communities from Loxahatchee National Wildlife Refuge, Florida, United States - Lox_Sample_1.1 (*) (MER-FS) (assembled)	5	2219	0.73	10	Bacteria	Proteobacteria	Betaproteobacteria	Burkholderiales	unclassified	unclassified	Burkholderiales bacterium JOSHI_001	0.6	Environmental	Terrestrial	Soil	Wetlands
3300032892 assembled Ga0335081_10282372	3300032892	Soil microbial communities from Loxahatchee National Wildlife Refuge, Florida, United States - Lox_Sample_3.5 (*) (MER-FS) (assembled)	5	2213	0.71	10	Bacteria	Proteobacteria	Betaproteobacteria					0.6	Environmental	Terrestrial	Soil	Wetlands
3300032897 assembled Ga0335071_10159026	3300032897	Soil microbial communities from Loxahatchee National Wildlife Refuge, Florida, United States - Lox_Sample_1.5 (*) (MER-FS) (assembled)	4	2213	0.72	5									Environmental	Terrestrial	Soil	Wetlands
3300032783 assembled Ga0335079_10204369	3300032783	Soil microbial communities from Loxahatchee National Wildlife Refuge, Florida, United States - Lox_Sample_3.3 (*) (MER-FS) (assembled)	3	2190	0.67	13	Bacteria	Proteobacteria	Betaproteobacteria	Burkholderiales				0.67	Environmental	Terrestrial	Soil	Wetlands
3300032898 assembled Ga0335072_10228128	3300032898	Soil microbial communities from Loxahatchee National Wildlife Refuge, Florida, United States - Lox_Sample_2.1 (*) (MER-FS) (assembled)	4	2169	0.62	10	Bacteria							1	Environmental	Terrestrial	Soil	Wetlands
3300033004 assembled Ga0335084_10185184	3300033004	Soil microbial communities from Loxahatchee National Wildlife Refuge, Florida, United States - Lox_Sample_4.4 (*) (MER-FS) (assembled)	5	2163	0.72	10	Bacteria	Proteobacteria	Betaproteobacteria	Burkholderiales	unclassified	unclassified	Burkholderiales bacterium JOSHI_001	0.6	Environmental	Terrestrial	Soil	Wetlands
3300032829 assembled Ga0335070_10176497	3300032829	Soil microbial communities from Loxahatchee National Wildlife Refuge, Florida, United States - Lox_Sample_1.3 (*) (MER-FS) (assembled)	2	2148	0.52	7	Bacteria	Nitrospirae	Nitrospira	Nitrospirales	Nitrospiraceae	Thermodesulfovibrio	Thermodesulfovibrio thiophilus	1	Environmental	Terrestrial	Soil	Wetlands
3300032893 assembled Ga0335069_10247148	3300032893	Soil microbial communities from Loxahatchee National Wildlife Refuge, Florida, United States - Lox_Sample_1.1 (*) (MER-FS) (assembled)	2	2148	0.5	6	Bacteria	Proteobacteria	Deltaproteobacteria	Syntrophobacterales	Syntrophaceae	Desulfomonile	Desulfomonile tiedjei	1	Environmental	Terrestrial	Soil	Wetlands
3300032829 assembled Ga0335070_10179432	3300032829	Soil microbial communities from Loxahatchee National Wildlife Refuge, Florida, United States - Lox_Sample_1.3 (*) (MER-FS) (assembled)	3	2127	0.68	5	Bacteria							0.67	Environmental	Terrestrial	Soil	Wetlands
3300032770 assembled Ga0335085_10252438	3300032770	Soil microbial communities from Loxahatchee National Wildlife Refuge, Florida, United States - Lox_Sample_4.5 (*) (MER-FS) (assembled)	4	2119	0.67	13									Environmental	Terrestrial	Soil	Wetlands
3300032893 assembled Ga0335069_10255621	3300032893	Soil microbial communities from Loxahatchee National Wildlife Refuge, Florida, United States - Lox_Sample_1.1 (*) (MER-FS) (assembled)	2	2104	0.65	30									Environmental	Terrestrial	Soil	Wetlands
3300033158 assembled Ga0335077_10226246	3300033158	Soil microbial communities from Loxahatchee National Wildlife Refuge, Florida, United States - Lox_Sample_3.1 (*) (MER-FS) (assembled)	4	2086	0.59	8	Bacteria							0.75	Environmental	Terrestrial	Soil	Wetlands
3300032828 assembled Ga0335080_10219681	3300032828	Soil microbial communities from Loxahatchee National Wildlife Refuge, Florida, United States - Lox_Sample_3.4 (*) (MER-FS) (assembled)	4	2085	0.64	8	Bacteria							0.75	Environmental	Terrestrial	Soil	Wetlands
3300032829 assembled Ga0335070_10186987	3300032829	Soil microbial communities from Loxahatchee National Wildlife Refuge, Florida, United States - Lox_Sample_1.3 (*) (MER-FS) (assembled)	3	2073	0.64	8	Bacteria	Firmicutes	Clostridia					0.67	Environmental	Terrestrial	Soil	Wetlands
3300033004 assembled Ga0335084_10201054	3300033004	Soil microbial communities from Loxahatchee National Wildlife Refuge, Florida, United States - Lox_Sample_4.4 (*) (MER-FS) (assembled)	2	2069	0.61	8	Bacteria	Proteobacteria	Deltaproteobacteria	Syntrophobacterales	Syntrophaceae	Desulfobacca	Desulfobacca acetoxidans	1	Environmental	Terrestrial	Soil	Wetlands
3300033004 assembled Ga0335084_10201575	3300033004	Soil microbial communities from Loxahatchee National Wildlife Refuge, Florida, United States - Lox_Sample_4.4 (*) (MER-FS) (assembled)	3	2066	0.54	5									Environmental	Terrestrial	Soil	Wetlands
3300032770 assembled Ga0335085_10267802	3300032770	Soil microbial communities from Loxahatchee National Wildlife Refuge, Florida, United States - Lox_Sample_4.5 (*) (MER-FS) (assembled)	2	2043	0.57	12	Bacteria	Firmicutes	Clostridia					1	Environmental	Terrestrial	Soil	Wetlands
3300033158 assembled Ga0335077_10236000	3300033158	Soil microbial communities from Loxahatchee National Wildlife Refuge, Florida, United States - Lox_Sample_3.1 (*) (MER-FS) (assembled)	4	2035	0.65	7									Environmental	Terrestrial	Soil	Wetlands
3300032770 assembled Ga0335085_10272544	3300032770	Soil microbial communities from Loxahatchee National Wildlife Refuge, Florida, United States - Lox_Sample_4.5 (*) (MER-FS) (assembled)	3	2022	0.59	9	Bacteria	Firmicutes	Clostridia					0.67	Environmental	Terrestrial	Soil	Wetlands
3300032892 assembled Ga0335081_10325733	3300032892	Soil microbial communities from Loxahatchee National Wildlife Refuge, Florida, United States - Lox_Sample_3.5 (*) (MER-FS) (assembled)	2	2018	0.63	20									Environmental	Terrestrial	Soil	Wetlands
3300032897 assembled Ga0335071_10188479	3300032897	Soil microbial communities from Loxahatchee National Wildlife Refuge, Florida, United States - Lox_Sample_1.5 (*) (MER-FS) (assembled)	3	2016	0.54	11	Bacteria	Caldiserica	unclassified	unclassified	unclassified	unclassified	unclassified	1	Environmental	Terrestrial	Soil	Wetlands
3300032897 assembled Ga0335071_10189120	3300032897	Soil microbial communities from Loxahatchee National Wildlife Refuge, Florida, United States - Lox_Sample_1.5 (*) (MER-FS) (assembled)	3	2012	0.65	15	Bacteria							0.67	Environmental	Terrestrial	Soil	Wetlands
3300032782 assembled Ga0335082_10183006	3300032782	Soil microbial communities from Loxahatchee National Wildlife Refuge, Florida, United States - Lox_Sample_4.1 (*) (MER-FS) (assembled)	2	2003	0.6	6									Environmental	Terrestrial	Soil	Wetlands
3300032783 assembled Ga0335079_10242113	3300032783	Soil microbial communities from Loxahatchee National Wildlife Refuge, Florida, United States - Lox_Sample_3.3 (*) (MER-FS) (assembled)	2	1987	0.58	11									Environmental	Terrestrial	Soil	Wetlands
3300032897 assembled Ga0335071_10194728	3300032897	Soil microbial communities from Loxahatchee National Wildlife Refuge, Florida, United States - Lox_Sample_1.5 (*) (MER-FS) (assembled)	2	1980	0.7	10									Environmental	Terrestrial	Soil	Wetlands
3300032805 assembled Ga0335078_10347913	3300032805	Soil microbial communities from Loxahatchee National Wildlife Refuge, Florida, United States - Lox_Sample_3.2 (*) (MER-FS) (assembled)	2	1970	0.63	8	Bacteria							1	Environmental	Terrestrial	Soil	Wetlands
3300032893 assembled Ga0335069_10285596	3300032893	Soil microbial communities from Loxahatchee National Wildlife Refuge, Florida, United States - Lox_Sample_1.1 (*) (MER-FS) (assembled)	4	1969	0.66	11	Bacteria	Proteobacteria	Alphaproteobacteria	Rhizobiales	Hyphomicrobiaceae	Rhodomicrobium		0.75	Environmental	Terrestrial	Soil	Wetlands
3300032770 assembled Ga0335085_10286661	3300032770	Soil microbial communities from Loxahatchee National Wildlife Refuge, Florida, United States - Lox_Sample_4.5 (*) (MER-FS) (assembled)	3	1959	0.63	18	Bacteria							1	Environmental	Terrestrial	Soil	Wetlands
3300032782 assembled Ga0335082_10190672	3300032782	Soil microbial communities from Loxahatchee National Wildlife Refuge, Florida, United States - Lox_Sample_4.1 (*) (MER-FS) (assembled)	4	1954	0.63	11									Environmental	Terrestrial	Soil	Wetlands
3300033004 assembled Ga0335084_10223403	3300033004	Soil microbial communities from Loxahatchee National Wildlife Refuge, Florida, United States - Lox_Sample_4.4 (*) (MER-FS) (assembled)	2	1954	0.69	16									Environmental	Terrestrial	Soil	Wetlands
3300032897 assembled Ga0335071_10200634	3300032897	Soil microbial communities from Loxahatchee National Wildlife Refuge, Florida, United States - Lox_Sample_1.5 (*) (MER-FS) (assembled)	2	1948	0.62	23	Bacteria	Proteobacteria	Alphaproteobacteria	Rhizobiales	Hyphomicrobiaceae	Rhodomicrobium		1	Environmental	Terrestrial	Soil	Wetlands
3300032770 assembled Ga0335085_10290976	3300032770	Soil microbial communities from Loxahatchee National Wildlife Refuge, Florida, United States - Lox_Sample_4.5 (*) (MER-FS) (assembled)	3	1941	0.67	7	Bacteria	Proteobacteria	Betaproteobacteria	Burkholderiales	Comamonadaceae	Curvibacter	Curvibacter sp. PAE-UM	0.67	Environmental	Terrestrial	Soil	Wetlands
3300032893 assembled Ga0335069_10292751	3300032893	Soil microbial communities from Loxahatchee National Wildlife Refuge, Florida, United States - Lox_Sample_1.1 (*) (MER-FS) (assembled)	3	1940	0.53	10	Bacteria	Proteobacteria	Deltaproteobacteria	Syntrophobacterales	Syntrophaceae	Desulfomonile	Desulfomonile tiedjei	1	Environmental	Terrestrial	Soil	Wetlands
3300033004 assembled Ga0335084_10226856	3300033004	Soil microbial communities from Loxahatchee National Wildlife Refuge, Florida, United States - Lox_Sample_4.4 (*) (MER-FS) (assembled)	4	1938	0.66	7	Bacteria	Proteobacteria	Betaproteobacteria					0.75	Environmental	Terrestrial	Soil	Wetlands
3300032897 assembled Ga0335071_10204405	3300032897	Soil microbial communities from Loxahatchee National Wildlife Refuge, Florida, United States - Lox_Sample_1.5 (*) (MER-FS) (assembled)	2	1929	0.64	14	Bacteria	Proteobacteria	Deltaproteobacteria					1	Environmental	Terrestrial	Soil	Wetlands
3300033004 assembled Ga0335084_10229322	3300033004	Soil microbial communities from Loxahatchee National Wildlife Refuge, Florida, United States - Lox_Sample_4.4 (*) (MER-FS) (assembled)	3	1926	0.71	11									Environmental	Terrestrial	Soil	Wetlands
3300032782 assembled Ga0335082_10197225	3300032782	Soil microbial communities from Loxahatchee National Wildlife Refuge, Florida, United States - Lox_Sample_4.1 (*) (MER-FS) (assembled)	4	1914	0.69	8	Bacteria	Proteobacteria						0.75	Environmental	Terrestrial	Soil	Wetlands
3300033004 assembled Ga0335084_10233555	3300033004	Soil microbial communities from Loxahatchee National Wildlife Refuge, Florida, United States - Lox_Sample_4.4 (*) (MER-FS) (assembled)	3	1908	0.68	9	Bacteria	Proteobacteria	Betaproteobacteria	Burkholderiales				0.67	Environmental	Terrestrial	Soil	Wetlands
3300032897 assembled Ga0335071_10211372	3300032897	Soil microbial communities from Loxahatchee National Wildlife Refuge, Florida, United States - Lox_Sample_1.5 (*) (MER-FS) (assembled)	3	1894	0.49	7									Environmental	Terrestrial	Soil	Wetlands
3300032770 assembled Ga0335085_10304639	3300032770	Soil microbial communities from Loxahatchee National Wildlife Refuge, Florida, United States - Lox_Sample_4.5 (*) (MER-FS) (assembled)	2	1887	0.64	6									Environmental	Terrestrial	Soil	Wetlands
3300032770 assembled Ga0335085_10314910	3300032770	Soil microbial communities from Loxahatchee National Wildlife Refuge, Florida, United States - Lox_Sample_4.5 (*) (MER-FS) (assembled)	2	1848	0.57	21									Environmental	Terrestrial	Soil	Wetlands
3300032829 assembled Ga0335070_10227931	3300032829	Soil microbial communities from Loxahatchee National Wildlife Refuge, Florida, United States - Lox_Sample_1.3 (*) (MER-FS) (assembled)	2	1839	0.66	10	Bacteria	Firmicutes	Clostridia					1	Environmental	Terrestrial	Soil	Wetlands
3300032829 assembled Ga0335070_10229198	3300032829	Soil microbial communities from Loxahatchee National Wildlife Refuge, Florida, United States - Lox_Sample_1.3 (*) (MER-FS) (assembled)	3	1833	0.64	19	Bacteria	Proteobacteria	Alphaproteobacteria					0.67	Environmental	Terrestrial	Soil	Wetlands
3300032782 assembled Ga0335082_10212409	3300032782	Soil microbial communities from Loxahatchee National Wildlife Refuge, Florida, United States - Lox_Sample_4.1 (*) (MER-FS) (assembled)	2	1831	0.64	7	Bacteria	Proteobacteria	Betaproteobacteria	Burkholderiales				1	Environmental	Terrestrial	Soil	Wetlands
3300032897 assembled Ga0335071_10225556	3300032897	Soil microbial communities from Loxahatchee National Wildlife Refuge, Florida, United States - Lox_Sample_1.5 (*) (MER-FS) (assembled)	2	1827	0.64	10									Environmental	Terrestrial	Soil	Wetlands
3300032770 assembled Ga0335085_10321116	3300032770	Soil microbial communities from Loxahatchee National Wildlife Refuge, Florida, United States - Lox_Sample_4.5 (*) (MER-FS) (assembled)	3	1826	0.69	6									Environmental	Terrestrial	Soil	Wetlands
3300032897 assembled Ga0335071_10225989	3300032897	Soil microbial communities from Loxahatchee National Wildlife Refuge, Florida, United States - Lox_Sample_1.5 (*) (MER-FS) (assembled)	3	1825	0.56	9	Bacteria							0.67	Environmental	Terrestrial	Soil	Wetlands
3300033158 assembled Ga0335077_10289309	3300033158	Soil microbial communities from Loxahatchee National Wildlife Refuge, Florida, United States - Lox_Sample_3.1 (*) (MER-FS) (assembled)	2	1798	0.66	14									Environmental	Terrestrial	Soil	Wetlands
3300032895 assembled Ga0335074_10309640	3300032895	Soil microbial communities from Loxahatchee National Wildlife Refuge, Florida, United States - Lox_Sample_2.3 (*) (MER-FS) (assembled)	3	1796	0.58	6									Environmental	Terrestrial	Soil	Wetlands
3300032829 assembled Ga0335070_10237497	3300032829	Soil microbial communities from Loxahatchee National Wildlife Refuge, Florida, United States - Lox_Sample_1.3 (*) (MER-FS) (assembled)	2	1794	0.67	13	Bacteria	Proteobacteria	Betaproteobacteria	Burkholderiales	unclassified	unclassified		1	Environmental	Terrestrial	Soil	Wetlands
3300032897 assembled Ga0335071_10234412	3300032897	Soil microbial communities from Loxahatchee National Wildlife Refuge, Florida, United States - Lox_Sample_1.5 (*) (MER-FS) (assembled)	3	1789	0.59	7	Bacteria	Firmicutes	Clostridia					0.67	Environmental	Terrestrial	Soil	Wetlands
3300032783 assembled Ga0335079_10290098	3300032783	Soil microbial communities from Loxahatchee National Wildlife Refuge, Florida, United States - Lox_Sample_3.3 (*) (MER-FS) (assembled)	2	1788	0.57	6	Bacteria	Firmicutes	Clostridia					1	Environmental	Terrestrial	Soil	Wetlands
3300032829 assembled Ga0335070_10241772	3300032829	Soil microbial communities from Loxahatchee National Wildlife Refuge, Florida, United States - Lox_Sample_1.3 (*) (MER-FS) (assembled)	2	1774	0.61	12	Bacteria							1	Environmental	Terrestrial	Soil	Wetlands
3300032893 assembled Ga0335069_10345467	3300032893	Soil microbial communities from Loxahatchee National Wildlife Refuge, Florida, United States - Lox_Sample_1.1 (*) (MER-FS) (assembled)	2	1759	0.56	8	Bacteria	Firmicutes	Clostridia					1	Environmental	Terrestrial	Soil	Wetlands
3300033004 assembled Ga0335084_10270937	3300033004	Soil microbial communities from Loxahatchee National Wildlife Refuge, Florida, United States - Lox_Sample_4.4 (*) (MER-FS) (assembled)	3	1757	0.52	9									Environmental	Terrestrial	Soil	Wetlands
3300032783 assembled Ga0335079_10299763	3300032783	Soil microbial communities from Loxahatchee National Wildlife Refuge, Florida, United States - Lox_Sample_3.3 (*) (MER-FS) (assembled)	5	1755	0.67	5									Environmental	Terrestrial	Soil	Wetlands
3300032805 assembled Ga0335078_10417450	3300032805	Soil microbial communities from Loxahatchee National Wildlife Refuge, Florida, United States - Lox_Sample_3.2 (*) (MER-FS) (assembled)	2	1754	0.62	13									Environmental	Terrestrial	Soil	Wetlands
3300032895 assembled Ga0335074_10320106	3300032895	Soil microbial communities from Loxahatchee National Wildlife Refuge, Florida, United States - Lox_Sample_2.3 (*) (MER-FS) (assembled)	2	1754	0.6	10									Environmental	Terrestrial	Soil	Wetlands
3300032955 assembled Ga0335076_10233442	3300032955	Soil microbial communities from Loxahatchee National Wildlife Refuge, Florida, United States - Lox_Sample_2.5 (*) (MER-FS) (assembled)	2	1736	0.67	8	Bacteria							1	Environmental	Terrestrial	Soil	Wetlands
3300032829 assembled Ga0335070_10250679	3300032829	Soil microbial communities from Loxahatchee National Wildlife Refuge, Florida, United States - Lox_Sample_1.3 (*) (MER-FS) (assembled)	3	1735	0.62	19	Bacteria	Proteobacteria	Alphaproteobacteria	Rhizobiales	Hyphomicrobiaceae	Rhodomicrobium		0.67	Environmental	Terrestrial	Soil	Wetlands
3300033004 assembled Ga0335084_10278880	3300033004	Soil microbial communities from Loxahatchee National Wildlife Refuge, Florida, United States - Lox_Sample_4.4 (*) (MER-FS) (assembled)	2	1729	0.58	10									Environmental	Terrestrial	Soil	Wetlands
3300032783 assembled Ga0335079_10307647	3300032783	Soil microbial communities from Loxahatchee National Wildlife Refuge, Florida, United States - Lox_Sample_3.3 (*) (MER-FS) (assembled)	3	1728	0.47	7	Bacteria	Nitrospirae	Nitrospira	Nitrospirales	Nitrospiraceae			0.67	Environmental	Terrestrial	Soil	Wetlands
3300032805 assembled Ga0335078_10429016	3300032805	Soil microbial communities from Loxahatchee National Wildlife Refuge, Florida, United States - Lox_Sample_3.2 (*) (MER-FS) (assembled)	2	1724	0.6	10									Environmental	Terrestrial	Soil	Wetlands
3300032782 assembled Ga0335082_10235963	3300032782	Soil microbial communities from Loxahatchee National Wildlife Refuge, Florida, United States - Lox_Sample_4.1 (*) (MER-FS) (assembled)	2	1716	0.55	10									Environmental	Terrestrial	Soil	Wetlands
3300032893 assembled Ga0335069_10363003	3300032893	Soil microbial communities from Loxahatchee National Wildlife Refuge, Florida, United States - Lox_Sample_1.1 (*) (MER-FS) (assembled)	2	1708	0.53	6	Bacteria	Caldiserica	unclassified	unclassified	unclassified	unclassified	unclassified	1	Environmental	Terrestrial	Soil	Wetlands
3300032893 assembled Ga0335069_10363044	3300032893	Soil microbial communities from Loxahatchee National Wildlife Refuge, Florida, United States - Lox_Sample_1.1 (*) (MER-FS) (assembled)	2	1708	0.59	7	Bacteria	Firmicutes	Clostridia					1	Environmental	Terrestrial	Soil	Wetlands
3300033004 assembled Ga0335084_10285128	3300033004	Soil microbial communities from Loxahatchee National Wildlife Refuge, Florida, United States - Lox_Sample_4.4 (*) (MER-FS) (assembled)	2	1708	0.71	7	Bacteria							1	Environmental	Terrestrial	Soil	Wetlands
3300032892 assembled Ga0335081_10422066	3300032892	Soil microbial communities from Loxahatchee National Wildlife Refuge, Florida, United States - Lox_Sample_3.5 (*) (MER-FS) (assembled)	3	1707	0.58	12	Bacteria	Firmicutes	Clostridia	Clostridiales	Peptococcaceae			0.67	Environmental	Terrestrial	Soil	Wetlands
3300032829 assembled Ga0335070_10258260	3300032829	Soil microbial communities from Loxahatchee National Wildlife Refuge, Florida, United States - Lox_Sample_1.3 (*) (MER-FS) (assembled)	2	1704	0.65	10	Bacteria	Proteobacteria	Gammaproteobacteria	Acidiferrobacterales	Acidiferrobacteraceae			1	Environmental	Terrestrial	Soil	Wetlands
3300032770 assembled Ga0335085_10364239	3300032770	Soil microbial communities from Loxahatchee National Wildlife Refuge, Florida, United States - Lox_Sample_4.5 (*) (MER-FS) (assembled)	2	1690	0.67	7									Environmental	Terrestrial	Soil	Wetlands
3300032892 assembled Ga0335081_10430340	3300032892	Soil microbial communities from Loxahatchee National Wildlife Refuge, Florida, United States - Lox_Sample_3.5 (*) (MER-FS) (assembled)	2	1686	0.65	10	Bacteria	Proteobacteria	Betaproteobacteria					1	Environmental	Terrestrial	Soil	Wetlands
3300032892 assembled Ga0335081_10431912	3300032892	Soil microbial communities from Loxahatchee National Wildlife Refuge, Florida, United States - Lox_Sample_3.5 (*) (MER-FS) (assembled)	2	1682	0.58	7	Bacteria	Firmicutes	Clostridia					1	Environmental	Terrestrial	Soil	Wetlands
3300032893 assembled Ga0335069_10372690	3300032893	Soil microbial communities from Loxahatchee National Wildlife Refuge, Florida, United States - Lox_Sample_1.1 (*) (MER-FS) (assembled)	3	1681	0.61	13	Bacteria	Proteobacteria	Deltaproteobacteria					0.67	Environmental	Terrestrial	Soil	Wetlands
3300032893 assembled Ga0335069_10375841	3300032893	Soil microbial communities from Loxahatchee National Wildlife Refuge, Florida, United States - Lox_Sample_1.1 (*) (MER-FS) (assembled)	2	1673	0.6	6	Bacteria							1	Environmental	Terrestrial	Soil	Wetlands
3300032770 assembled Ga0335085_10370521	3300032770	Soil microbial communities from Loxahatchee National Wildlife Refuge, Florida, United States - Lox_Sample_4.5 (*) (MER-FS) (assembled)	3	1672	0.57	5	Bacteria	Proteobacteria	Betaproteobacteria	Nitrosomonadales	Gallionellaceae	Sideroxydans	Sideroxydans lithotrophicus	0.67	Environmental	Terrestrial	Soil	Wetlands
3300032893 assembled Ga0335069_10376600	3300032893	Soil microbial communities from Loxahatchee National Wildlife Refuge, Florida, United States - Lox_Sample_1.1 (*) (MER-FS) (assembled)	4	1671	0.61	5									Environmental	Terrestrial	Soil	Wetlands
3300032829 assembled Ga0335070_10269071	3300032829	Soil microbial communities from Loxahatchee National Wildlife Refuge, Florida, United States - Lox_Sample_1.3 (*) (MER-FS) (assembled)	2	1663	0.64	14	Bacteria	Proteobacteria	Alphaproteobacteria					1	Environmental	Terrestrial	Soil	Wetlands
3300032783 assembled Ga0335079_10330992	3300032783	Soil microbial communities from Loxahatchee National Wildlife Refuge, Florida, United States - Lox_Sample_3.3 (*) (MER-FS) (assembled)	2	1656	0.61	11	Bacteria	Firmicutes	Clostridia	Clostridiales				1	Environmental	Terrestrial	Soil	Wetlands
3300032897 assembled Ga0335071_10270964	3300032897	Soil microbial communities from Loxahatchee National Wildlife Refuge, Florida, United States - Lox_Sample_1.5 (*) (MER-FS) (assembled)	2	1651	0.63	6									Environmental	Terrestrial	Soil	Wetlands
3300032892 assembled Ga0335081_10445038	3300032892	Soil microbial communities from Loxahatchee National Wildlife Refuge, Florida, United States - Lox_Sample_3.5 (*) (MER-FS) (assembled)	2	1650	0.6	11									Environmental	Terrestrial	Soil	Wetlands
3300032893 assembled Ga0335069_10386090	3300032893	Soil microbial communities from Loxahatchee National Wildlife Refuge, Florida, United States - Lox_Sample_1.1 (*) (MER-FS) (assembled)	2	1646	0.6	9	Bacteria	Firmicutes	Clostridia					1	Environmental	Terrestrial	Soil	Wetlands
3300033158 assembled Ga0335077_10336249	3300033158	Soil microbial communities from Loxahatchee National Wildlife Refuge, Florida, United States - Lox_Sample_3.1 (*) (MER-FS) (assembled)	2	1641	0.63	6									Environmental	Terrestrial	Soil	Wetlands
3300032954 assembled Ga0335083_10240929	3300032954	Soil microbial communities from Loxahatchee National Wildlife Refuge, Florida, United States - Lox_Sample_4.2 (*) (MER-FS) (assembled)	2	1624	0.67	7	Bacteria	Firmicutes	Clostridia					1	Environmental	Terrestrial	Soil	Wetlands
3300032783 assembled Ga0335079_10345063	3300032783	Soil microbial communities from Loxahatchee National Wildlife Refuge, Florida, United States - Lox_Sample_3.3 (*) (MER-FS) (assembled)	2	1616	0.56	6	Bacteria	Firmicutes	Clostridia	Thermoanaerobacterales	Thermoanaerobacteraceae			1	Environmental	Terrestrial	Soil	Wetlands
3300032770 assembled Ga0335085_10394244	3300032770	Soil microbial communities from Loxahatchee National Wildlife Refuge, Florida, United States - Lox_Sample_4.5 (*) (MER-FS) (assembled)	2	1609	0.66	6	Bacteria	Proteobacteria	Betaproteobacteria	Burkholderiales				1	Environmental	Terrestrial	Soil	Wetlands
3300032893 assembled Ga0335069_10401715	3300032893	Soil microbial communities from Loxahatchee National Wildlife Refuge, Florida, United States - Lox_Sample_1.1 (*) (MER-FS) (assembled)	2	1608	0.56	12	Bacteria	Firmicutes	Clostridia					1	Environmental	Terrestrial	Soil	Wetlands
3300032805 assembled Ga0335078_10481350	3300032805	Soil microbial communities from Loxahatchee National Wildlife Refuge, Florida, United States - Lox_Sample_3.2 (*) (MER-FS) (assembled)	2	1601	0.61	8									Environmental	Terrestrial	Soil	Wetlands
3300032893 assembled Ga0335069_10406981	3300032893	Soil microbial communities from Loxahatchee National Wildlife Refuge, Florida, United States - Lox_Sample_1.1 (*) (MER-FS) (assembled)	2	1595	0.6	7									Environmental	Terrestrial	Soil	Wetlands
3300032892 assembled Ga0335081_10474081	3300032892	Soil microbial communities from Loxahatchee National Wildlife Refuge, Florida, United States - Lox_Sample_3.5 (*) (MER-FS) (assembled)	2	1584	0.62	14	Bacteria							1	Environmental	Terrestrial	Soil	Wetlands
3300032897 assembled Ga0335071_10293699	3300032897	Soil microbial communities from Loxahatchee National Wildlife Refuge, Florida, United States - Lox_Sample_1.5 (*) (MER-FS) (assembled)	2	1579	0.42	6									Environmental	Terrestrial	Soil	Wetlands
3300032892 assembled Ga0335081_10483809	3300032892	Soil microbial communities from Loxahatchee National Wildlife Refuge, Florida, United States - Lox_Sample_3.5 (*) (MER-FS) (assembled)	2	1563	0.58	8									Environmental	Terrestrial	Soil	Wetlands
3300032893 assembled Ga0335069_10423231	3300032893	Soil microbial communities from Loxahatchee National Wildlife Refuge, Florida, United States - Lox_Sample_1.1 (*) (MER-FS) (assembled)	3	1558	0.62	12	Bacteria	Proteobacteria	Alphaproteobacteria	Rhodobacterales	Rhodobacteraceae	Maritimibacter	Maritimibacter sp. HL-12	0.67	Environmental	Terrestrial	Soil	Wetlands
3300032828 assembled Ga0335080_10365047	3300032828	Soil microbial communities from Loxahatchee National Wildlife Refuge, Florida, United States - Lox_Sample_3.4 (*) (MER-FS) (assembled)	2	1555	0.7	10	Bacteria							1	Environmental	Terrestrial	Soil	Wetlands
3300032829 assembled Ga0335070_10303078	3300032829	Soil microbial communities from Loxahatchee National Wildlife Refuge, Florida, United States - Lox_Sample_1.3 (*) (MER-FS) (assembled)	2	1548	0.52	6	Bacteria	Caldiserica	unclassified	unclassified	unclassified	unclassified	unclassified	1	Environmental	Terrestrial	Soil	Wetlands
3300032892 assembled Ga0335081_10496087	3300032892	Soil microbial communities from Loxahatchee National Wildlife Refuge, Florida, United States - Lox_Sample_3.5 (*) (MER-FS) (assembled)	2	1538	0.62	8									Environmental	Terrestrial	Soil	Wetlands
3300032783 assembled Ga0335079_10375865	3300032783	Soil microbial communities from Loxahatchee National Wildlife Refuge, Florida, United States - Lox_Sample_3.3 (*) (MER-FS) (assembled)	2	1537	0.52	8									Environmental	Terrestrial	Soil	Wetlands
3300033004 assembled Ga0335084_10353890	3300033004	Soil microbial communities from Loxahatchee National Wildlife Refuge, Florida, United States - Lox_Sample_4.4 (*) (MER-FS) (assembled)	2	1515	0.66	49	Bacteria	Proteobacteria	Betaproteobacteria	Burkholderiales	Comamonadaceae	Curvibacter	Curvibacter sp. PAE-UM	1	Environmental	Terrestrial	Soil	Wetlands
3300032805 assembled Ga0335078_10540215	3300032805	Soil microbial communities from Loxahatchee National Wildlife Refuge, Florida, United States - Lox_Sample_3.2 (*) (MER-FS) (assembled)	2	1487	0.63	9	Bacteria	Firmicutes	Clostridia					1	Environmental	Terrestrial	Soil	Wetlands
3300032892 assembled Ga0335081_10524986	3300032892	Soil microbial communities from Loxahatchee National Wildlife Refuge, Florida, United States - Lox_Sample_3.5 (*) (MER-FS) (assembled)	3	1482	0.56	11	Bacteria	Firmicutes	Clostridia					0.67	Environmental	Terrestrial	Soil	Wetlands
3300032892 assembled Ga0335081_10527866	3300032892	Soil microbial communities from Loxahatchee National Wildlife Refuge, Florida, United States - Lox_Sample_3.5 (*) (MER-FS) (assembled)	2	1477	0.56	16	Bacteria	Proteobacteria	Deltaproteobacteria	Syntrophobacterales	Syntrophobacteraceae	Syntrophobacter	Syntrophobacter fumaroxidans	1	Environmental	Terrestrial	Soil	Wetlands
3300032897 assembled Ga0335071_10332613	3300032897	Soil microbial communities from Loxahatchee National Wildlife Refuge, Florida, United States - Lox_Sample_1.5 (*) (MER-FS) (assembled)	2	1472	0.66	11									Environmental	Terrestrial	Soil	Wetlands
3300032829 assembled Ga0335070_10330950	3300032829	Soil microbial communities from Loxahatchee National Wildlife Refuge, Florida, United States - Lox_Sample_1.3 (*) (MER-FS) (assembled)	2	1470	0.59	7	Bacteria	Proteobacteria	Deltaproteobacteria	Syntrophobacterales	Syntrophaceae	Desulfobacca	Desulfobacca acetoxidans	1	Environmental	Terrestrial	Soil	Wetlands
3300032782 assembled Ga0335082_10316607	3300032782	Soil microbial communities from Loxahatchee National Wildlife Refuge, Florida, United States - Lox_Sample_4.1 (*) (MER-FS) (assembled)	3	1432	0.62	9	Bacteria	Firmicutes	Clostridia					0.67	Environmental	Terrestrial	Soil	Wetlands
3300032897 assembled Ga0335071_10363896	3300032897	Soil microbial communities from Loxahatchee National Wildlife Refuge, Florida, United States - Lox_Sample_1.5 (*) (MER-FS) (assembled)	2	1400	0.64	7									Environmental	Terrestrial	Soil	Wetlands
3300032897 assembled Ga0335071_10364516	3300032897	Soil microbial communities from Loxahatchee National Wildlife Refuge, Florida, United States - Lox_Sample_1.5 (*) (MER-FS) (assembled)	2	1399	0.64	13	Bacteria	Proteobacteria	Betaproteobacteria					1	Environmental	Terrestrial	Soil	Wetlands
3300032955 assembled Ga0335076_10337282	3300032955	Soil microbial communities from Loxahatchee National Wildlife Refuge, Florida, United States - Lox_Sample_2.5 (*) (MER-FS) (assembled)	2	1394	0.71	6	Bacteria							1	Environmental	Terrestrial	Soil	Wetlands
3300032893 assembled Ga0335069_10515086	3300032893	Soil microbial communities from Loxahatchee National Wildlife Refuge, Florida, United States - Lox_Sample_1.1 (*) (MER-FS) (assembled)	4	1385	0.53	5									Environmental	Terrestrial	Soil	Wetlands
3300032895 assembled Ga0335074_10445117	3300032895	Soil microbial communities from Loxahatchee National Wildlife Refuge, Florida, United States - Lox_Sample_2.3 (*) (MER-FS) (assembled)	2	1377	0.64	4	Bacteria							1	Environmental	Terrestrial	Soil	Wetlands
3300033158 assembled Ga0335077_10449991	3300033158	Soil microbial communities from Loxahatchee National Wildlife Refuge, Florida, United States - Lox_Sample_3.1 (*) (MER-FS) (assembled)	3	1372	0.59	10	Bacteria							1	Environmental	Terrestrial	Soil	Wetlands
3300032828 assembled Ga0335080_10452610	3300032828	Soil microbial communities from Loxahatchee National Wildlife Refuge, Florida, United States - Lox_Sample_3.4 (*) (MER-FS) (assembled)	2	1370	0.63	18	Bacteria	Firmicutes	Clostridia	Clostridiales				1	Environmental	Terrestrial	Soil	Wetlands
3300032829 assembled Ga0335070_10373467	3300032829	Soil microbial communities from Loxahatchee National Wildlife Refuge, Florida, United States - Lox_Sample_1.3 (*) (MER-FS) (assembled)	2	1369	0.6	15	Bacteria	Proteobacteria	Deltaproteobacteria	Syntrophobacterales	Syntrophaceae	Desulfobacca	Desulfobacca acetoxidans	1	Environmental	Terrestrial	Soil	Wetlands
3300032770 assembled Ga0335085_10511723	3300032770	Soil microbial communities from Loxahatchee National Wildlife Refuge, Florida, United States - Lox_Sample_4.5 (*) (MER-FS) (assembled)	2	1368	0.6	6									Environmental	Terrestrial	Soil	Wetlands
3300032770 assembled Ga0335085_10514207	3300032770	Soil microbial communities from Loxahatchee National Wildlife Refuge, Florida, United States - Lox_Sample_4.5 (*) (MER-FS) (assembled)	2	1364	0.62	8	Bacteria							1	Environmental	Terrestrial	Soil	Wetlands
3300032829 assembled Ga0335070_10376709	3300032829	Soil microbial communities from Loxahatchee National Wildlife Refuge, Florida, United States - Lox_Sample_1.3 (*) (MER-FS) (assembled)	2	1362	0.65	7	Bacteria							1	Environmental	Terrestrial	Soil	Wetlands
3300032893 assembled Ga0335069_10532805	3300032893	Soil microbial communities from Loxahatchee National Wildlife Refuge, Florida, United States - Lox_Sample_1.1 (*) (MER-FS) (assembled)	2	1357	0.51	9	Bacteria	Nitrospirae	Nitrospira	Nitrospirales	Nitrospiraceae	Thermodesulfovibrio		1	Environmental	Terrestrial	Soil	Wetlands
3300032770 assembled Ga0335085_10522646	3300032770	Soil microbial communities from Loxahatchee National Wildlife Refuge, Florida, United States - Lox_Sample_4.5 (*) (MER-FS) (assembled)	2	1350	0.51	9									Environmental	Terrestrial	Soil	Wetlands
3300032893 assembled Ga0335069_10542072	3300032893	Soil microbial communities from Loxahatchee National Wildlife Refuge, Florida, United States - Lox_Sample_1.1 (*) (MER-FS) (assembled)	2	1343	0.67	8									Environmental	Terrestrial	Soil	Wetlands
3300032783 assembled Ga0335079_10473024	3300032783	Soil microbial communities from Loxahatchee National Wildlife Refuge, Florida, United States - Lox_Sample_3.3 (*) (MER-FS) (assembled)	2	1340	0.62	15	Bacteria	Proteobacteria	Deltaproteobacteria					1	Environmental	Terrestrial	Soil	Wetlands
3300033004 assembled Ga0335084_10442165	3300033004	Soil microbial communities from Loxahatchee National Wildlife Refuge, Florida, United States - Lox_Sample_4.4 (*) (MER-FS) (assembled)	2	1338	0.58	10									Environmental	Terrestrial	Soil	Wetlands
3300032893 assembled Ga0335069_10547015	3300032893	Soil microbial communities from Loxahatchee National Wildlife Refuge, Florida, United States - Lox_Sample_1.1 (*) (MER-FS) (assembled)	2	1336	0.61	6	Bacteria	Proteobacteria	Deltaproteobacteria	Syntrophobacterales	Syntrophaceae	Desulfobacca	Desulfobacca acetoxidans	1	Environmental	Terrestrial	Soil	Wetlands
3300032893 assembled Ga0335069_10550347	3300032893	Soil microbial communities from Loxahatchee National Wildlife Refuge, Florida, United States - Lox_Sample_1.1 (*) (MER-FS) (assembled)	3	1331	0.65	7									Environmental	Terrestrial	Soil	Wetlands
3300032898 assembled Ga0335072_10465410	3300032898	Soil microbial communities from Loxahatchee National Wildlife Refuge, Florida, United States - Lox_Sample_2.1 (*) (MER-FS) (assembled)	2	1326	0.61	7									Environmental	Terrestrial	Soil	Wetlands
3300032897 assembled Ga0335071_10405934	3300032897	Soil microbial communities from Loxahatchee National Wildlife Refuge, Florida, United States - Lox_Sample_1.5 (*) (MER-FS) (assembled)	2	1316	0.61	14	Bacteria							1	Environmental	Terrestrial	Soil	Wetlands
3300032892 assembled Ga0335081_10650676	3300032892	Soil microbial communities from Loxahatchee National Wildlife Refuge, Florida, United States - Lox_Sample_3.5 (*) (MER-FS) (assembled)	2	1289	0.64	7									Environmental	Terrestrial	Soil	Wetlands
3300033158 assembled Ga0335077_10504129	3300033158	Soil microbial communities from Loxahatchee National Wildlife Refuge, Florida, United States - Lox_Sample_3.1 (*) (MER-FS) (assembled)	2	1280	0.6	7	Bacteria							1	Environmental	Terrestrial	Soil	Wetlands
3300032805 assembled Ga0335078_10688964	3300032805	Soil microbial communities from Loxahatchee National Wildlife Refuge, Florida, United States - Lox_Sample_3.2 (*) (MER-FS) (assembled)	2	1269	0.62	7									Environmental	Terrestrial	Soil	Wetlands
3300032893 assembled Ga0335069_10596336	3300032893	Soil microbial communities from Loxahatchee National Wildlife Refuge, Florida, United States - Lox_Sample_1.1 (*) (MER-FS) (assembled)	2	1268	0.65	7									Environmental	Terrestrial	Soil	Wetlands
3300032829 assembled Ga0335070_10426313	3300032829	Soil microbial communities from Loxahatchee National Wildlife Refuge, Florida, United States - Lox_Sample_1.3 (*) (MER-FS) (assembled)	3	1266	0.66	6	Bacteria	Proteobacteria	Betaproteobacteria	Nitrosomonadales	Thiobacillaceae	Sulfuritortus	Sulfuritortus calidifontis	1	Environmental	Terrestrial	Soil	Wetlands
3300032897 assembled Ga0335071_10441127	3300032897	Soil microbial communities from Loxahatchee National Wildlife Refuge, Florida, United States - Lox_Sample_1.5 (*) (MER-FS) (assembled)	2	1255	0.66	7									Environmental	Terrestrial	Soil	Wetlands
3300032897 assembled Ga0335071_10441507	3300032897	Soil microbial communities from Loxahatchee National Wildlife Refuge, Florida, United States - Lox_Sample_1.5 (*) (MER-FS) (assembled)	2	1254	0.58	13	Bacteria	Proteobacteria	Deltaproteobacteria	Syntrophobacterales	Syntrophaceae	Desulfobacca	Desulfobacca acetoxidans	1	Environmental	Terrestrial	Soil	Wetlands
3300032770 assembled Ga0335085_10591152	3300032770	Soil microbial communities from Loxahatchee National Wildlife Refuge, Florida, United States - Lox_Sample_4.5 (*) (MER-FS) (assembled)	2	1251	0.58	7									Environmental	Terrestrial	Soil	Wetlands
3300032770 assembled Ga0335085_10595719	3300032770	Soil microbial communities from Loxahatchee National Wildlife Refuge, Florida, United States - Lox_Sample_4.5 (*) (MER-FS) (assembled)	2	1245	0.54	7									Environmental	Terrestrial	Soil	Wetlands
3300033158 assembled Ga0335077_10530287	3300033158	Soil microbial communities from Loxahatchee National Wildlife Refuge, Florida, United States - Lox_Sample_3.1 (*) (MER-FS) (assembled)	2	1240	0.56	7									Environmental	Terrestrial	Soil	Wetlands
3300032892 assembled Ga0335081_10697543	3300032892	Soil microbial communities from Loxahatchee National Wildlife Refuge, Florida, United States - Lox_Sample_3.5 (*) (MER-FS) (assembled)	2	1232	0.63	9	Bacteria							1	Environmental	Terrestrial	Soil	Wetlands
3300033004 assembled Ga0335084_10511971	3300033004	Soil microbial communities from Loxahatchee National Wildlife Refuge, Florida, United States - Lox_Sample_4.4 (*) (MER-FS) (assembled)	2	1232	0.59	17									Environmental	Terrestrial	Soil	Wetlands
3300033134 assembled Ga0335073_10598288	3300033134	Soil microbial communities from Loxahatchee National Wildlife Refuge, Florida, United States - Lox_Sample_2.2 (*) (MER-FS) (assembled)	2	1232	0.61	12	Bacteria							1	Environmental	Terrestrial	Soil	Wetlands
3300032829 assembled Ga0335070_10446383	3300032829	Soil microbial communities from Loxahatchee National Wildlife Refuge, Florida, United States - Lox_Sample_1.3 (*) (MER-FS) (assembled)	2	1231	0.67	14	Bacteria	Firmicutes	Clostridia	Clostridiales	Peptococcaceae			1	Environmental	Terrestrial	Soil	Wetlands
3300033158 assembled Ga0335077_10538264	3300033158	Soil microbial communities from Loxahatchee National Wildlife Refuge, Florida, United States - Lox_Sample_3.1 (*) (MER-FS) (assembled)	2	1229	0.68	7	Bacteria	Proteobacteria	Betaproteobacteria	Burkholderiales	unclassified	unclassified		1	Environmental	Terrestrial	Soil	Wetlands
3300032805 assembled Ga0335078_10731694	3300032805	Soil microbial communities from Loxahatchee National Wildlife Refuge, Florida, United States - Lox_Sample_3.2 (*) (MER-FS) (assembled)	2	1220	0.6	8	Bacteria							1	Environmental	Terrestrial	Soil	Wetlands
3300032897 assembled Ga0335071_10466527	3300032897	Soil microbial communities from Loxahatchee National Wildlife Refuge, Florida, United States - Lox_Sample_1.5 (*) (MER-FS) (assembled)	3	1215	0.42	6									Environmental	Terrestrial	Soil	Wetlands
3300032955 assembled Ga0335076_10423432	3300032955	Soil microbial communities from Loxahatchee National Wildlife Refuge, Florida, United States - Lox_Sample_2.5 (*) (MER-FS) (assembled)	2	1215	0.63	19	Bacteria							1	Environmental	Terrestrial	Soil	Wetlands
3300032892 assembled Ga0335081_10714319	3300032892	Soil microbial communities from Loxahatchee National Wildlife Refuge, Florida, United States - Lox_Sample_3.5 (*) (MER-FS) (assembled)	2	1213	0.62	8	Bacteria	Firmicutes	Clostridia	Clostridiales	Peptococcaceae			1	Environmental	Terrestrial	Soil	Wetlands
3300032954 assembled Ga0335083_10382597	3300032954	Soil microbial communities from Loxahatchee National Wildlife Refuge, Florida, United States - Lox_Sample_4.2 (*) (MER-FS) (assembled)	2	1208	0.59	7	Bacteria	Firmicutes						1	Environmental	Terrestrial	Soil	Wetlands
3300032805 assembled Ga0335078_10759713	3300032805	Soil microbial communities from Loxahatchee National Wildlife Refuge, Florida, United States - Lox_Sample_3.2 (*) (MER-FS) (assembled)	2	1190	0.62	7	Bacteria	Firmicutes	Clostridia					1	Environmental	Terrestrial	Soil	Wetlands
3300033004 assembled Ga0335084_10546847	3300033004	Soil microbial communities from Loxahatchee National Wildlife Refuge, Florida, United States - Lox_Sample_4.4 (*) (MER-FS) (assembled)	2	1188	0.67	11	Bacteria							1	Environmental	Terrestrial	Soil	Wetlands
3300032829 assembled Ga0335070_10475816	3300032829	Soil microbial communities from Loxahatchee National Wildlife Refuge, Florida, United States - Lox_Sample_1.3 (*) (MER-FS) (assembled)	2	1186	0.62	10	Bacteria							1	Environmental	Terrestrial	Soil	Wetlands
3300032893 assembled Ga0335069_10674635	3300032893	Soil microbial communities from Loxahatchee National Wildlife Refuge, Florida, United States - Lox_Sample_1.1 (*) (MER-FS) (assembled)	2	1178	0.55	5	Bacteria	Caldiserica	unclassified	unclassified	unclassified	unclassified	unclassified	1	Environmental	Terrestrial	Soil	Wetlands
3300033004 assembled Ga0335084_10560319	3300033004	Soil microbial communities from Loxahatchee National Wildlife Refuge, Florida, United States - Lox_Sample_4.4 (*) (MER-FS) (assembled)	2	1171	0.56	8	Bacteria	Firmicutes	Clostridia					1	Environmental	Terrestrial	Soil	Wetlands
3300032897 assembled Ga0335071_10501124	3300032897	Soil microbial communities from Loxahatchee National Wildlife Refuge, Florida, United States - Lox_Sample_1.5 (*) (MER-FS) (assembled)	3	1167	0.54	5	Bacteria							0.67	Environmental	Terrestrial	Soil	Wetlands
3300032805 assembled Ga0335078_10791383	3300032805	Soil microbial communities from Loxahatchee National Wildlife Refuge, Florida, United States - Lox_Sample_3.2 (*) (MER-FS) (assembled)	2	1158	0.56	17									Environmental	Terrestrial	Soil	Wetlands
3300032770 assembled Ga0335085_10670332	3300032770	Soil microbial communities from Loxahatchee National Wildlife Refuge, Florida, United States - Lox_Sample_4.5 (*) (MER-FS) (assembled)	2	1157	0.5	27	Bacteria	Nitrospirae	Nitrospira	Nitrospirales	Nitrospiraceae	Thermodesulfovibrio		1	Environmental	Terrestrial	Soil	Wetlands
3300032770 assembled Ga0335085_10672945	3300032770	Soil microbial communities from Loxahatchee National Wildlife Refuge, Florida, United States - Lox_Sample_4.5 (*) (MER-FS) (assembled)	2	1155	0.67	6									Environmental	Terrestrial	Soil	Wetlands
3300032897 assembled Ga0335071_10509897	3300032897	Soil microbial communities from Loxahatchee National Wildlife Refuge, Florida, United States - Lox_Sample_1.5 (*) (MER-FS) (assembled)	2	1155	0.65	9	Bacteria	Proteobacteria	Alphaproteobacteria	Rhizobiales	Hyphomicrobiaceae	Rhodomicrobium		1	Environmental	Terrestrial	Soil	Wetlands
3300032828 assembled Ga0335080_10612619	3300032828	Soil microbial communities from Loxahatchee National Wildlife Refuge, Florida, United States - Lox_Sample_3.4 (*) (MER-FS) (assembled)	2	1144	0.56	8	Bacteria	Firmicutes	Clostridia					1	Environmental	Terrestrial	Soil	Wetlands
3300032805 assembled Ga0335078_10809492	3300032805	Soil microbial communities from Loxahatchee National Wildlife Refuge, Florida, United States - Lox_Sample_3.2 (*) (MER-FS) (assembled)	2	1141	0.64	5	Bacteria							1	Environmental	Terrestrial	Soil	Wetlands
3300033004 assembled Ga0335084_10586794	3300033004	Soil microbial communities from Loxahatchee National Wildlife Refuge, Florida, United States - Lox_Sample_4.4 (*) (MER-FS) (assembled)	2	1141	0.55	6									Environmental	Terrestrial	Soil	Wetlands
3300032897 assembled Ga0335071_10523051	3300032897	Soil microbial communities from Loxahatchee National Wildlife Refuge, Florida, United States - Lox_Sample_1.5 (*) (MER-FS) (assembled)	2	1139	0.64	7									Environmental	Terrestrial	Soil	Wetlands
3300032829 assembled Ga0335070_10511006	3300032829	Soil microbial communities from Loxahatchee National Wildlife Refuge, Florida, United States - Lox_Sample_1.3 (*) (MER-FS) (assembled)	2	1138	0.64	16	Bacteria							1	Environmental	Terrestrial	Soil	Wetlands
3300032892 assembled Ga0335081_10788143	3300032892	Soil microbial communities from Loxahatchee National Wildlife Refuge, Florida, United States - Lox_Sample_3.5 (*) (MER-FS) (assembled)	2	1138	0.68	6	Bacteria							1	Environmental	Terrestrial	Soil	Wetlands
3300032805 assembled Ga0335078_10815102	3300032805	Soil microbial communities from Loxahatchee National Wildlife Refuge, Florida, United States - Lox_Sample_3.2 (*) (MER-FS) (assembled)	2	1135	0.62	19	Bacteria							1	Environmental	Terrestrial	Soil	Wetlands
3300032897 assembled Ga0335071_10527207	3300032897	Soil microbial communities from Loxahatchee National Wildlife Refuge, Florida, United States - Lox_Sample_1.5 (*) (MER-FS) (assembled)	2	1134	0.61	7	Bacteria	Proteobacteria						1	Environmental	Terrestrial	Soil	Wetlands
3300032954 assembled Ga0335083_10428464	3300032954	Soil microbial communities from Loxahatchee National Wildlife Refuge, Florida, United States - Lox_Sample_4.2 (*) (MER-FS) (assembled)	2	1123	0.56	7									Environmental	Terrestrial	Soil	Wetlands
3300032896 assembled Ga0335075_10582225	3300032896	Soil microbial communities from Loxahatchee National Wildlife Refuge, Florida, United States - Lox_Sample_2.4 (*) (MER-FS) (assembled)	2	1114	0.59	5									Environmental	Terrestrial	Soil	Wetlands
3300032897 assembled Ga0335071_10543959	3300032897	Soil microbial communities from Loxahatchee National Wildlife Refuge, Florida, United States - Lox_Sample_1.5 (*) (MER-FS) (assembled)	2	1113	0.62	9	Bacteria	Proteobacteria	Betaproteobacteria	Burkholderiales				1	Environmental	Terrestrial	Soil	Wetlands
3300032892 assembled Ga0335081_10825873	3300032892	Soil microbial communities from Loxahatchee National Wildlife Refuge, Florida, United States - Lox_Sample_3.5 (*) (MER-FS) (assembled)	2	1104	0.58	14									Environmental	Terrestrial	Soil	Wetlands
3300032892 assembled Ga0335081_10829021	3300032892	Soil microbial communities from Loxahatchee National Wildlife Refuge, Florida, United States - Lox_Sample_3.5 (*) (MER-FS) (assembled)	2	1101	0.59	4									Environmental	Terrestrial	Soil	Wetlands
3300032893 assembled Ga0335069_10754306	3300032893	Soil microbial communities from Loxahatchee National Wildlife Refuge, Florida, United States - Lox_Sample_1.1 (*) (MER-FS) (assembled)	2	1101	0.62	10	Bacteria	Proteobacteria	Betaproteobacteria					1	Environmental	Terrestrial	Soil	Wetlands
3300033158 assembled Ga0335077_10654321	3300033158	Soil microbial communities from Loxahatchee National Wildlife Refuge, Florida, United States - Lox_Sample_3.1 (*) (MER-FS) (assembled)	2	1089	0.6	8									Environmental	Terrestrial	Soil	Wetlands
3300032783 assembled Ga0335079_10669255	3300032783	Soil microbial communities from Loxahatchee National Wildlife Refuge, Florida, United States - Lox_Sample_3.3 (*) (MER-FS) (assembled)	2	1088	0.57	8									Environmental	Terrestrial	Soil	Wetlands
3300033158 assembled Ga0335077_10655117	3300033158	Soil microbial communities from Loxahatchee National Wildlife Refuge, Florida, United States - Lox_Sample_3.1 (*) (MER-FS) (assembled)	2	1088	0.6	9	Bacteria	Firmicutes	Clostridia	Clostridiales	Peptococcaceae			1	Environmental	Terrestrial	Soil	Wetlands
3300032829 assembled Ga0335070_10552507	3300032829	Soil microbial communities from Loxahatchee National Wildlife Refuge, Florida, United States - Lox_Sample_1.3 (*) (MER-FS) (assembled)	2	1087	0.66	8	Bacteria	Firmicutes	Clostridia					1	Environmental	Terrestrial	Soil	Wetlands
3300032897 assembled Ga0335071_10576824	3300032897	Soil microbial communities from Loxahatchee National Wildlife Refuge, Florida, United States - Lox_Sample_1.5 (*) (MER-FS) (assembled)	2	1077	0.56	6									Environmental	Terrestrial	Soil	Wetlands
3300032898 assembled Ga0335072_10624817	3300032898	Soil microbial communities from Loxahatchee National Wildlife Refuge, Florida, United States - Lox_Sample_2.1 (*) (MER-FS) (assembled)	2	1076	0.61	8	Bacteria							1	Environmental	Terrestrial	Soil	Wetlands
3300032829 assembled Ga0335070_10563024	3300032829	Soil microbial communities from Loxahatchee National Wildlife Refuge, Florida, United States - Lox_Sample_1.3 (*) (MER-FS) (assembled)	3	1075	0.7	7	Bacteria	Proteobacteria	Betaproteobacteria	Burkholderiales	Comamonadaceae	Curvibacter	Curvibacter sp. PAE-UM	0.67	Environmental	Terrestrial	Soil	Wetlands
3300032828 assembled Ga0335080_10682606	3300032828	Soil microbial communities from Loxahatchee National Wildlife Refuge, Florida, United States - Lox_Sample_3.4 (*) (MER-FS) (assembled)	2	1072	0.61	5	Bacteria							1	Environmental	Terrestrial	Soil	Wetlands
3300032893 assembled Ga0335069_10789274	3300032893	Soil microbial communities from Loxahatchee National Wildlife Refuge, Florida, United States - Lox_Sample_1.1 (*) (MER-FS) (assembled)	2	1071	0.62	10									Environmental	Terrestrial	Soil	Wetlands
3300033004 assembled Ga0335084_10660072	3300033004	Soil microbial communities from Loxahatchee National Wildlife Refuge, Florida, United States - Lox_Sample_4.4 (*) (MER-FS) (assembled)	2	1068	0.68	7	Bacteria	Firmicutes	Clostridia					1	Environmental	Terrestrial	Soil	Wetlands
3300033158 assembled Ga0335077_10682710	3300033158	Soil microbial communities from Loxahatchee National Wildlife Refuge, Florida, United States - Lox_Sample_3.1 (*) (MER-FS) (assembled)	2	1060	0.66	9									Environmental	Terrestrial	Soil	Wetlands
3300032897 assembled Ga0335071_10594735	3300032897	Soil microbial communities from Loxahatchee National Wildlife Refuge, Florida, United States - Lox_Sample_1.5 (*) (MER-FS) (assembled)	2	1058	0.59	5	Bacteria	Proteobacteria	Deltaproteobacteria	Desulfobacterales	Desulfobacteraceae	Desulfatiglans	Desulfatiglans anilini	1	Environmental	Terrestrial	Soil	Wetlands
3300032954 assembled Ga0335083_10470867	3300032954	Soil microbial communities from Loxahatchee National Wildlife Refuge, Florida, United States - Lox_Sample_4.2 (*) (MER-FS) (assembled)	2	1057	0.61	9	Bacteria	Proteobacteria	Betaproteobacteria					1	Environmental	Terrestrial	Soil	Wetlands
3300032892 assembled Ga0335081_10886437	3300032892	Soil microbial communities from Loxahatchee National Wildlife Refuge, Florida, United States - Lox_Sample_3.5 (*) (MER-FS) (assembled)	2	1054	0.63	6									Environmental	Terrestrial	Soil	Wetlands
3300032828 assembled Ga0335080_10714280	3300032828	Soil microbial communities from Loxahatchee National Wildlife Refuge, Florida, United States - Lox_Sample_3.4 (*) (MER-FS) (assembled)	2	1043	0.56	7	Bacteria	Firmicutes	Clostridia					1	Environmental	Terrestrial	Soil	Wetlands
3300032893 assembled Ga0335069_10825070	3300032893	Soil microbial communities from Loxahatchee National Wildlife Refuge, Florida, United States - Lox_Sample_1.1 (*) (MER-FS) (assembled)	1	1043	0.65	11	Bacteria	Firmicutes	Clostridia	Clostridiales	Peptococcaceae	Desulfohalotomaculum	Desulfohalotomaculum alkaliphilum	1	Environmental	Terrestrial	Soil	Wetlands
3300032828 assembled Ga0335080_10719230	3300032828	Soil microbial communities from Loxahatchee National Wildlife Refuge, Florida, United States - Lox_Sample_3.4 (*) (MER-FS) (assembled)	2	1039	0.59	7									Environmental	Terrestrial	Soil	Wetlands
3300033004 assembled Ga0335084_10692352	3300033004	Soil microbial communities from Loxahatchee National Wildlife Refuge, Florida, United States - Lox_Sample_4.4 (*) (MER-FS) (assembled)	2	1039	0.62	9	Bacteria	Proteobacteria	Betaproteobacteria	Burkholderiales				1	Environmental	Terrestrial	Soil	Wetlands
3300033158 assembled Ga0335077_10706302	3300033158	Soil microbial communities from Loxahatchee National Wildlife Refuge, Florida, United States - Lox_Sample_3.1 (*) (MER-FS) (assembled)	2	1038	0.53	7									Environmental	Terrestrial	Soil	Wetlands
3300032770 assembled Ga0335085_10803242	3300032770	Soil microbial communities from Loxahatchee National Wildlife Refuge, Florida, United States - Lox_Sample_4.5 (*) (MER-FS) (assembled)	1	1035	0.55	6	Bacteria	Firmicutes	Clostridia	Clostridiales	Peptococcaceae	Desulfohalotomaculum	Desulfohalotomaculum alkaliphilum	1	Environmental	Terrestrial	Soil	Wetlands
3300032893 assembled Ga0335069_10839409	3300032893	Soil microbial communities from Loxahatchee National Wildlife Refuge, Florida, United States - Lox_Sample_1.1 (*) (MER-FS) (assembled)	2	1032	0.48	5	Bacteria	Proteobacteria	Deltaproteobacteria	Syntrophobacterales	Syntrophobacteraceae	Syntrophobacter	Syntrophobacter fumaroxidans	1	Environmental	Terrestrial	Soil	Wetlands
3300032805 assembled Ga0335078_10946375	3300032805	Soil microbial communities from Loxahatchee National Wildlife Refuge, Florida, United States - Lox_Sample_3.2 (*) (MER-FS) (assembled)	2	1028	0.58	9	Bacteria	Firmicutes	Clostridia	Clostridiales	Peptococcaceae			1	Environmental	Terrestrial	Soil	Wetlands
3300032893 assembled Ga0335069_10844295	3300032893	Soil microbial communities from Loxahatchee National Wildlife Refuge, Florida, United States - Lox_Sample_1.1 (*) (MER-FS) (assembled)	2	1028	0.69	7									Environmental	Terrestrial	Soil	Wetlands
3300032782 assembled Ga0335082_10541196	3300032782	Soil microbial communities from Loxahatchee National Wildlife Refuge, Florida, United States - Lox_Sample_4.1 (*) (MER-FS) (assembled)	2	1026	0.52	8									Environmental	Terrestrial	Soil	Wetlands
3300032892 assembled Ga0335081_10925960	3300032892	Soil microbial communities from Loxahatchee National Wildlife Refuge, Florida, United States - Lox_Sample_3.5 (*) (MER-FS) (assembled)	2	1024	0.61	10	Bacteria	Proteobacteria	Deltaproteobacteria					1	Environmental	Terrestrial	Soil	Wetlands
3300033158 assembled Ga0335077_10721231	3300033158	Soil microbial communities from Loxahatchee National Wildlife Refuge, Florida, United States - Lox_Sample_3.1 (*) (MER-FS) (assembled)	2	1024	0.6	12									Environmental	Terrestrial	Soil	Wetlands
3300032897 assembled Ga0335071_10633292	3300032897	Soil microbial communities from Loxahatchee National Wildlife Refuge, Florida, United States - Lox_Sample_1.5 (*) (MER-FS) (assembled)	2	1020	0.62	7	Bacteria	Proteobacteria	Alphaproteobacteria	Rhizobiales	Hyphomicrobiaceae	Rhodomicrobium		1	Environmental	Terrestrial	Soil	Wetlands
3300032897 assembled Ga0335071_10640112	3300032897	Soil microbial communities from Loxahatchee National Wildlife Refuge, Florida, United States - Lox_Sample_1.5 (*) (MER-FS) (assembled)	2	1014	0.54	6	Bacteria	Caldiserica	unclassified	unclassified	unclassified	unclassified	unclassified	1	Environmental	Terrestrial	Soil	Wetlands
3300032829 assembled Ga0335070_10624412	3300032829	Soil microbial communities from Loxahatchee National Wildlife Refuge, Florida, United States - Lox_Sample_1.3 (*) (MER-FS) (assembled)	2	1012	0.53	9	Bacteria	Proteobacteria	Deltaproteobacteria	Syntrophobacterales	Syntrophaceae	Desulfomonile	Desulfomonile tiedjei	1	Environmental	Terrestrial	Soil	Wetlands
3300033004 assembled Ga0335084_10728569	3300033004	Soil microbial communities from Loxahatchee National Wildlife Refuge, Florida, United States - Lox_Sample_4.4 (*) (MER-FS) (assembled)	2	1010	0.54	5									Environmental	Terrestrial	Soil	Wetlands
3300032893 assembled Ga0335069_10873573	3300032893	Soil microbial communities from Loxahatchee National Wildlife Refuge, Florida, United States - Lox_Sample_1.1 (*) (MER-FS) (assembled)	2	1007	0.61	8	Bacteria	Proteobacteria	Alphaproteobacteria	Rhizobiales	Hyphomicrobiaceae	Rhodomicrobium		1	Environmental	Terrestrial	Soil	Wetlands
3300032829 assembled Ga0335070_10630761	3300032829	Soil microbial communities from Loxahatchee National Wildlife Refuge, Florida, United States - Lox_Sample_1.3 (*) (MER-FS) (assembled)	2	1006	0.54	8	Bacteria	Proteobacteria	Deltaproteobacteria	Syntrophobacterales	Syntrophobacteraceae			1	Environmental	Terrestrial	Soil	Wetlands
3300032783 assembled Ga0335079_10764124	3300032783	Soil microbial communities from Loxahatchee National Wildlife Refuge, Florida, United States - Lox_Sample_3.3 (*) (MER-FS) (assembled)	2	1004	0.71	7									Environmental	Terrestrial	Soil	Wetlands
3300032829 assembled Ga0335070_10634304	3300032829	Soil microbial communities from Loxahatchee National Wildlife Refuge, Florida, United States - Lox_Sample_1.3 (*) (MER-FS) (assembled)	2	1003	0.55	5	Bacteria							1	Environmental	Terrestrial	Soil	Wetlands
3300032893 assembled Ga0335069_10882353	3300032893	Soil microbial communities from Loxahatchee National Wildlife Refuge, Florida, United States - Lox_Sample_1.1 (*) (MER-FS) (assembled)	2	1001	0.66	9									Environmental	Terrestrial	Soil	Wetlands
3300032783 assembled Ga0335079_10769001	3300032783	Soil microbial communities from Loxahatchee National Wildlife Refuge, Florida, United States - Lox_Sample_3.3 (*) (MER-FS) (assembled)	2	1000	0.55	8	Bacteria							1	Environmental	Terrestrial	Soil	Wetlands
3300032805 assembled Ga0335078_10986342	3300032805	Soil microbial communities from Loxahatchee National Wildlife Refuge, Florida, United States - Lox_Sample_3.2 (*) (MER-FS) (assembled)	2	1000	0.68	12	Bacteria	Proteobacteria	Alphaproteobacteria					1	Environmental	Terrestrial	Soil	Wetlands

## Sheet: S9- N2 fixers
Scaffold ID	Genome ID	Genome	Gene Count	Sequence Length (bp)	GC Content	Read Depth	Lineage Domain	Lineage Phylum	Lineage Class	Lineage Order	Lineage Family	Lineage Genus	Lineage Species	Lineage Percentage	Ecosystem	Ecosystem Category	Ecosystem Type	Ecosystem Subtype	Specific Ecosystem
3300032829 assembled Ga0335070_10000002	3300032829	Soil microbial communities from Loxahatchee National Wildlife Refuge, Florida, United States - Lox_Sample_1.3 (*) (MER-FS) (assembled)	768	745587	0.56	29	Archaea	Euryarchaeota	Methanomicrobia	Methanomicrobiales	Methanoregulaceae	Methanoregula	Methanoregula boonei	0.75	Environmental	Terrestrial	Soil	Wetlands
3300032893 assembled Ga0335069_10000032	3300032893	Soil microbial communities from Loxahatchee National Wildlife Refuge, Florida, United States - Lox_Sample_1.1 (*) (MER-FS) (assembled)	214	234576	0.53	67	Archaea	Euryarchaeota	Methanomicrobia	Methanomicrobiales	Methanoregulaceae	Methanoregula	Methanoregula boonei	0.63	Environmental	Terrestrial	Soil	Wetlands
3300032897 assembled Ga0335071_10000028	3300032897	Soil microbial communities from Loxahatchee National Wildlife Refuge, Florida, United States - Lox_Sample_1.5 (*) (MER-FS) (assembled)	204	199873	0.56	16	Archaea	Euryarchaeota	Methanomicrobia	Methanomicrobiales	Methanoregulaceae	Methanoregula	Methanoregula boonei	0.8	Environmental	Terrestrial	Soil	Wetlands
3300032895 assembled Ga0335074_10000072	3300032895	Soil microbial communities from Loxahatchee National Wildlife Refuge, Florida, United States - Lox_Sample_2.3 (*) (MER-FS) (assembled)	186	188985	0.56	17	Bacteria							0.62	Environmental	Terrestrial	Soil	Wetlands
3300032897 assembled Ga0335071_10000296	3300032897	Soil microbial communities from Loxahatchee National Wildlife Refuge, Florida, United States - Lox_Sample_1.5 (*) (MER-FS) (assembled)	80	57648	0.64	21	Bacteria	Proteobacteria	Alphaproteobacteria	Rhizobiales	Bradyrhizobiaceae	Bradyrhizobium		0.55	Environmental	Terrestrial	Soil	Wetlands
3300032955 assembled Ga0335076_10000377	3300032955	Soil microbial communities from Loxahatchee National Wildlife Refuge, Florida, United States - Lox_Sample_2.5 (*) (MER-FS) (assembled)	27	40553	0.74	17	Bacteria	Proteobacteria	Deltaproteobacteria	Myxococcales				0.52	Environmental	Terrestrial	Soil	Wetlands
3300032829 assembled Ga0335070_10000841	3300032829	Soil microbial communities from Loxahatchee National Wildlife Refuge, Florida, United States - Lox_Sample_1.3 (*) (MER-FS) (assembled)	35	35262	0.52	24	Bacteria							0.89	Environmental	Terrestrial	Soil	Wetlands
3300032829 assembled Ga0335070_10000918	3300032829	Soil microbial communities from Loxahatchee National Wildlife Refuge, Florida, United States - Lox_Sample_1.3 (*) (MER-FS) (assembled)	33	33799	0.5	14	Bacteria							0.85	Environmental	Terrestrial	Soil	Wetlands
3300032892 assembled Ga0335081_10001950	3300032892	Soil microbial communities from Loxahatchee National Wildlife Refuge, Florida, United States - Lox_Sample_3.5 (*) (MER-FS) (assembled)	30	32637	0.53	12	Bacteria							0.8	Environmental	Terrestrial	Soil	Wetlands
3300032770 assembled Ga0335085_10002701	3300032770	Soil microbial communities from Loxahatchee National Wildlife Refuge, Florida, United States - Lox_Sample_4.5 (*) (MER-FS) (assembled)	33	32456	0.64	14	Bacteria	Proteobacteria						0.64	Environmental	Terrestrial	Soil	Wetlands
3300033158 assembled Ga0335077_10002714	3300033158	Soil microbial communities from Loxahatchee National Wildlife Refuge, Florida, United States - Lox_Sample_3.1 (*) (MER-FS) (assembled)	19	21189	0.71	16	Bacteria	Proteobacteria	Deltaproteobacteria					0.68	Environmental	Terrestrial	Soil	Wetlands
3300032828 assembled Ga0335080_10001985	3300032828	Soil microbial communities from Loxahatchee National Wildlife Refuge, Florida, United States - Lox_Sample_3.4 (*) (MER-FS) (assembled)	18	20417	0.71	15	Bacteria	Proteobacteria	Deltaproteobacteria					0.56	Environmental	Terrestrial	Soil	Wetlands
3300032892 assembled Ga0335081_10006344	3300032892	Soil microbial communities from Loxahatchee National Wildlife Refuge, Florida, United States - Lox_Sample_3.5 (*) (MER-FS) (assembled)	16	18820	0.7	19	Bacteria	Proteobacteria	Deltaproteobacteria					0.69	Environmental	Terrestrial	Soil	Wetlands
3300032783 assembled Ga0335079_10004670	3300032783	Soil microbial communities from Loxahatchee National Wildlife Refuge, Florida, United States - Lox_Sample_3.3 (*) (MER-FS) (assembled)	17	15746	0.7	15	Bacteria	Proteobacteria	Deltaproteobacteria					0.71	Environmental	Terrestrial	Soil	Wetlands
3300032782 assembled Ga0335082_10005687	3300032782	Soil microbial communities from Loxahatchee National Wildlife Refuge, Florida, United States - Lox_Sample_4.1 (*) (MER-FS) (assembled)	11	13663	0.73	12	Bacteria	Proteobacteria	Deltaproteobacteria	Myxococcales	Anaeromyxobacteraceae	Anaeromyxobacter		0.73	Environmental	Terrestrial	Soil	Wetlands
3300032897 assembled Ga0335071_10005474	3300032897	Soil microbial communities from Loxahatchee National Wildlife Refuge, Florida, United States - Lox_Sample_1.5 (*) (MER-FS) (assembled)	10	13174	0.72	16	Bacteria	Proteobacteria	Deltaproteobacteria					0.6	Environmental	Terrestrial	Soil	Wetlands
3300032897 assembled Ga0335071_10005981	3300032897	Soil microbial communities from Loxahatchee National Wildlife Refuge, Florida, United States - Lox_Sample_1.5 (*) (MER-FS) (assembled)	13	12609	0.49	17	Archaea	Euryarchaeota	Methanomicrobia					0.62	Environmental	Terrestrial	Soil	Wetlands
3300032892 assembled Ga0335081_10017844	3300032892	Soil microbial communities from Loxahatchee National Wildlife Refuge, Florida, United States - Lox_Sample_3.5 (*) (MER-FS) (assembled)	10	11484	0.67	10	Bacteria	Proteobacteria	Deltaproteobacteria	Myxococcales	Anaeromyxobacteraceae	Anaeromyxobacter		0.6	Environmental	Terrestrial	Soil	Wetlands
3300032893 assembled Ga0335069_10014169	3300032893	Soil microbial communities from Loxahatchee National Wildlife Refuge, Florida, United States - Lox_Sample_1.1 (*) (MER-FS) (assembled)	10	11175	0.63	14	Bacteria	Proteobacteria	Alphaproteobacteria					0.6	Environmental	Terrestrial	Soil	Wetlands
3300032805 assembled Ga0335078_10017884	3300032805	Soil microbial communities from Loxahatchee National Wildlife Refuge, Florida, United States - Lox_Sample_3.2 (*) (MER-FS) (assembled)	14	10544	0.61	16	Bacteria	Proteobacteria	Alphaproteobacteria	Rhizobiales	Methylocystaceae	Methylocystis		0.86	Environmental	Terrestrial	Soil	Wetlands
3300032829 assembled Ga0335070_10011246	3300032829	Soil microbial communities from Loxahatchee National Wildlife Refuge, Florida, United States - Lox_Sample_1.3 (*) (MER-FS) (assembled)	11	10452	0.56	13	Bacteria	Proteobacteria	Deltaproteobacteria	Syntrophobacterales	Syntrophaceae			0.73	Environmental	Terrestrial	Soil	Wetlands
3300032897 assembled Ga0335071_10008777	3300032897	Soil microbial communities from Loxahatchee National Wildlife Refuge, Florida, United States - Lox_Sample_1.5 (*) (MER-FS) (assembled)	8	10359	0.49	10	Bacteria	Nitrospirae	Nitrospira	Nitrospirales	Nitrospiraceae	Candidatus Magnetoovum	Candidatus Magnetoovum chiemensis	0.5	Environmental	Terrestrial	Soil	Wetlands
3300032955 assembled Ga0335076_10009191	3300032955	Soil microbial communities from Loxahatchee National Wildlife Refuge, Florida, United States - Lox_Sample_2.5 (*) (MER-FS) (assembled)	9	9961	0.68	22	Bacteria	Proteobacteria	Deltaproteobacteria	Myxococcales	Anaeromyxobacteraceae	Anaeromyxobacter	Anaeromyxobacter sp. PSR-1	0.33	Environmental	Terrestrial	Soil	Wetlands
3300032954 assembled Ga0335083_10013169	3300032954	Soil microbial communities from Loxahatchee National Wildlife Refuge, Florida, United States - Lox_Sample_4.2 (*) (MER-FS) (assembled)	13	9860	0.64	12	Bacteria	Proteobacteria	Betaproteobacteria	Burkholderiales	Burkholderiaceae	Paraburkholderia		0.69	Environmental	Terrestrial	Soil	Wetlands
3300032954 assembled Ga0335083_10013968	3300032954	Soil microbial communities from Loxahatchee National Wildlife Refuge, Florida, United States - Lox_Sample_4.2 (*) (MER-FS) (assembled)	14	9548	0.63	8	Bacteria	Proteobacteria	Betaproteobacteria	Burkholderiales	Burkholderiaceae	Paraburkholderia		0.79	Environmental	Terrestrial	Soil	Wetlands
3300033004 assembled Ga0335084_10009883	3300033004	Soil microbial communities from Loxahatchee National Wildlife Refuge, Florida, United States - Lox_Sample_4.4 (*) (MER-FS) (assembled)	8	9547	0.71	13	Bacteria	Proteobacteria	Deltaproteobacteria	Myxococcales	Anaeromyxobacteraceae	Anaeromyxobacter		0.75	Environmental	Terrestrial	Soil	Wetlands
3300032893 assembled Ga0335069_10019199	3300032893	Soil microbial communities from Loxahatchee National Wildlife Refuge, Florida, United States - Lox_Sample_1.1 (*) (MER-FS) (assembled)	8	9495	0.52	11	Bacteria	Nitrospirae	Nitrospira	Nitrospirales	Nitrospiraceae			0.38	Environmental	Terrestrial	Soil	Wetlands
3300032828 assembled Ga0335080_10011379	3300032828	Soil microbial communities from Loxahatchee National Wildlife Refuge, Florida, United States - Lox_Sample_3.4 (*) (MER-FS) (assembled)	9	9361	0.57	13	Bacteria	Proteobacteria	Deltaproteobacteria	Desulfuromonadales	Geobacteraceae	Geobacter	Geobacter sp. DSM 2909	0.44	Environmental	Terrestrial	Soil	Wetlands
3300032805 assembled Ga0335078_10023716	3300032805	Soil microbial communities from Loxahatchee National Wildlife Refuge, Florida, United States - Lox_Sample_3.2 (*) (MER-FS) (assembled)	10	9116	0.54	10	Bacteria	Nitrospirae	Nitrospira	Nitrospirales	Nitrospiraceae	Candidatus Magnetoovum	Candidatus Magnetoovum chiemensis	0.7	Environmental	Terrestrial	Soil	Wetlands
3300032828 assembled Ga0335080_10014921	3300032828	Soil microbial communities from Loxahatchee National Wildlife Refuge, Florida, United States - Lox_Sample_3.4 (*) (MER-FS) (assembled)	7	8260	0.66	9	Bacteria	Proteobacteria	Deltaproteobacteria	Myxococcales	Anaeromyxobacteraceae	Anaeromyxobacter	Anaeromyxobacter sp. Fw109-5	0.71	Environmental	Terrestrial	Soil	Wetlands
3300032783 assembled Ga0335079_10017366	3300032783	Soil microbial communities from Loxahatchee National Wildlife Refuge, Florida, United States - Lox_Sample_3.3 (*) (MER-FS) (assembled)	8	8221	0.65	10	Bacteria	Proteobacteria	Deltaproteobacteria	Myxococcales	Anaeromyxobacteraceae	Anaeromyxobacter	Anaeromyxobacter sp. Fw109-5	0.5	Environmental	Terrestrial	Soil	Wetlands
3300032893 assembled Ga0335069_10025403	3300032893	Soil microbial communities from Loxahatchee National Wildlife Refuge, Florida, United States - Lox_Sample_1.1 (*) (MER-FS) (assembled)	9	8117	0.56	16	Bacteria	Proteobacteria	Deltaproteobacteria	Syntrophobacterales	Syntrophaceae	Syntrophus	Syntrophus gentianae	0.44	Environmental	Terrestrial	Soil	Wetlands
3300032954 assembled Ga0335083_10019282	3300032954	Soil microbial communities from Loxahatchee National Wildlife Refuge, Florida, United States - Lox_Sample_4.2 (*) (MER-FS) (assembled)	7	7918	0.57	20	Bacteria	Proteobacteria	Deltaproteobacteria	Desulfuromonadales	Geobacteraceae	Geobacter		0.86	Environmental	Terrestrial	Soil	Wetlands
3300032829 assembled Ga0335070_10019295	3300032829	Soil microbial communities from Loxahatchee National Wildlife Refuge, Florida, United States - Lox_Sample_1.3 (*) (MER-FS) (assembled)	13	7899	0.53	11	Bacteria	Proteobacteria	Deltaproteobacteria					0.54	Environmental	Terrestrial	Soil	Wetlands
3300032770 assembled Ga0335085_10028560	3300032770	Soil microbial communities from Loxahatchee National Wildlife Refuge, Florida, United States - Lox_Sample_4.5 (*) (MER-FS) (assembled)	7	7806	0.58	22	Bacteria	Proteobacteria	Deltaproteobacteria	Desulfuromonadales	Geobacteraceae	Geobacter	Geobacter pickeringii	0.57	Environmental	Terrestrial	Soil	Wetlands
3300032829 assembled Ga0335070_10024571	3300032829	Soil microbial communities from Loxahatchee National Wildlife Refuge, Florida, United States - Lox_Sample_1.3 (*) (MER-FS) (assembled)	6	6926	0.55	24	Bacteria	Proteobacteria	Deltaproteobacteria	Desulfuromonadales	Geobacteraceae	Geobacter	Geobacter sp. DSM 2909	0.83	Environmental	Terrestrial	Soil	Wetlands
3300032897 assembled Ga0335071_10019035	3300032897	Soil microbial communities from Loxahatchee National Wildlife Refuge, Florida, United States - Lox_Sample_1.5 (*) (MER-FS) (assembled)	10	6920	0.63	22	Bacteria	Proteobacteria	Betaproteobacteria	Rhodocyclales				0.7	Environmental	Terrestrial	Soil	Wetlands
3300032805 assembled Ga0335078_10040797	3300032805	Soil microbial communities from Loxahatchee National Wildlife Refuge, Florida, United States - Lox_Sample_3.2 (*) (MER-FS) (assembled)	8	6883	0.59	16	Bacteria	Firmicutes						0.38	Environmental	Terrestrial	Soil	Wetlands
3300032805 assembled Ga0335078_10048453	3300032805	Soil microbial communities from Loxahatchee National Wildlife Refuge, Florida, United States - Lox_Sample_3.2 (*) (MER-FS) (assembled)	5	6292	0.59	16	Bacteria	Firmicutes	unclassified	unclassified	unclassified	Hydrogenispora	Hydrogenispora ethanolica	0.8	Environmental	Terrestrial	Soil	Wetlands
3300032782 assembled Ga0335082_10025946	3300032782	Soil microbial communities from Loxahatchee National Wildlife Refuge, Florida, United States - Lox_Sample_4.1 (*) (MER-FS) (assembled)	5	6255	0.69	14	Bacteria	Proteobacteria	Deltaproteobacteria	Myxococcales	Anaeromyxobacteraceae	Anaeromyxobacter	Anaeromyxobacter sp. Fw109-5	0.6	Environmental	Terrestrial	Soil	Wetlands
3300032783 assembled Ga0335079_10031186	3300032783	Soil microbial communities from Loxahatchee National Wildlife Refuge, Florida, United States - Lox_Sample_3.3 (*) (MER-FS) (assembled)	5	6115	0.57	12									Environmental	Terrestrial	Soil	Wetlands
3300032897 assembled Ga0335071_10027106	3300032897	Soil microbial communities from Loxahatchee National Wildlife Refuge, Florida, United States - Lox_Sample_1.5 (*) (MER-FS) (assembled)	5	5713	0.54	10									Environmental	Terrestrial	Soil	Wetlands
3300032783 assembled Ga0335079_10038698	3300032783	Soil microbial communities from Loxahatchee National Wildlife Refuge, Florida, United States - Lox_Sample_3.3 (*) (MER-FS) (assembled)	4	5474	0.66	14	Bacteria	Proteobacteria	Deltaproteobacteria	Myxococcales	Anaeromyxobacteraceae	Anaeromyxobacter		0.75	Environmental	Terrestrial	Soil	Wetlands
3300032805 assembled Ga0335078_10062457	3300032805	Soil microbial communities from Loxahatchee National Wildlife Refuge, Florida, United States - Lox_Sample_3.2 (*) (MER-FS) (assembled)	4	5469	0.55	10	Bacteria	Proteobacteria	Alphaproteobacteria	Rhizobiales	Beijerinckiaceae	Methylocapsa	Methylocapsa palsarum	0.75	Environmental	Terrestrial	Soil	Wetlands
3300032805 assembled Ga0335078_10063406	3300032805	Soil microbial communities from Loxahatchee National Wildlife Refuge, Florida, United States - Lox_Sample_3.2 (*) (MER-FS) (assembled)	6	5425	0.59	8	Bacteria	Proteobacteria	Gammaproteobacteria					0.5	Environmental	Terrestrial	Soil	Wetlands
3300032897 assembled Ga0335071_10034426	3300032897	Soil microbial communities from Loxahatchee National Wildlife Refuge, Florida, United States - Lox_Sample_1.5 (*) (MER-FS) (assembled)	7	5028	0.63	15	Bacteria	Proteobacteria	Betaproteobacteria	Rhodocyclales	Rhodocyclaceae	Propionivibrio	Propionivibrio dicarboxylicus	0.57	Environmental	Terrestrial	Soil	Wetlands
3300032805 assembled Ga0335078_10079124	3300032805	Soil microbial communities from Loxahatchee National Wildlife Refuge, Florida, United States - Lox_Sample_3.2 (*) (MER-FS) (assembled)	5	4790	0.67	24	Bacteria	Proteobacteria	Deltaproteobacteria	Myxococcales	Anaeromyxobacteraceae	Anaeromyxobacter		0.8	Environmental	Terrestrial	Soil	Wetlands
3300032805 assembled Ga0335078_10085116	3300032805	Soil microbial communities from Loxahatchee National Wildlife Refuge, Florida, United States - Lox_Sample_3.2 (*) (MER-FS) (assembled)	5	4598	0.58	15	Bacteria	Proteobacteria	Deltaproteobacteria	Syntrophobacterales	Syntrophaceae	Syntrophus	Syntrophus gentianae	0.6	Environmental	Terrestrial	Soil	Wetlands
3300032770 assembled Ga0335085_10076868	3300032770	Soil microbial communities from Loxahatchee National Wildlife Refuge, Florida, United States - Lox_Sample_4.5 (*) (MER-FS) (assembled)	3	4396	0.58	11									Environmental	Terrestrial	Soil	Wetlands
3300033158 assembled Ga0335077_10070630	3300033158	Soil microbial communities from Loxahatchee National Wildlife Refuge, Florida, United States - Lox_Sample_3.1 (*) (MER-FS) (assembled)	4	4173	0.65	20	Bacteria	Proteobacteria	Deltaproteobacteria	Myxococcales	Anaeromyxobacteraceae	Anaeromyxobacter		0.75	Environmental	Terrestrial	Soil	Wetlands
3300032893 assembled Ga0335069_10081109	3300032893	Soil microbial communities from Loxahatchee National Wildlife Refuge, Florida, United States - Lox_Sample_1.1 (*) (MER-FS) (assembled)	5	4144	0.64	14	Bacteria	Proteobacteria	Betaproteobacteria	Burkholderiales				0.8	Environmental	Terrestrial	Soil	Wetlands
3300032892 assembled Ga0335081_10113630	3300032892	Soil microbial communities from Loxahatchee National Wildlife Refuge, Florida, United States - Lox_Sample_3.5 (*) (MER-FS) (assembled)	4	3983	0.59	23	Bacteria	Proteobacteria						0.75	Environmental	Terrestrial	Soil	Wetlands
3300032897 assembled Ga0335071_10060013	3300032897	Soil microbial communities from Loxahatchee National Wildlife Refuge, Florida, United States - Lox_Sample_1.5 (*) (MER-FS) (assembled)	5	3742	0.54	18	Bacteria	Proteobacteria	Deltaproteobacteria	Syntrophobacterales	Syntrophobacteraceae	Syntrophobacter	Syntrophobacter fumaroxidans	0.6	Environmental	Terrestrial	Soil	Wetlands
3300032828 assembled Ga0335080_10098344	3300032828	Soil microbial communities from Loxahatchee National Wildlife Refuge, Florida, United States - Lox_Sample_3.4 (*) (MER-FS) (assembled)	6	3246	0.55	8	Bacteria	Proteobacteria	Deltaproteobacteria	Syntrophobacterales	Syntrophaceae	Syntrophus	Syntrophus gentianae	0.67	Environmental	Terrestrial	Soil	Wetlands
3300032892 assembled Ga0335081_10160829	3300032892	Soil microbial communities from Loxahatchee National Wildlife Refuge, Florida, United States - Lox_Sample_3.5 (*) (MER-FS) (assembled)	3	3190	0.55	10	Bacteria	Proteobacteria	Alphaproteobacteria	Rhizobiales	Beijerinckiaceae	Methylocapsa	Methylocapsa palsarum	0.67	Environmental	Terrestrial	Soil	Wetlands
3300032897 assembled Ga0335071_10099176	3300032897	Soil microbial communities from Loxahatchee National Wildlife Refuge, Florida, United States - Lox_Sample_1.5 (*) (MER-FS) (assembled)	5	2858	0.54	7	Archaea	Euryarchaeota	Methanomicrobia	Methanosarcinales	Methanosaetaceae	Methanothrix	Methanothrix soehngenii	1	Environmental	Terrestrial	Soil	Wetlands
3300032770 assembled Ga0335085_10176592	3300032770	Soil microbial communities from Loxahatchee National Wildlife Refuge, Florida, United States - Lox_Sample_4.5 (*) (MER-FS) (assembled)	3	2643	0.58	19	Bacteria	Proteobacteria	Gammaproteobacteria	Methylococcales	Methylococcaceae	Methyloterricola	Methyloterricola oryzae	0.67	Environmental	Terrestrial	Soil	Wetlands
3300032783 assembled Ga0335079_10206109	3300032783	Soil microbial communities from Loxahatchee National Wildlife Refuge, Florida, United States - Lox_Sample_3.3 (*) (MER-FS) (assembled)	3	2180	0.52	7	Bacteria	Nitrospirae	Nitrospira	Nitrospirales	Nitrospiraceae	Candidatus Magnetoovum	Candidatus Magnetoovum chiemensis	0.67	Environmental	Terrestrial	Soil	Wetlands
3300032898 assembled Ga0335072_10229856	3300032898	Soil microbial communities from Loxahatchee National Wildlife Refuge, Florida, United States - Lox_Sample_2.1 (*) (MER-FS) (assembled)	3	2158	0.61	17	Bacteria	Proteobacteria	Alphaproteobacteria	Rhizobiales				1	Environmental	Terrestrial	Soil	Wetlands
3300032897 assembled Ga0335071_10295230	3300032897	Soil microbial communities from Loxahatchee National Wildlife Refuge, Florida, United States - Lox_Sample_1.5 (*) (MER-FS) (assembled)	4	1574	0.71	11	Bacteria	Proteobacteria	Deltaproteobacteria	Myxococcales	Anaeromyxobacteraceae	Anaeromyxobacter		0.75	Environmental	Terrestrial	Soil	Wetlands
